# Supplementary material for: Sub-MIC Tylosin Inhibits Streptococcus suis Biofilm Formation and Results in Differential Protein Expression
Source: Front Microbiol. 2016 Mar 30;7:384. doi: 10.3389/fmicb.2016.00384 (PMC4811924; doi:10.3389/fmicb.2016.00384)
Supplement: Supplementary file 1 [file Table1.XLSX]

## Sheet: Sheet1
Accession	Description	Molecular Function	Cellular Component	Biological Process	Fold change	p value
G7SER0	Putative uncharacterized protein OS=Streptococcus suis D12 GN=SSUD12_2024 PE=4 SV=1 - [G7SER0_STRSU]		membrane		1.13018	0.44663
G7S2M0	DNA gyrase subunit B OS=Streptococcus suis SS12 GN=gyrB PE=3 SV=1 - [G7S2M0_STRSU]	nucleotide binding; metal ion binding; DNA binding; catalytic activity	chromosome; cytoplasm	metabolic process	1.27476	0.130227
D5AGH9	Antigen-like protein OS=Streptococcus suis (strain GZ1) GN=SSGZ1_0479 PE=4 SV=1 - [D5AGH9_STRGZ]		membrane		1.00517	0.977094
G7SHZ3	Bacteriophage protein, putative OS=Streptococcus suis D12 GN=SSUD12_1185 PE=4 SV=1 - [G7SHZ3_STRSU]				0.697637	0.0108246
F4EDP5	Putative uncharacterized protein OS=Streptococcus suis GN=SSUST3_0548 PE=4 SV=1 - [F4EDP5_STRSU]				0.568016	6.31272e-05
K0FG35	CpsR OS=Streptococcus suis GN=cpsR PE=3 SV=1 - [K0FG35_STRSU]	catalytic activity; nucleotide binding	membrane	metabolic process	0.699226	0.0113339
G5KZN4	DNA polymerase IV OS=Streptococcus suis R61 GN=dinB PE=3 SV=1 - [G5KZN4_STRSU]	metal ion binding; DNA binding; catalytic activity	cytoplasm	metabolic process; response to stimulus	1.3112	0.0911652
G7RZW0	Sugar ABC transporter permease OS=Streptococcus suis A7 GN=SSUA7_0854 PE=3 SV=1 - [G7RZW0_STRSU]	transporter activity	membrane	transport	1.50832	0.0103361
A4W3Y3	Response regulator OS=Streptococcus suis (strain 98HAH33) GN=SSU98_1914 PE=4 SV=1 - [A4W3Y3_STRS2]	signal transducer activity		cell communication; regulation of biological process; response to stimulus; metabolic process	1.14151	0.410296
M1VJJ3	Glycosyltransferase OS=Streptococcus suis GN=cps6J PE=4 SV=1 - [M1VJJ3_STRSU]	catalytic activity			0.916878	0.537084
G7SM56	Ribosomal RNA small subunit methyltransferase H OS=Streptococcus suis ST1 GN=mraW PE=3 SV=1 - [G7SM56_STRSU]	catalytic activity	cytoplasm	metabolic process	1.59494	0.00357713
M1VRI8	Nucleoside-diphosphate-sugar epimerase OS=Streptococcus suis GN=cps28Q PE=4 SV=1 - [M1VRI8_STRSU]	catalytic activity		metabolic process	0.682235	0.00680846
M1UBA1	Transcriptional regulator OS=Streptococcus suis SC070731 GN=NJAUSS_1479 PE=4 SV=1 - [M1UBA1_STRSU]	DNA binding		metabolic process; regulation of biological process	0.964104	0.793071
G7S4D4	Phage envelope protein OS=Streptococcus suis SS12 GN=SSU12_1709 PE=4 SV=1 - [G7S4D4_STRSU]				1.29158	0.110693
R4NVP5	Peptidyl-prolyl cis-trans isomerase OS=Streptococcus suis TL13 GN=TL13_0653 PE=3 SV=1 - [R4NVP5_STRSU]	catalytic activity			1.44942	0.0205861
G5KYB1	Putative uncharacterized protein OS=Streptococcus suis R61 GN=SSUR61_0636 PE=4 SV=1 - [G5KYB1_STRSU]	catalytic activity; nucleotide binding			1.10874	0.521259
G5L047	CHAP domain containing protein OS=Streptococcus suis R61 GN=SSUR61_1375 PE=4 SV=1 - [G5L047_STRSU]				1.05267	0.75112
G7SEJ7	Serum opacity factor OS=Streptococcus suis D12 GN=SSUD12_1630 PE=4 SV=1 - [G7SEJ7_STRSU]	protein binding	extracellular; membrane		1.07163	0.668124
C5VWE1	Putative beta-glucosidase OS=Streptococcus suis (strain P1/7) GN=SSU1927 PE=4 SV=1 - [C5VWE1_STRSE]	catalytic activity	membrane	metabolic process	0.833444	0.196558
G5L351	NsuB OS=Streptococcus suis R61 GN=SSUR61_1115 PE=4 SV=1 - [G5L351_STRSU]		membrane		2.69499	5.99106e-10
M1VK55	Glycosyltransferase OS=Streptococcus suis GN=cps28H PE=4 SV=1 - [M1VK55_STRSU]	catalytic activity			1.66279	0.00150583
G5L158	3-oxoacyl-[acyl-carrier-protein] synthase 2 OS=Streptococcus suis R61 GN=fabF PE=3 SV=1 - [G5L158_STRSU]	catalytic activity	membrane	metabolic process	0.98395	0.905803
G7S8Q2	Peptidase M22 glycoprotease OS=Streptococcus suis D9 GN=SSUD9_0170 PE=4 SV=1 - [G7S8Q2_STRSU]	catalytic activity		metabolic process	1.97877	2.03916e-05
I3VFP1	DNA recombinase OS=Streptococcus suis PE=4 SV=1 - [I3VFP1_STRSU]	catalytic activity; DNA binding		metabolic process	1.04132	0.803027
G8DUA6	ORF25Y OS=Streptococcus suis PE=4 SV=1 - [G8DUA6_STRSU]	DNA binding; catalytic activity		metabolic process; regulation of biological process	0.808185	0.131326
E8UKS3	Uncharacterized protein OS=Streptococcus suis (strain JS14) GN=SSUJS14_0524 PE=4 SV=1 - [E8UKS3_STREJ]	DNA binding; catalytic activity		metabolic process; regulation of biological process	1.09138	0.587247
G7SMA8	Biotin carboxylase subunit of acetyl-CoA carboxylase OS=Streptococcus suis ST1 GN=accC PE=4 SV=1 - [G7SMA8_STRSU]	catalytic activity; nucleotide binding; metal ion binding		metabolic process	0.950272	0.715531
A4W1T2	SPX domain-containing protein involved in vacuolar polyphosphate accumulation OS=Streptococcus suis (strain 98HAH33) GN=SSU98_1163 PE=4 SV=1 - [A4W1T2_STRS2]				0.945988	0.691836
A4W1I2	Integrase OS=Streptococcus suis (strain 98HAH33) GN=SSU98_1063 PE=4 SV=1 - [A4W1I2_STRS2]	DNA binding		metabolic process	1.20436	0.246751
B9WX95	Asparaginyl-tRNA synthetase OS=Streptococcus suis 89/1591 GN=SsuiDRAFT_2384 PE=4 SV=1 - [B9WX95_STRSU]	nucleotide binding; catalytic activity	cytoplasm	metabolic process	1.00573	0.974339
F4ECV4	Cell cycle protein GpsB OS=Streptococcus suis GN=gpsB PE=3 SV=1 - [F4ECV4_STRSU]		cytoplasm	cell organization and biogenesis; regulation of biological process; cell division	0.753605	0.0451774
B9WXE7	Transcriptional regulator, TetR family OS=Streptococcus suis 89/1591 GN=SsuiDRAFT_2475 PE=4 SV=1 - [B9WXE7_STRSU]	DNA binding		metabolic process; regulation of biological process	0.884566	0.38389
B9WY95	Peptidase M20 OS=Streptococcus suis 89/1591 GN=SsuiDRAFT_2032 PE=4 SV=1 - [B9WY95_STRSU]	catalytic activity	membrane	metabolic process	1.64754	0.00183349
G7SPK7	Putative uncharacterized protein OS=Streptococcus suis ST1 GN=SSUST1_1928 PE=4 SV=1 - [G7SPK7_STRSU]				1.1576	0.362378
G7S733	Uronate isomerase OS=Streptococcus suis SS12 GN=uxaC PE=3 SV=1 - [G7S733_STRSU]	catalytic activity		metabolic process	1.11282	0.506462
R4NK46	Cysteine synthase OS=Streptococcus suis TL13 GN=cysM PE=3 SV=1 - [R4NK46_STRSU]				0.691896	0.00914189
F4EF38	Permease OS=Streptococcus suis GN=SSUST3_0888 PE=4 SV=1 - [F4EF38_STRSU]				0.896499	0.437712
M1UW57	Uncharacterized protein OS=Streptococcus suis SC070731 GN=NJAUSS_1692 PE=4 SV=1 - [M1UW57_STRSU]				0.902018	0.463745
C5VYQ6	Putative uncharacterized protein OS=Streptococcus suis (strain P1/7) GN=SSU1381 PE=4 SV=1 - [C5VYQ6_STRSE]				1.05231	0.752754
G7SKQ0	CHAP domain containing protein OS=Streptococcus suis ST1 GN=SSUST1_0022 PE=4 SV=1 - [G7SKQ0_STRSU]				2.17988	1.14268e-06
M1UT33	Putative DNA relaxase nicK OS=Streptococcus suis SC070731 GN=NJAUSS_0124 PE=4 SV=1 - [M1UT33_STRSU]	DNA binding; catalytic activity		metabolic process	0.97269	0.841738
A4W1V0	Sugar kinase, ribokinase family OS=Streptococcus suis (strain 98HAH33) GN=SSU98_1181 PE=4 SV=1 - [A4W1V0_STRS2]	catalytic activity		metabolic process	0.696977	0.0106188
G7SE60	Putative uncharacterized protein OS=Streptococcus suis D12 GN=SSUD12_1239 PE=4 SV=1 - [G7SE60_STRSU]		membrane		1.08061	0.63062
F4EGA8	Phosphoribosylamine--glycine ligase OS=Streptococcus suis GN=purD PE=3 SV=1 - [F4EGA8_STRSU]	nucleotide binding; metal ion binding; catalytic activity		metabolic process	0.714977	0.0175574
G5KZP4	LPXTG-motif cell wall anchor domain protein OS=Streptococcus suis R61 GN=SSUR61_1219 PE=4 SV=1 - [G5KZP4_STRSU]	catalytic activity; metal ion binding	extracellular; membrane		1.10215	0.545737
G7SKE2	S-adenosylmethionine synthase OS=Streptococcus suis ST1 GN=metK PE=3 SV=1 - [G7SKE2_STRSU]	nucleotide binding; metal ion binding; catalytic activity	cytoplasm	metabolic process	1.0266	0.872502
A5JSI4	Cell wall hydrolase/autolysin (Fragment) OS=Streptococcus suis PE=4 SV=1 - [A5JSI4_STRSU]	catalytic activity		metabolic process	1.46617	0.0169744
G7SJZ7	Primosomal protein N' OS=Streptococcus suis ST1 GN=SSUST1_0424 PE=4 SV=1 - [G7SJZ7_STRSU]	nucleotide binding; DNA binding; catalytic activity	membrane	metabolic process	1.72008	0.000711325
A4VZ91	50S ribosomal protein L32 OS=Streptococcus suis (strain 98HAH33) GN=rpmF PE=3 SV=1 - [RL32_STRS2]	structural molecule activity	cytoplasm; ribosome	metabolic process	1.91588	4.93375e-05
D5AI71	Carbohydrate kinase, PfkB OS=Streptococcus suis (strain GZ1) GN=SSGZ1_1079 PE=4 SV=1 - [D5AI71_STRGZ]	catalytic activity	membrane	metabolic process	0.998389	0.987721
C6GWI2	Site-specific recombinase OS=Streptococcus suis (strain BM407) GN=SSUBM407_0524 PE=4 SV=1 - [C6GWI2_STRS4]	catalytic activity; DNA binding	membrane	metabolic process	1.07944	0.635439
M1UVB3	Cell wall biosynthesis glycosyltransferase OS=Streptococcus suis SC070731 GN=NJAUSS_1189 PE=4 SV=1 - [M1UVB3_STRSU]	catalytic activity			0.927374	0.591411
G7S698	Putative uncharacterized protein OS=Streptococcus suis SS12 GN=SSU12_0842 PE=4 SV=1 - [G7S698_STRSU]	DNA binding		metabolic process; regulation of biological process	0.86931	0.320375
G7SFV5	Putative uncharacterized protein OS=Streptococcus suis D12 GN=SSUD12_1032 PE=4 SV=1 - [G7SFV5_STRSU]		membrane		1.19824	0.259981
G5KZT7	cAMP-binding protein OS=Streptococcus suis R61 GN=SSUR61_1262 PE=4 SV=1 - [G5KZT7_STRSU]	DNA binding	membrane	metabolic process; regulation of biological process	1.24847	0.166667
G7SEX8	Putative uncharacterized protein OS=Streptococcus suis D12 GN=SSUD12_0194 PE=4 SV=1 - [G7SEX8_STRSU]	DNA binding; catalytic activity; nucleotide binding	membrane	metabolic process; response to stimulus	0.9735	0.846342
G5L1H9	Putative uncharacterized protein OS=Streptococcus suis R61 GN=SSUR61_1961 PE=4 SV=1 - [G5L1H9_STRSU]	catalytic activity	cytoplasm	metabolic process	0.886903	0.394152
G5KY65	Putative flavodoxin OS=Streptococcus suis R61 GN=SSUR61_0590 PE=4 SV=1 - [G5KY65_STRSU]	nucleotide binding; catalytic activity		metabolic process	0.903962	0.473075
D5AFN4	Xaa-Pro dipeptidyl-peptidase OS=Streptococcus suis (strain GZ1) GN=pepX PE=3 SV=1 - [D5AFN4_STRGZ]	catalytic activity	cytoplasm; membrane	metabolic process	3.09505	1.72038e-12
R4NKM9	Uncharacterized protein OS=Streptococcus suis TL13 GN=TL13_1309 PE=4 SV=1 - [R4NKM9_STRSU]				0.757748	0.0495008
G5KX48	ABC-type uncharacterized transport system, permease component OS=Streptococcus suis R61 GN=SSUR61_0266 PE=4 SV=1 - [G5KX48_STRSU]	transporter activity	membrane	transport	1.70511	0.000866707
G7SA68	UDP-N-acetylmuramate--alanine ligase OS=Streptococcus suis D9 GN=murC PE=3 SV=1 - [G7SA68_STRSU]	nucleotide binding; catalytic activity	cytoplasm; membrane	cell organization and biogenesis; regulation of biological process; metabolic process; cell division	0.656503	0.00290378
A2VC10	Muramidase-released protein (Fragment) OS=Streptococcus suis GN=MRP PE=3 SV=1 - [A2VC10_STRSU]		extracellular; membrane		1.04403	0.790489
G7S1P6	Putative uncharacterized protein OS=Streptococcus suis SS12 GN=SSU12_1217 PE=4 SV=1 - [G7S1P6_STRSU]	catalytic activity		metabolic process	1.08421	0.615953
G7S731	D-mannonate oxidoreductase OS=Streptococcus suis SS12 GN=SSU12_1066 PE=3 SV=1 - [G7S731_STRSU]	nucleotide binding; catalytic activity		metabolic process	1.33343	0.0727555
G5L1V6	50S ribosomal protein L9 OS=Streptococcus suis R61 GN=rplI PE=3 SV=1 - [G5L1V6_STRSU]	RNA binding; structural molecule activity	cytoplasm; ribosome	metabolic process	0.663882	0.00374636
G7S6X0	IS200 family transposase OS=Streptococcus suis SS12 GN=SSU12_1005 PE=4 SV=1 - [G7S6X0_STRSU]	DNA binding; catalytic activity		metabolic process	0.899292	0.450801
B9WY96	NLPA lipoprotein OS=Streptococcus suis 89/1591 GN=SsuiDRAFT_2033 PE=4 SV=1 - [B9WY96_STRSU]				0.751111	0.0427212
B9WTY9	Probable thiol peroxidase OS=Streptococcus suis 89/1591 GN=tpx PE=3 SV=1 - [B9WTY9_STRSU]	antioxidant activity; catalytic activity		cellular homeostasis; regulation of biological process; metabolic process	1.09692	0.565685
M1UAA1	Phosphate ABC transporter permease OS=Streptococcus suis SC070731 GN=NJAUSS_1025 PE=3 SV=1 - [M1UAA1_STRSU]	transporter activity	membrane	transport	0.785086	0.0865652
M1UAC1	Uncharacterized protein OS=Streptococcus suis SC070731 GN=NJAUSS_1055 PE=4 SV=1 - [M1UAC1_STRSU]				0.73431	0.0287949
G5L3D2	Response regulator OS=Streptococcus suis SC070731 GN=NJAUSS_1018 PE=4 SV=1 - [M1UV22_STRSU]	nucleotide binding; catalytic activity	membrane	metabolic process	0.744331	0.0365729
A4US38	Inosine-5'-monophosphate dehydrogenase OS=Streptococcus suis PE=4 SV=1 - [A4US38_STRSU]				0.816408	0.150616
G7S621	Putative 5-formyltetrahydrofolate cyclo-ligase OS=Streptococcus suis SS12 GN=SSU12_1979 PE=4 SV=1 - [G7S621_STRSU]	nucleotide binding; catalytic activity		metabolic process	0.94023	0.660294
G7SKY1	Bifunctional protein FolD OS=Streptococcus suis ST1 GN=folD PE=3 SV=1 - [G7SKY1_STRSU]	nucleotide binding; catalytic activity		metabolic process	1.11582	0.495753
M1UMR0	Amino acid (Glutamine) ABC transporter permease OS=Streptococcus suis SC070731 GN=NJAUSS_0518 PE=3 SV=1 - [M1UMR0_STRSU]	transporter activity	membrane	transport	0.957679	0.756887
G5L1H0	Dps-like peroxide resistance protein Dpr OS=Streptococcus suis R61 GN=dpr PE=3 SV=1 - [G5L1H0_STRSU]	metal ion binding; catalytic activity	membrane	cellular homeostasis; response to stimulus; metabolic process	1.04951	0.76539
A4W1G9	Phosphotransferase system cellobiose-specific component IIC OS=Streptococcus suis (strain 98HAH33) GN=SSU98_1050 PE=4 SV=1 - [A4W1G9_STRS2]	transporter activity; catalytic activity	membrane	transport	0.521547	4.14584e-06
B0M0F2	Transcriptional regulator (Fragment) OS=Streptococcus suis PE=4 SV=1 - [B0M0F2_STRSU]	DNA binding			1.18767	0.284135
G7S4V8	ABC-type dipeptide/oligopeptide/nickel transport system, permease component OS=Streptococcus suis SS12 GN=SSU12_1802 PE=3 SV=1 - [G7S4V8_STRSU]	transporter activity	membrane	transport	0.941473	0.667072
A4VYQ1	50S ribosomal protein L29 OS=Streptococcus suis (strain 98HAH33) GN=rpmC PE=3 SV=1 - [RL29_STRS2]	structural molecule activity	cytoplasm; ribosome	metabolic process	1.10164	0.547656
A4W398	Hemolysins and related proteins containing CBS domains OS=Streptococcus suis (strain 98HAH33) GN=SSU98_1679 PE=4 SV=1 - [A4W398_STRS2]	protein binding; nucleotide binding			0.842247	0.223535
G7S801	Uronate isomerase OS=Streptococcus suis D9 GN=uxaC PE=3 SV=1 - [G7S801_STRSU]	catalytic activity		metabolic process	1.48338	0.0138864
E8UPI2	Type I site-specific restriction-modification system, R (Restriction) subunit and related helicase OS=Streptococcus suis (strain JS14) GN=SSUJS14_1749 PE=4 SV=1 - [E8UPI2_STREJ]	nucleotide binding; DNA binding; catalytic activity		metabolic process; defense response; response to stimulus	0.950694	0.717876
G7SJQ2	Leucine--tRNA ligase OS=Streptococcus suis ST1 GN=leuS PE=3 SV=1 - [G7SJQ2_STRSU]	nucleotide binding; catalytic activity	cytoplasm; membrane	metabolic process; regulation of biological process	0.993243	0.958602
B9WVA3	Substrate-binding region of ABC-type glycine betaine transport system OS=Streptococcus suis 89/1591 GN=SsuiDRAFT_2943 PE=3 SV=1 - [B9WVA3_STRSU]	transporter activity	membrane	transport	0.890605	0.410692
G7S629	Cytosine/adenosine deaminase OS=Streptococcus suis SS12 GN=SSU12_1987 PE=4 SV=1 - [G7S629_STRSU]	catalytic activity; metal ion binding		metabolic process	1.15561	0.368061
A4W3V8	Ketol-acid reductoisomerase OS=Streptococcus suis (strain 98HAH33) GN=ilvC PE=3 SV=1 - [ILVC_STRS2]	catalytic activity		metabolic process	0.793961	0.102181
G5L199	MATE family efflux protein OS=Streptococcus suis R61 GN=SSUR61_1880 PE=4 SV=1 - [G5L199_STRSU]	transporter activity	membrane	response to stimulus; transport	1.28699	0.115751
R4NWB6	Uncharacterized protein OS=Streptococcus suis TL13 GN=TL13_1734 PE=4 SV=1 - [R4NWB6_STRSU]				8.30694	6.37839e-40
G5KYG0	ABC transporter permease protein OS=Streptococcus suis R61 GN=SSUR61_0687 PE=4 SV=1 - [G5KYG0_STRSU]		membrane		0.859417	0.282567
G7S5G7	Branched-chain-amino-acid aminotransferase OS=Streptococcus suis SS12 GN=SSU12_0717 PE=3 SV=1 - [G7S5G7_STRSU]	catalytic activity		metabolic process	0.945978	0.69178
M1U8K6	Transcriptional regulator OS=Streptococcus suis SC070731 GN=NJAUSS_0256 PE=4 SV=1 - [M1U8K6_STRSU]				1.21433	0.226374
R4NNJ5	Preprotein translocase subunit SecE OS=Streptococcus suis TL13 GN=secE PE=4 SV=1 - [R4NNJ5_STRSU]				1.20675	0.241736
G7S6U4	Probable inorganic polyphosphate/ATP-NAD kinase OS=Streptococcus suis SS12 GN=ppnK PE=3 SV=1 - [G7S6U4_STRSU]	nucleotide binding; catalytic activity; metal ion binding	cytoplasm	metabolic process	0.995842	0.973319
G7S2T8	Alcohol dehydrogenase OS=Streptococcus suis SS12 GN=adhA PE=3 SV=1 - [G7S2T8_STRSU]	nucleotide binding; metal ion binding; catalytic activity		metabolic process	0.610195	0.000474693
G5KX79	2-dehydro-3-deoxy-6-phosphogalactonate aldolase OS=Streptococcus suis R61 GN=dgoA PE=4 SV=1 - [G5KX79_STRSU]	catalytic activity	membrane	metabolic process	0.996189	0.975282
G7S5M1	Nicotinamide mononucleotide transporter OS=Streptococcus suis SS12 GN=SSU12_1910 PE=4 SV=1 - [G7S5M1_STRSU]	transporter activity	membrane	transport	1.27523	0.129646
B3VLB5	Elongation factor Ts (Fragment) OS=Streptococcus suis GN=efts PE=3 SV=1 - [B3VLB5_STRSU]	RNA binding; protein binding	cytoplasm	metabolic process	1.29227	0.109944
E8UNR8	30S ribosomal protein S20 OS=Streptococcus suis (strain JS14) GN=rpsT PE=3 SV=1 - [E8UNR8_STREJ]	RNA binding; structural molecule activity	cytoplasm; ribosome	metabolic process	1.11041	0.515188
G5KWZ0	5'-nucleotidase OS=Streptococcus suis R61 GN=sntC PE=3 SV=1 - [G5KWZ0_STRSU]	nucleotide binding; catalytic activity; metal ion binding	extracellular; membrane	metabolic process	0.767348	0.0607525
A4W0I7	4-hydroxy-tetrahydrodipicolinate synthase OS=Streptococcus suis (strain 98HAH33) GN=dapA PE=3 SV=1 - [DAPA_STRS2]	catalytic activity	cytoplasm	metabolic process	0.724764	0.0226819
R4NLJ6	Oligopeptide ABC transporter, periplasmic oligopeptide-binding protein OppA OS=Streptococcus suis TL13 GN=oppA PE=4 SV=1 - [R4NLJ6_STRSU]				0.644177	0.00186025
G7SK70	ADP-glucose pyrophosphorylase OS=Streptococcus suis ST1 GN=SSUST1_0929 PE=4 SV=1 - [G7SK70_STRSU]	catalytic activity		metabolic process	1.05469	0.742053
A4VVK6	Sphingosine kinase and enzymes related to eukaryotic diacylglycerol kinase OS=Streptococcus suis (strain 05ZYH33) GN=SSU05_1179 PE=4 SV=1 - [A4VVK6_STRSY]	catalytic activity		cell communication; regulation of biological process; response to stimulus; metabolic process	0.996466	0.976852
M1UV22	Response regulator OS=Streptococcus suis SC070731 GN=NJAUSS_1018 PE=4 SV=1 - [M1UV22_STRSU]	signal transducer activity; DNA binding		cell communication; regulation of biological process; response to stimulus; metabolic process	0.891941	0.416745
G7S191	Phosphocarrier protein HPr OS=Streptococcus suis SS12 GN=SSU12_1105 PE=4 SV=1 - [G7S191_STRSU]	catalytic activity; transporter activity	cytoplasm	transport; metabolic process	0.984033	0.906271
G7S4T2	Branched-chain alpha-keto acid dehydrogenase subunit E2 OS=Streptococcus suis SS12 GN=SSU12_1776 PE=3 SV=1 - [G7S4T2_STRSU]	catalytic activity		metabolic process	1.67303	0.00131858
G7S660	High-affinity zinc uptake system protein znuA OS=Streptococcus suis SS12 GN=SSU12_2018 PE=3 SV=1 - [G7S660_STRSU]	metal ion binding		transport	1.06386	0.701534
B9WSL5	Sua5/YciO/YrdC/YwlC family protein OS=Streptococcus suis 89/1591 GN=SsuiDRAFT_3848 PE=4 SV=1 - [B9WSL5_STRSU]	RNA binding			1.33526	0.0714044
G7S506	Metal-dependent membrane protease OS=Streptococcus suis SS12 GN=SSU12_0632 PE=4 SV=1 - [G7S506_STRSU]	catalytic activity	membrane	metabolic process	1.0876	0.602276
M1UBI4	Trk family potassium uptake protein OS=Streptococcus suis SC070731 GN=NJAUSS_1624 PE=4 SV=1 - [M1UBI4_STRSU]	transporter activity		transport	0.970924	0.83171
G5KYZ8	Galactose-6-phosphate isomerase LacA subunit 1 OS=Streptococcus suis R61 GN=lacA1 PE=3 SV=1 - [G5KYZ8_STRSU]	catalytic activity		metabolic process	0.912412	0.514571
G7S6T1	Sugar metabolism transcriptional regulator OS=Streptococcus suis SS12 GN=SSU12_0966 PE=4 SV=1 - [G7S6T1_STRSU]	DNA binding; catalytic activity		metabolic process; regulation of biological process	0.995555	0.971699
F4ECW4	tRNA and rRNA cytosine-C5-methylase OS=Streptococcus suis GN=SSUST3_0421 PE=3 SV=1 - [F4ECW4_STRSU]	RNA binding; catalytic activity	cytoplasm	metabolic process; regulation of biological process	0.954887	0.741249
F4EE86	Putative uncharacterized protein OS=Streptococcus suis GN=SSUST3_0663 PE=4 SV=1 - [F4EE86_STRSU]				1.14316	0.405183
C6GT81	Uncharacterized protein OS=Streptococcus suis (strain BM407) GN=SSUBM407_1010 PE=4 SV=1 - [C6GT81_STRS4]	catalytic activity; nucleotide binding; metal ion binding			1.05101	0.758617
A4W3A8	Phosphopantetheine adenylyltransferase OS=Streptococcus suis (strain 98HAH33) GN=coaD PE=3 SV=1 - [COAD_STRS2]	nucleotide binding; catalytic activity	cytoplasm	metabolic process	0.88596	0.389993
A4W013	Methyl-accepting chemotaxis protein OS=Streptococcus suis (strain 98HAH33) GN=SSU98_0544 PE=4 SV=1 - [A4W013_STRS2]		extracellular; membrane		0.938607	0.651473
G7S5U4	Tagatose-6-phosphate kinase OS=Streptococcus suis SS12 GN=SSU12_0766 PE=3 SV=1 - [G7S5U4_STRSU]	catalytic activity		metabolic process	1.34657	0.0635067
G7SDG9	Laminin binding protein OS=Streptococcus suis D12 GN=lmb PE=3 SV=1 - [G7SDG9_STRSU]	metal ion binding		transport	1.52459	0.00850321
B9WVY1	Acetolactate synthase, small subunit OS=Streptococcus suis 89/1591 GN=SsuiDRAFT_2879 PE=4 SV=1 - [B9WVY1_STRSU]	catalytic activity		metabolic process	0.938485	0.65081
G7S199	Transcriptional regulator OS=Streptococcus suis SS12 GN=SSU12_1113 PE=4 SV=1 - [G7S199_STRSU]	DNA binding		metabolic process; regulation of biological process	1.03316	0.841247
G7S4W1	Putative oligopeptide-binding protein OppA OS=Streptococcus suis SS12 GN=oppA PE=4 SV=1 - [G7S4W1_STRSU]	transporter activity		transport	0.902703	0.467025
C6GVK0	Sensor histidine kinase protein OS=Streptococcus suis (strain BM407) GN=SSUBM407_1485 PE=4 SV=1 - [C6GVK0_STRS4]	catalytic activity; receptor activity; signal transducer activity; nucleotide binding	membrane	cell communication; regulation of biological process; response to stimulus; metabolic process	1.02622	0.874331
G7S5M4	Transcriptional regulator CtsR OS=Streptococcus suis SS12 GN=SSU12_1913 PE=4 SV=1 - [G7S5M4_STRSU]				1.05619	0.735357
G7SA55	Non-canonical purine NTP pyrophosphatase OS=Streptococcus suis D9 GN=SSUD9_1714 PE=3 SV=1 - [G7SA55_STRSU]	nucleotide binding; catalytic activity; metal ion binding		metabolic process	0.85404	0.263174
M1UC12	Fructose-2,6-bisphosphatase OS=Streptococcus suis SC070731 GN=NJAUSS_1876 PE=4 SV=1 - [M1UC12_STRSU]				1.40311	0.0346347
G7S5Y7	Putative uncharacterized protein OS=Streptococcus suis SS12 GN=SSU12_0809 PE=4 SV=1 - [G7S5Y7_STRSU]				0.810044	0.135527
G5L1E2	Putative aminodeoxychorismate lyase OS=Streptococcus suis R61 GN=SSUR61_1924 PE=4 SV=1 - [G5L1E2_STRSU]	catalytic activity	membrane		1.07718	0.644826
G7S2K9	Cytotoxic translational repressor of toxin-antitoxin stability system OS=Streptococcus suis SS12 GN=SSU12_1385 PE=4 SV=1 - [G7S2K9_STRSU]				0.834858	0.20074
A4VVL8	Ribonuclease 3 OS=Streptococcus suis (strain 05ZYH33) GN=rnc PE=3 SV=1 - [A4VVL8_STRSY]	RNA binding; catalytic activity; metal ion binding	cytoplasm	metabolic process	0.949418	0.710795
G7S568	Putative uncharacterized protein OS=Streptococcus suis SS12 GN=SSU12_1832 PE=4 SV=1 - [G7S568_STRSU]	catalytic activity; nucleotide binding		metabolic process	0.756321	0.0479768
F4EED0	Ribosomal RNA small subunit methyltransferase E OS=Streptococcus suis GN=SSUST3_1939 PE=3 SV=1 - [F4EED0_STRSU]	catalytic activity	cytoplasm	metabolic process	0.838371	0.211383
G7S6Q9	Histone acetyltransferase HPA2-like acetyltransferase OS=Streptococcus suis SS12 GN=SSU12_0944 PE=4 SV=1 - [G7S6Q9_STRSU]	catalytic activity			0.988756	0.933131
G7RX00	Alpha/beta superfamily hydrolase/acyltransferase OS=Streptococcus suis A7 GN=SSUA7_0300 PE=4 SV=1 - [G7RX00_STRSU]	catalytic activity		metabolic process	0.980475	0.886024
E8UKQ0	Adenosine deaminase OS=Streptococcus suis (strain JS14) GN=SSUJS14_0501 PE=3 SV=1 - [E8UKQ0_STREJ]	catalytic activity; metal ion binding		metabolic process	0.893886	0.425629
G7SAL2	3-oxoacyl-[acyl-carrier-protein] synthase 2 OS=Streptococcus suis D9 GN=fabF PE=3 SV=1 - [G7SAL2_STRSU]	catalytic activity		metabolic process	1.38895	0.0404394
G7S6Q2	Glucose-1-phosphate adenylyltransferase OS=Streptococcus suis SS12 GN=SSU12_0937 PE=3 SV=1 - [G7S6Q2_STRSU]	nucleotide binding; catalytic activity		metabolic process	0.996175	0.975207
G7S5Y0	GTPase subunit of restriction endonuclease OS=Streptococcus suis SS12 GN=SSU12_0802 PE=4 SV=1 - [G7S5Y0_STRSU]	nucleotide binding; catalytic activity		metabolic process	0.955867	0.746729
R4NW21	Uncharacterized protein OS=Streptococcus suis TL13 GN=TL13_1669 PE=4 SV=1 - [R4NW21_STRSU]				1.03258	0.844023
G7S643	ABC-type amino acid transport system, permease component OS=Streptococcus suis SS12 GN=SSU12_2001 PE=3 SV=1 - [G7S643_STRSU]	transporter activity	membrane	transport	0.840887	0.219224
J7KGR5	Transcriptional activator OS=Streptococcus suis S735 GN=YYK_01050 PE=4 SV=1 - [J7KGR5_STRSU]	DNA binding			0.978768	0.876309
M1UUE4	Integral membrane protein OS=Streptococcus suis SC070731 GN=NJAUSS_0734 PE=4 SV=1 - [M1UUE4_STRSU]				1.04775	0.773443
G5L259	NADP-dependent glyceraldehyde-3-phosphate dehydrogenase, putative OS=Streptococcus suis R61 GN=SSUR61_2265 PE=3 SV=1 - [G5L259_STRSU]	catalytic activity	membrane	metabolic process	2.7811	1.68977e-10
G7S447	Putative uncharacterized protein OS=Streptococcus suis SS12 GN=SSU12_0485 PE=4 SV=1 - [G7S447_STRSU]				1.23951	0.180892
G5KYG9	ABC-type spermidine/putrescine transport system, ATPase component OS=Streptococcus suis R61 GN=SSUR61_0696 PE=3 SV=1 - [G5KYG9_STRSU]	nucleotide binding; catalytic activity; transporter activity	membrane	metabolic process; transport	0.985727	0.915909
G7S469	Signal peptidase I OS=Streptococcus suis SS12 GN=SSU12_0507 PE=3 SV=1 - [G7S469_STRSU]	catalytic activity	membrane	metabolic process	1.03949	0.811554
E8UQA3	Phosphotransferase system cellobiose-specific component IIB OS=Streptococcus suis (strain JS14) GN=SSUJS14_2030 PE=4 SV=1 - [E8UQA3_STREJ]	catalytic activity; transporter activity		transport	0.894801	0.429844
G5KZR3	Glutathione S-transferase OS=Streptococcus suis R61 GN=SSUR61_1238 PE=4 SV=1 - [G5KZR3_STRSU]	catalytic activity			3.26239	1.53088e-13
G5L022	Putative uncharacterized protein OS=Streptococcus suis R61 GN=SSUR61_1349 PE=4 SV=1 - [G5L022_STRSU]		membrane		1.09389	0.577407
G7S5M3	ATPases with chaperone activity, ATP-binding subunit OS=Streptococcus suis SS12 GN=SSU12_1912 PE=3 SV=1 - [G7S5M3_STRSU]	nucleotide binding; catalytic activity		metabolic process	1.0011	0.997364
G7S4X6	Glutathione peroxidase OS=Streptococcus suis SS12 GN=SSU12_0602 PE=3 SV=1 - [G7S4X6_STRSU]	antioxidant activity; catalytic activity		response to stimulus; metabolic process	0.738041	0.0315185
G7SLY6	Putative uncharacterized protein OS=Streptococcus suis ST1 GN=SSUST1_1059 PE=4 SV=1 - [G7SLY6_STRSU]				1.08209	0.624564
A4W120	Uncharacterized protein conserved in bacteria OS=Streptococcus suis (strain 98HAH33) GN=SSU98_0901 PE=4 SV=1 - [A4W120_STRS2]				0.884061	0.381689
G7S3G9	Response regulator OS=Streptococcus suis SS12 GN=SSU12_1541 PE=4 SV=1 - [G7S3G9_STRSU]	signal transducer activity; DNA binding		cell communication; regulation of biological process; response to stimulus; metabolic process	0.939399	0.655774
A4W4K6	ABC-type maltose transport system, permease component OS=Streptococcus suis (strain 98HAH33) GN=SSU98_2137 PE=3 SV=1 - [A4W4K6_STRS2]	transporter activity	membrane	transport	0.913649	0.520768
D5AFR8	Thioredoxin OS=Streptococcus suis (strain GZ1) GN=SSGZ1_0218 PE=4 SV=1 - [D5AFR8_STRGZ]	catalytic activity		metabolic process; cellular homeostasis; regulation of biological process	0.876403	0.349133
G7S395	RNA-binding protein OS=Streptococcus suis SS12 GN=SSU12_0343 PE=4 SV=1 - [G7S395_STRSU]	RNA binding			0.895468	0.432926
A4W3W3	Dihydroxy-acid dehydratase OS=Streptococcus suis (strain 98HAH33) GN=ilvD PE=3 SV=1 - [ILVD_STRS2]	catalytic activity; metal ion binding		metabolic process	1	0.996808
G7S6Q5	1,4-alpha-glucan branching enzyme OS=Streptococcus suis SS12 GN=SSU12_0940 PE=4 SV=1 - [G7S6Q5_STRSU]	catalytic activity		metabolic process	1.06932	0.677981
G5KZ86	Phosphatidylserine/phosphatidylglycerophosphate/ cardiolipin synthase-like protein OS=Streptococcus suis R61 GN=SSUR61_0950 PE=3 SV=1 - [G5KZ86_STRSU]	catalytic activity	membrane	metabolic process	1.96549	2.45962e-05
G7S1H7	Putative uncharacterized protein OS=Streptococcus suis SS12 GN=SSU12_0036 PE=4 SV=1 - [G7S1H7_STRSU]				0.804117	0.122454
B9WVK6	Initiation factor 3 (Fragment) OS=Streptococcus suis 89/1591 GN=SsuiDRAFT_3002 PE=4 SV=1 - [B9WVK6_STRSU]	RNA binding		metabolic process	1.19858	0.259232
A4W1V6	ATP synthase epsilon chain OS=Streptococcus suis (strain 98HAH33) GN=atpC PE=3 SV=1 - [ATPE_STRS2]	nucleotide binding; catalytic activity; transporter activity	membrane	metabolic process; transport	0.962079	0.781641
M1UNZ6	NTP pyrophosphohydrolase including oxidative damage repair enzyme OS=Streptococcus suis SC070731 GN=NJAUSS_0957 PE=4 SV=1 - [M1UNZ6_STRSU]	catalytic activity			1.11138	0.511669
M1TJF5	ABC transporter permease OS=Streptococcus suis SC070731 GN=NJAUSS_1006 PE=4 SV=1 - [M1TJF5_STRSU]	transporter activity	membrane	transport	0.791968	0.0985078
G5L0R3	Transposase IS116/IS110/IS902 family protein OS=Streptococcus suis R61 GN=SSUR61_1692 PE=4 SV=1 - [G5L0R3_STRSU]	DNA binding; catalytic activity		metabolic process	0.716532	0.0183014
A4VVT3	Uncharacterized protein OS=Streptococcus suis (strain 05ZYH33) GN=SSU05_1256 PE=4 SV=1 - [A4VVT3_STRSY]				0.775778	0.072164
G7SDR3	Rhamnan synthesis protein F family protein OS=Streptococcus suis D12 GN=SSUD12_0668 PE=4 SV=1 - [G7SDR3_STRSU]		membrane		1.0239	0.885494
G7RZ76	Oxygen-sensitive ribonucleoside-triphosphate reductase OS=Streptococcus suis A7 GN=SSUA7_0679 PE=4 SV=1 - [G7RZ76_STRSU]	nucleotide binding			1.02137	0.897689
G7SLT6	Catabolite control protein A OS=Streptococcus suis ST1 GN=ccpA PE=4 SV=1 - [G7SLT6_STRSU]	DNA binding		metabolic process; regulation of biological process	0.930422	0.607524
G7S462	Transcriptional regulator OS=Streptococcus suis SS12 GN=SSU12_0500 PE=4 SV=1 - [G7S462_STRSU]	DNA binding		metabolic process; regulation of biological process	1.00939	0.956232
G7S4N9	Histone acetyltransferase HPA2-like acetyltransferase OS=Streptococcus suis SS12 GN=SSU12_1733 PE=4 SV=1 - [G7S4N9_STRSU]	catalytic activity			0.976162	0.861482
A4VVN0	Citrate synthase OS=Streptococcus suis (strain 05ZYH33) GN=SSU05_1204 PE=3 SV=1 - [A4VVN0_STRSY]	catalytic activity	cytoplasm	metabolic process	1.0328	0.842952
A4W222	Uncharacterized conserved protein OS=Streptococcus suis (strain 98HAH33) GN=SSU98_1253 PE=4 SV=1 - [A4W222_STRS2]				1.07554	0.651662
G5KYR4	Putative uncharacterized protein OS=Streptococcus suis R61 GN=SSUR61_0791 PE=4 SV=1 - [G5KYR4_STRSU]				1.2508	0.163116
R4NUZ4	Universal stress protein OS=Streptococcus suis TL13 GN=TL13_0384 PE=3 SV=1 - [R4NUZ4_STRSU]				0.820253	0.160273
M1TK42	Uncharacterized protein OS=Streptococcus suis SC070731 GN=NJAUSS_1317 PE=4 SV=1 - [M1TK42_STRSU]				1.15052	0.382935
G7RZP1	Thymidine kinase OS=Streptococcus suis A7 GN=tdk PE=3 SV=1 - [G7RZP1_STRSU]	nucleotide binding; catalytic activity; metal ion binding	cytoplasm	metabolic process	1.12969	0.448221
J7KIL9	Regulatory protein spx OS=Streptococcus suis S735 GN=spxA PE=3 SV=1 - [J7KIL9_STRSU]		cytoplasm	metabolic process; regulation of biological process	1.00137	0.996003
F4EF34	HAD superfamily hydrolase OS=Streptococcus suis GN=SSUST3_0882 PE=4 SV=1 - [F4EF34_STRSU]	catalytic activity		metabolic process	0.961155	0.776434
A4VYG8	Ribosomal RNA large subunit methyltransferase H OS=Streptococcus suis (strain 05ZYH33) GN=rlmH PE=3 SV=2 - [RLMH_STRSY]	catalytic activity	cytoplasm; membrane	metabolic process	0.988842	0.933623
G7S413	Putative uncharacterized protein OS=Streptococcus suis SS12 GN=SSU12_0451 PE=4 SV=1 - [G7S413_STRSU]				1.07083	0.671527
G5L0I4	Arginine repressor OS=Streptococcus suis R61 GN=argR PE=3 SV=1 - [G5L0I4_STRSU]	DNA binding	cytoplasm	metabolic process; regulation of biological process; cell organization and biogenesis	0.9642	0.793618
G7S5J6	Homoserine dehydrogenase OS=Streptococcus suis SS12 GN=hom PE=3 SV=1 - [G7S5J6_STRSU]	nucleotide binding; catalytic activity		metabolic process	0.902307	0.465128
G5KZV1	Putative uncharacterized protein OS=Streptococcus suis R61 GN=SSUR61_1277 PE=4 SV=1 - [G5KZV1_STRSU]	nucleotide binding	membrane		0.7842	0.0851082
A4VXV9	Subtilisin-like serine protease OS=Streptococcus suis (strain 05ZYH33) GN=SSU05_1982 PE=3 SV=1 - [A4VXV9_STRSY]	catalytic activity	extracellular; membrane	metabolic process	1.17303	0.320434
B9WUZ8	Putative uncharacterized protein OS=Streptococcus suis 89/1591 GN=SsuiDRAFT_3152 PE=4 SV=1 - [B9WUZ8_STRSU]				1.05418	0.744316
C6GMK6	Response regulator protein OS=Streptococcus suis (strain SC84) GN=vicR PE=4 SV=1 - [C6GMK6_STRSX]	signal transducer activity; DNA binding		cell communication; regulation of biological process; response to stimulus; metabolic process	0.916338	0.534339
G7S519	Pyridine nucleotide-disulfide oxidoreductase OS=Streptococcus suis SS12 GN=SSU12_0647 PE=3 SV=1 - [G7S519_STRSU]	catalytic activity; nucleotide binding	cytoplasm	cellular homeostasis; regulation of biological process; metabolic process	0.917287	0.539163
G7S538	Aspartate-semialdehyde dehydrogenase OS=Streptococcus suis SS12 GN=asd PE=3 SV=1 - [G7S538_STRSU]	nucleotide binding; catalytic activity; protein binding	cytoplasm	metabolic process	0.890084	0.408344
G7RYV8	Phosphomannomutase OS=Streptococcus suis A7 GN=SSUA7_0640 PE=3 SV=1 - [G7RYV8_STRSU]	metal ion binding; catalytic activity		metabolic process	0.846292	0.236681
Q9F1S0	Restriction endonuclease SsuRB (Fragment) OS=Streptococcus suis GN=ssuRB PE=4 SV=1 - [Q9F1S0_STRSU]	DNA binding; catalytic activity		defense response; metabolic process; response to stimulus	1.4723	0.0158076
G7SJZ8	Methionyl-tRNA formyltransferase OS=Streptococcus suis ST1 GN=fmt PE=3 SV=1 - [G7SJZ8_STRSU]	catalytic activity	membrane	metabolic process	0.724729	0.0226621
M1UM51	HAD superfamily hydrolase OS=Streptococcus suis SC070731 GN=NJAUSS_0248 PE=4 SV=1 - [M1UM51_STRSU]	catalytic activity		metabolic process	1.17739	0.309267
G7S726	Histone acetyltransferase HPA2-like acetyltransferase OS=Streptococcus suis SS12 GN=SSU12_1061 PE=4 SV=1 - [G7S726_STRSU]	catalytic activity			0.833715	0.197354
A4VZH0	Galactokinase OS=Streptococcus suis (strain 98HAH33) GN=galK PE=3 SV=1 - [A4VZH0_STRS2]	nucleotide binding; metal ion binding; catalytic activity	cytoplasm	metabolic process	1.37687	0.046084
A4VTY9	Uncharacterized protein conserved in bacteria OS=Streptococcus suis (strain 05ZYH33) GN=SSU05_0612 PE=4 SV=1 - [A4VTY9_STRSY]	metal ion binding		metabolic process	0.737758	0.0313048
C6GU34	Putative activated D-alanine transport protein OS=Streptococcus suis (strain BM407) GN=dltB PE=4 SV=1 - [C6GU34_STRS4]		membrane		1.24407	0.173536
G7S5P6	Multidrug ABC transporter, ATP-binding protein OS=Streptococcus suis SS12 GN=SSU12_1935 PE=3 SV=1 - [G7S5P6_STRSU]	nucleotide binding; catalytic activity; transporter activity	membrane	metabolic process; transport	0.827138	0.178594
A4VX42	Membrane protein insertase YidC OS=Streptococcus suis (strain 05ZYH33) GN=yidC PE=3 SV=1 - [A4VX42_STRSY]		membrane	transport; cell organization and biogenesis	1.02174	0.895882
A4W3Q2	30S ribosomal protein S6 OS=Streptococcus suis (strain 98HAH33) GN=rpsF PE=3 SV=1 - [RS6_STRS2]	RNA binding; structural molecule activity	cytoplasm; ribosome	metabolic process	1.016	0.923799
G7S2P2	Ribonuclease HIII OS=Streptococcus suis SS12 GN=rnhC PE=3 SV=1 - [G7S2P2_STRSU]	metal ion binding; RNA binding; catalytic activity	cytoplasm	metabolic process	1.08492	0.613073
Q8GG79	Ornithine carbamoyltransferase, catabolic OS=Streptococcus suis GN=arcB PE=3 SV=2 - [OTCC_STRSU]	catalytic activity	cytoplasm	metabolic process	0.787616	0.0908239
D5AGQ3	Cps2A OS=Streptococcus suis (strain GZ1) GN=SSGZ1_0555 PE=4 SV=1 - [D5AGQ3_STRGZ]		membrane	metabolic process	0.962599	0.784574
A4W1N1	Putative phosphate ABC transporter (Permease protein) OS=Streptococcus suis (strain 98HAH33) GN=SSU98_1112 PE=3 SV=1 - [A4W1N1_STRS2]	transporter activity	membrane	transport	0.965981	0.803689
A8CUL3	Integrase OS=Streptococcus suis GN=int-Tn PE=4 SV=1 - [A8CUL3_STRSU]	DNA binding; catalytic activity		metabolic process	0.46773	7.72153e-08
G5KXT6	Prolipoprotein diacylglyceryl transferase OS=Streptococcus suis R61 GN=lgt PE=3 SV=1 - [G5KXT6_STRSU]	catalytic activity	membrane	metabolic process	0.891218	0.413462
G7S6R6	ABC transporter ATPase OS=Streptococcus suis SS12 GN=SSU12_0951 PE=3 SV=1 - [G7S6R6_STRSU]	nucleotide binding; catalytic activity		metabolic process	1.39323	0.0385972
G7S4V9	ABC-type oligopeptide transport system, ATPase component OS=Streptococcus suis SS12 GN=SSU12_1803 PE=3 SV=1 - [G7S4V9_STRSU]	nucleotide binding; catalytic activity		metabolic process; transport	0.909967	0.502414
G5KYW8	Small-conductance mechanosensitive channel OS=Streptococcus suis R61 GN=SSUR61_0832 PE=4 SV=1 - [G5KYW8_STRSU]		membrane	transport	1.05903	0.722738
A4VU17	D-alanine--poly(phosphoribitol) ligase subunit 2 OS=Streptococcus suis (strain 05ZYH33) GN=dltC PE=3 SV=1 - [DLTC_STRSY]	nucleotide binding; catalytic activity		cell organization and biogenesis; regulation of biological process; metabolic process	1.09205	0.584626
B9WT11	PTS system, lactose-specific IIa component OS=Streptococcus suis 89/1591 GN=SsuiDRAFT_3732 PE=4 SV=1 - [B9WT11_STRSU]	transporter activity	membrane	transport	0.939039	0.653815
G7S214	Integral membrane protein OS=Streptococcus suis SS12 GN=SSU12_1270 PE=4 SV=1 - [G7S214_STRSU]				1.08274	0.621909
G7S595	Uridine phosphorylase OS=Streptococcus suis SS12 GN=SSU12_1861 PE=4 SV=1 - [G7S595_STRSU]	catalytic activity		metabolic process	0.83781	0.20966
R4NW63	Transcriptional regulator, GntR family OS=Streptococcus suis TL13 GN=TL13_0803 PE=4 SV=1 - [R4NW63_STRSU]				0.938695	0.651952
A4W3D2	Segregation and condensation protein A OS=Streptococcus suis (strain 98HAH33) GN=scpA PE=3 SV=1 - [SCPA_STRS2]		cytoplasm	cell division	0.960409	0.77223
G7S218	Putative uncharacterized protein OS=Streptococcus suis SS12 GN=SSU12_1274 PE=4 SV=1 - [G7S218_STRSU]		membrane		0.873037	0.335315
D5AIH0	Polysaccharide biosynthesis protein OS=Streptococcus suis (strain GZ1) GN=SSGZ1_1178 PE=4 SV=1 - [D5AIH0_STRGZ]		membrane	metabolic process	0.907041	0.488022
M1UBG0	Acylphosphatase OS=Streptococcus suis SC070731 GN=NJAUSS_1584 PE=3 SV=1 - [M1UBG0_STRSU]				0.960743	0.774112
R4NI08	Formate/nitrite transporter OS=Streptococcus suis TL13 GN=TL13_0294 PE=4 SV=1 - [R4NI08_STRSU]				0.902267	0.464933
G7SMT1	Putative sulfatase OS=Streptococcus suis ST1 GN=SSUST1_0698 PE=4 SV=1 - [G7SMT1_STRSU]	catalytic activity	membrane	metabolic process	1.06793	0.683946
G5L0W2	Acetolactate synthase OS=Streptococcus suis R61 GN=SSUR61_1742 PE=3 SV=1 - [G5L0W2_STRSU]	metal ion binding; catalytic activity; nucleotide binding	membrane	metabolic process	1.16597	0.339151
A4VU39	ATPase involved in DNA replication OS=Streptococcus suis (strain 05ZYH33) GN=SSU05_0662 PE=4 SV=1 - [A4VU39_STRSY]	catalytic activity		metabolic process	0.956443	0.749957
G7S221	Putative uncharacterized protein OS=Streptococcus suis SS12 GN=SSU12_1277 PE=4 SV=1 - [G7S221_STRSU]				0.998504	0.988365
G7S2D9	Beta-lactamase class C-related penicillin binding protein OS=Streptococcus suis SS12 GN=SSU12_0193 PE=4 SV=1 - [G7S2D9_STRSU]				1.2879	0.114732
D5AJE9	Putative uncharacterized protein OS=Streptococcus suis (strain GZ1) GN=SSGZ1_1508 PE=4 SV=1 - [D5AJE9_STRGZ]				1.07377	0.659088
B9WXU6	ABC transporter related protein OS=Streptococcus suis 89/1591 GN=SsuiDRAFT_2259 PE=4 SV=1 - [B9WXU6_STRSU]	nucleotide binding; catalytic activity; transporter activity	membrane	metabolic process; transport	1.87357	8.88383e-05
G7RX99	Permease OS=Streptococcus suis A7 GN=SSUA7_1602 PE=4 SV=1 - [G7RX99_STRSU]	transporter activity	membrane	transport	0.753264	0.0448352
A4W2C0	DNA segregation ATPase FtsK/SpoIIIE and related proteins OS=Streptococcus suis (strain 98HAH33) GN=SSU98_1351 PE=4 SV=1 - [A4W2C0_STRS2]	nucleotide binding; DNA binding; catalytic activity	membrane	cell division	1.03564	0.829582
M3T1P2	DegV family protein OS=Streptococcus suis PE=4 SV=1 - [M3T1P2_STRSU]				1.06099	0.714111
G7S6K7	L-serine dehydratase, beta chain OS=Streptococcus suis SS12 GN=sdhB PE=4 SV=1 - [G7S6K7_STRSU]	catalytic activity		metabolic process	0.911705	0.511045
G7S283	Putative folylpolyglutamate synthetase OS=Streptococcus suis SS12 GN=SSU12_0137 PE=3 SV=1 - [G7S283_STRSU]	nucleotide binding; catalytic activity		metabolic process	0.877903	0.355391
G5L098	Transcriptional regulator Spx OS=Streptococcus suis R61 GN=spxA PE=4 SV=1 - [G5L098_STRSU]	catalytic activity		cellular homeostasis; regulation of biological process	1.51464	0.00958462
G7SNF2	Putative uncharacterized protein OS=Streptococcus suis ST1 GN=SSUST1_0266 PE=4 SV=1 - [G7SNF2_STRSU]				1.17066	0.326621
B9WVB9	Putative uncharacterized protein OS=Streptococcus suis 89/1591 GN=SsuiDRAFT_2959 PE=4 SV=1 - [B9WVB9_STRSU]		membrane		0.895818	0.434545
A4VVB5	Pantothenate kinase OS=Streptococcus suis (strain 05ZYH33) GN=coaA PE=3 SV=1 - [COAA_STRSY]	nucleotide binding; catalytic activity	cytoplasm	metabolic process	1.15317	0.37515
G7S7A2	50S ribosomal protein L7/L12 OS=Streptococcus suis D9 GN=rplL PE=3 SV=1 - [G7S7A2_STRSU]	structural molecule activity	cytoplasm; ribosome	metabolic process	0.885472	0.387849
G7S526	Sortase and related acyltransferase OS=Streptococcus suis SS12 GN=SSU12_0654 PE=4 SV=1 - [G7S526_STRSU]	catalytic activity			1.07879	0.638129
A4VUK1	Phosphotransferase system, fructose-specific IIC component OS=Streptococcus suis (strain 05ZYH33) GN=SSU05_0824 PE=4 SV=1 - [A4VUK1_STRSY]	transporter activity; catalytic activity	membrane	transport	0.899417	0.451391
Q3Y455	Glyceraldehyde-3-phosphate dehydrogenase OS=Streptococcus suis PE=3 SV=1 - [Q3Y455_STRSU]	nucleotide binding; catalytic activity		metabolic process	0.95456	0.73942
A1YSD7	UDP-N-acetylmuramate--alanine ligase (Fragment) OS=Streptococcus suis PE=3 SV=1 - [A1YSD7_STRSU]	nucleotide binding; catalytic activity	cytoplasm	cell organization and biogenesis; regulation of biological process; metabolic process; cell division	0.899314	0.450905
G5KYE6	SAM-dependent methyltransferase OS=Streptococcus suis R61 GN=SSUR61_0673 PE=3 SV=1 - [G5KYE6_STRSU]	catalytic activity	cytoplasm; membrane	metabolic process	1.02753	0.868066
G7S929	ATPase, P-type (Transporting), HAD superfamily, subfamily IC OS=Streptococcus suis D9 GN=SSUD9_0226 PE=3 SV=1 - [G7S929_STRSU]	nucleotide binding; catalytic activity; transporter activity; antioxidant activity; metal ion binding	membrane	transport; metabolic process	0.718238	0.0191465
G5KYH6	UPF0109 protein SSUR61_0703 OS=Streptococcus suis R61 GN=SSUR61_0703 PE=3 SV=1 - [G5KYH6_STRSU]	RNA binding			1.13344	0.435926
M1UQ93	Uncharacterized protein OS=Streptococcus suis SC070731 GN=NJAUSS_1556 PE=4 SV=1 - [M1UQ93_STRSU]				0.855921	0.269864
G7S1S0	Peptidyl-prolyl cis-trans isomerase OS=Streptococcus suis SS12 GN=SSU12_1241 PE=3 SV=1 - [G7S1S0_STRSU]	catalytic activity		metabolic process	1.00755	0.965334
G7S5W8	Peptide chain release factor 1 OS=Streptococcus suis SS12 GN=prfA PE=3 SV=1 - [G7S5W8_STRSU]	RNA binding	cytoplasm	metabolic process; cell organization and biogenesis	0.900578	0.456887
R4NT22	LSU ribosomal protein L33p OS=Streptococcus suis TL13 GN=rpmG PE=4 SV=1 - [R4NT22_STRSU]		cytoplasm; ribosome		0.869235	0.320076
A4W2Q0	Phosphoglucosamine mutase OS=Streptococcus suis (strain 98HAH33) GN=glmM PE=3 SV=2 - [GLMM_STRS2]	metal ion binding; catalytic activity		metabolic process	0.920725	0.556774
G7S6Z3	Putative uncharacterized protein OS=Streptococcus suis SS12 GN=SSU12_1028 PE=4 SV=1 - [G7S6Z3_STRSU]				1.95658	2.78828e-05
G7S1X9	Site-specific recombinase, phage integrase family OS=Streptococcus suis SS12 GN=SSU12_0110 PE=4 SV=1 - [G7S1X9_STRSU]	DNA binding		metabolic process	0.844632	0.231232
G7S8V5	CobB/CobQ domain protein glutamine amidotransferase OS=Streptococcus suis D9 GN=SSUD9_1485 PE=4 SV=1 - [G7S8V5_STRSU]	catalytic activity		metabolic process	1.0219	0.89512
G7S2E8	UDP-glucose 4-epimerase OS=Streptococcus suis SS12 GN=SSU12_1324 PE=3 SV=1 - [G7S2E8_STRSU]	nucleotide binding; catalytic activity		metabolic process	0.871119	0.327579
A4W0W9	Serine hydroxymethyltransferase OS=Streptococcus suis (strain 98HAH33) GN=glyA PE=3 SV=1 - [GLYA_STRS2]	catalytic activity	cytoplasm	metabolic process	0.875643	0.345989
G7S4Y9	Putative uncharacterized protein OS=Streptococcus suis SS12 GN=SSU12_0615 PE=4 SV=1 - [G7S4Y9_STRSU]				0.952533	0.728109
F4EDR8	Cell division protein FtsX OS=Streptococcus suis GN=ftsX PE=3 SV=1 - [F4EDR8_STRSU]		membrane	cell division	0.954069	0.736674
G7S6Q4	Glycogen synthase OS=Streptococcus suis SS12 GN=glgA PE=3 SV=1 - [G7S6Q4_STRSU]	catalytic activity		metabolic process	1.04376	0.79174
A4W2F8	Queuine tRNA-ribosyltransferase OS=Streptococcus suis (strain 98HAH33) GN=tgt PE=3 SV=1 - [TGT_STRS2]	catalytic activity; metal ion binding		metabolic process	1.02357	0.88707
J7KPK7	Uncharacterized protein OS=Streptococcus suis S735 GN=YYK_08145 PE=4 SV=1 - [J7KPK7_STRSU]		membrane		1.04451	0.788298
R4NXM6	Branched-chain amino acid transport ATP-binding protein LivG OS=Streptococcus suis TL13 GN=livG PE=4 SV=1 - [R4NXM6_STRSU]	nucleotide binding			0.835346	0.202199
G7S552	Amino acid ABC transporter, amino acid-binding protein/permease protein OS=Streptococcus suis SS12 GN=SSU12_1816 PE=4 SV=1 - [G7S552_STRSU]	transporter activity	membrane	transport	1.21057	0.233889
G7S1P1	HrpA-like helicase OS=Streptococcus suis SS12 GN=SSU12_1212 PE=4 SV=1 - [G7S1P1_STRSU]	nucleotide binding; catalytic activity		metabolic process	1.2698	0.136524
B9WWZ5	Major facilitator superfamily MFS_1 OS=Streptococcus suis 89/1591 GN=SsuiDRAFT_2340 PE=4 SV=1 - [B9WWZ5_STRSU]		membrane	transport	0.968894	0.820189
A4VVD6	Uncharacterized protein OS=Streptococcus suis (strain 05ZYH33) GN=SSU05_1109 PE=4 SV=1 - [A4VVD6_STRSY]			metabolic process	0.915734	0.531282
G5L3I4	ABC-type multidrug transport system, ATPase component OS=Streptococcus suis R61 GN=SSUR61_0182 PE=4 SV=1 - [G5L3I4_STRSU]	nucleotide binding; catalytic activity		metabolic process	0.890734	0.411273
A4W247	3-dehydroquinate dehydratase OS=Streptococcus suis (strain 98HAH33) GN=aroD PE=3 SV=1 - [AROD_STRS2]	catalytic activity		metabolic process	1.0393	0.812403
G7S3S1	GAF domain-containing protein OS=Streptococcus suis SS12 GN=SSU12_1575 PE=4 SV=1 - [G7S3S1_STRSU]	protein binding			0.938279	0.649693
G7S655	Metalloendopeptidase OS=Streptococcus suis SS12 GN=SSU12_2013 PE=4 SV=1 - [G7S655_STRSU]	catalytic activity		metabolic process	0.968517	0.81805
B9WYD0	ABC transporter ATP-binding protein OS=Streptococcus suis 89/1591 GN=SsuiDRAFT_2027 PE=4 SV=1 - [B9WYD0_STRSU]	nucleotide binding; catalytic activity; transporter activity	membrane	metabolic process; transport	1.28632	0.116511
G7SC36	Putative uncharacterized protein OS=Streptococcus suis D9 GN=SSUD9_2104 PE=4 SV=1 - [G7SC36_STRSU]				1.04453	0.788188
G7S5K2	Dihydroxyacetone kinase OS=Streptococcus suis SS12 GN=SSU12_1891 PE=4 SV=1 - [G7S5K2_STRSU]	catalytic activity		metabolic process	0.785157	0.0866812
G7S430	Putative uncharacterized protein OS=Streptococcus suis SS12 GN=SSU12_0468 PE=4 SV=1 - [G7S430_STRSU]				1.18274	0.295982
A4W2D1	Peptide chain release factor 3 OS=Streptococcus suis (strain 98HAH33) GN=prfC PE=3 SV=1 - [RF3_STRS2]	nucleotide binding; catalytic activity; RNA binding	cytoplasm	metabolic process; cell organization and biogenesis; regulation of biological process; response to stimulus	0.873598	0.337598
A4VWC5	Phosphopentomutase OS=Streptococcus suis (strain 05ZYH33) GN=deoB PE=3 SV=1 - [DEOB_STRSY]	metal ion binding; catalytic activity	cytoplasm	metabolic process	0.969626	0.824342
G7S507	Putative uncharacterized protein OS=Streptococcus suis SS12 GN=SSU12_0633 PE=4 SV=1 - [G7S507_STRSU]				1.14198	0.408811
A4W4J9	Arginine--tRNA ligase OS=Streptococcus suis (strain 98HAH33) GN=argS PE=3 SV=1 - [SYR_STRS2]	nucleotide binding; catalytic activity	cytoplasm	metabolic process	0.950809	0.718513
G7S186	Transcriptional regulator OS=Streptococcus suis SS12 GN=SSU12_1100 PE=4 SV=1 - [G7S186_STRSU]			metabolic process; regulation of biological process	0.957039	0.753296
R4NYE2	Putative amino acid ABC transporter (ATP-binding protein) OS=Streptococcus suis TL13 GN=glnQ PE=4 SV=1 - [R4NYE2_STRSU]	nucleotide binding			1.02093	0.89982
G7S5A4	Transcriptional regulator OS=Streptococcus suis SS12 GN=SSU12_1870 PE=4 SV=1 - [G7S5A4_STRSU]			metabolic process; regulation of biological process	0.908109	0.493257
G7S406	TIM-barrel fold family protein OS=Streptococcus suis SS12 GN=SSU12_0444 PE=3 SV=1 - [G7S406_STRSU]				0.947443	0.699861
B9WV23	Putative uncharacterized protein OS=Streptococcus suis 89/1591 GN=SsuiDRAFT_3247 PE=4 SV=1 - [B9WV23_STRSU]		membrane		1.13048	0.445633
G7S6H4	ABC transporter substrate-binding protein-maltose/maltodextrin OS=Streptococcus suis SS12 GN=SSU12_2052 PE=4 SV=1 - [G7S6H4_STRSU]	transporter activity		transport	0.897764	0.443619
G7S1L2	Lipopolysaccharide biosynthesis protein, LPS:glycosyltransferases OS=Streptococcus suis SS12 GN=SSU12_1181 PE=4 SV=1 - [G7S1L2_STRSU]	catalytic activity			0.943737	0.679458
F4ED23	Peptide ABC transporter, permease protein OS=Streptococcus suis GN=SSUST3_1713 PE=3 SV=1 - [F4ED23_STRSU]	transporter activity	membrane	transport	0.781207	0.0803244
B9WVL8	Polysaccharide biosynthesis protein OS=Streptococcus suis 89/1591 GN=SsuiDRAFT_3014 PE=4 SV=1 - [B9WVL8_STRSU]		membrane	metabolic process	1.03997	0.809298
G7S6Y9	tRNA pseudouridine synthase B OS=Streptococcus suis SS12 GN=truB PE=3 SV=1 - [G7S6Y9_STRSU]	RNA binding; catalytic activity		metabolic process	1.14766	0.391466
B9WVC8	CMP/dCMP deaminase zinc-binding OS=Streptococcus suis 89/1591 GN=SsuiDRAFT_2968 PE=3 SV=1 - [B9WVC8_STRSU]	catalytic activity; metal ion binding		metabolic process	1.08338	0.619307
A4VWL7	DNA polymerase III delta subunit OS=Streptococcus suis (strain 05ZYH33) GN=SSU05_1540 PE=4 SV=1 - [A4VWL7_STRSY]	DNA binding; catalytic activity		metabolic process	0.993939	0.962545
A4W1W1	ATP synthase subunit b OS=Streptococcus suis (strain 98HAH33) GN=atpF PE=3 SV=1 - [ATPF_STRS2]	transporter activity; catalytic activity	membrane	metabolic process; transport	0.899767	0.453044
A1YSE2	RNA polymerase sigma factor (Fragment) OS=Streptococcus suis PE=3 SV=1 - [A1YSE2_STRSU]	DNA binding		metabolic process; regulation of biological process	0.914545	0.525275
G5L075	Putative uncharacterized protein OS=Streptococcus suis R61 GN=SSUR61_1403 PE=4 SV=1 - [G5L075_STRSU]				0.790211	0.0953497
E8UKC3	Uncharacterized protein OS=Streptococcus suis (strain JS14) GN=SSUJS14_0372 PE=4 SV=1 - [E8UKC3_STREJ]				1.50784	0.0103964
R4NKY0	Uncharacterized protein OS=Streptococcus suis TL13 GN=TL13_0756 PE=4 SV=1 - [R4NKY0_STRSU]				1.02918	0.86017
G7S3F1	Putative uncharacterized protein OS=Streptococcus suis SS12 GN=SSU12_1523 PE=4 SV=1 - [G7S3F1_STRSU]				1.00871	0.959595
G5KZ91	GTPase HflX OS=Streptococcus suis R61 GN=hflX PE=3 SV=1 - [G5KZ91_STRSU]	nucleotide binding; catalytic activity	cytoplasm	metabolic process	1.34727	0.0630492
G7S3C2	Putative uncharacterized protein OS=Streptococcus suis SS12 GN=SSU12_1494 PE=4 SV=1 - [G7S3C2_STRSU]			transport	0.895747	0.43422
A4W410	30S ribosomal protein S15 OS=Streptococcus suis (strain 98HAH33) GN=rpsO PE=3 SV=2 - [RS15_STRS2]	RNA binding; structural molecule activity	cytoplasm; ribosome	metabolic process	1.0788	0.638087
A4W487	Argininosuccinate lyase OS=Streptococcus suis (strain 98HAH33) GN=argH PE=3 SV=1 - [ARLY_STRS2]	catalytic activity	cytoplasm	metabolic process	0.757646	0.0493905
B9WY00	ABC transporter related protein OS=Streptococcus suis 89/1591 GN=SsuiDRAFT_2202 PE=3 SV=1 - [B9WY00_STRSU]	nucleotide binding; catalytic activity		metabolic process	0.782437	0.0822649
M1VP19	Uncharacterized protein OS=Streptococcus suis PE=4 SV=1 - [M1VP19_STRSU]				1.08099	0.629055
G7S4D5	Putative uncharacterized protein OS=Streptococcus suis SS12 GN=SSU12_1710 PE=4 SV=1 - [G7S4D5_STRSU]	nucleotide binding; RNA binding; catalytic activity			1.06481	0.697434
G7S3J9	Putative uncharacterized protein OS=Streptococcus suis SS12 GN=SSU12_0367 PE=4 SV=1 - [G7S3J9_STRSU]				1.00057	1
G5KXI4	Thiol-disulfide isomerase and thioredoxin OS=Streptococcus suis R61 GN=SSUR61_0396 PE=4 SV=1 - [G5KXI4_STRSU]	catalytic activity	membrane	metabolic process; cellular homeostasis; regulation of biological process	0.783558	0.0840642
D5AF23	NUDIX hydrolase OS=Streptococcus suis (strain GZ1) GN=SSGZ1_1960 PE=3 SV=1 - [D5AF23_STRGZ]	catalytic activity			1.23269	0.192391
G7S2N0	Putative uncharacterized protein OS=Streptococcus suis SS12 GN=SSU12_0203 PE=4 SV=1 - [G7S2N0_STRSU]				1.15456	0.371092
B9WY67	ABC transporter EcsB (Fragment) OS=Streptococcus suis 89/1591 GN=SsuiDRAFT_2107 PE=4 SV=1 - [B9WY67_STRSU]		membrane		0.762775	0.0551704
G7S1B2	Gluconate 5-dehydrogenase OS=Streptococcus suis SS12 GN=idnO PE=3 SV=1 - [G7S1B2_STRSU]	nucleotide binding; catalytic activity		metabolic process	0.980282	0.884927
G7S1N6	Single-stranded DNA-specific exonuclease OS=Streptococcus suis SS12 GN=SSU12_1207 PE=4 SV=1 - [G7S1N6_STRSU]	catalytic activity; metal ion binding		metabolic process; response to stimulus	1.06558	0.694073
J7KSM2	Membrane protease subunit OS=Streptococcus suis S735 GN=YYK_08055 PE=4 SV=1 - [J7KSM2_STRSU]	catalytic activity	membrane	metabolic process	0.868534	0.317311
A4VUJ6	Ribosome maturation factor RimM OS=Streptococcus suis (strain 05ZYH33) GN=rimM PE=3 SV=1 - [RIMM_STRSY]		cytoplasm; ribosome	metabolic process	0.976079	0.861006
G7S571	Putative uncharacterized protein OS=Streptococcus suis SS12 GN=SSU12_1835 PE=4 SV=1 - [G7S571_STRSU]				0.856286	0.271175
G7S5Z2	Putative uncharacterized protein OS=Streptococcus suis SS12 GN=SSU12_0814 PE=4 SV=1 - [G7S5Z2_STRSU]				1.01529	0.927282
M1TLL9	tRNA-dihydrouridine synthase OS=Streptococcus suis SC070731 GN=NJAUSS_1815 PE=3 SV=1 - [M1TLL9_STRSU]	catalytic activity; nucleotide binding		metabolic process	1.1006	0.551609
A4W3N5	Alanine racemase OS=Streptococcus suis (strain 98HAH33) GN=alr PE=3 SV=1 - [ALR_STRS2]	catalytic activity		metabolic process	0.839975	0.216359
G7S5V6	Dihydrofolate reductase OS=Streptococcus suis SS12 GN=SSU12_0778 PE=3 SV=1 - [G7S5V6_STRSU]	catalytic activity; nucleotide binding		metabolic process	0.891262	0.413664
G7SHW7	Putative uncharacterized protein OS=Streptococcus suis D12 GN=SSUD12_1159 PE=4 SV=1 - [G7SHW7_STRSU]		membrane		2.00156	1.47696e-05
F8V3W8	Cps2J OS=Streptococcus suis GN=cps2J PE=4 SV=1 - [F8V3W8_STRSU]		membrane		0.791983	0.0985358
G7S6U5	Putative uncharacterized protein OS=Streptococcus suis SS12 GN=SSU12_0980 PE=4 SV=1 - [G7S6U5_STRSU]			metabolic process	1.04925	0.766605
B9WU04	Glycosyl transferase group 1 OS=Streptococcus suis 89/1591 GN=SsuiDRAFT_3196 PE=4 SV=1 - [B9WU04_STRSU]	catalytic activity		metabolic process	0.875039	0.343497
G7S8P5	Phosphoglycerate kinase OS=Streptococcus suis D9 GN=pgk PE=3 SV=1 - [G7S8P5_STRSU]	nucleotide binding; catalytic activity	cytoplasm	metabolic process	11.3491	5.28579e-52
G7S2V4	UPF0237 protein SSU12_0279 OS=Streptococcus suis SS12 GN=SSU12_0279 PE=3 SV=1 - [G7S2V4_STRSU]			metabolic process	0.917729	0.541417
G7S3C1	Branched chain amino acid ABC transporter permease OS=Streptococcus suis SS12 GN=SSU12_1493 PE=4 SV=1 - [G7S3C1_STRSU]	transporter activity	membrane	transport	1.2306	0.196042
G7S4Q4	Aspartokinase OS=Streptococcus suis SS12 GN=SSU12_1748 PE=3 SV=1 - [G7S4Q4_STRSU]	catalytic activity		metabolic process	0.885994	0.390142
M1V3J4	UPF0246 protein OS=Streptococcus suis PE=3 SV=1 - [M1V3J4_STRSU]				1.02634	0.873761
G7S696	Alpha/beta superfamily hydrolase OS=Streptococcus suis SS12 GN=SSU12_0840 PE=4 SV=1 - [G7S696_STRSU]	catalytic activity			1.40573	0.0336495
G7S3C6	Glycosidase OS=Streptococcus suis SS12 GN=SSU12_1498 PE=4 SV=1 - [G7S3C6_STRSU]	catalytic activity		metabolic process	0.920251	0.554332
A4W401	Polyribonucleotide nucleotidyltransferase OS=Streptococcus suis (strain 98HAH33) GN=pnp PE=3 SV=2 - [PNP_STRS2]	catalytic activity; RNA binding	cytoplasm	metabolic process	1.02273	0.891111
G7S2L6	Phosphatase OS=Streptococcus suis SS12 GN=SSU12_1392 PE=4 SV=1 - [G7S2L6_STRSU]	catalytic activity		metabolic process	0.972496	0.840636
F4EEQ8	Prephenate dehydratase OS=Streptococcus suis GN=SSUST3_0759 PE=4 SV=1 - [F4EEQ8_STRSU]	catalytic activity		metabolic process	0.83065	0.18846
A4VVD2	ABC-type phosphate transport system, periplasmic component OS=Streptococcus suis (strain 05ZYH33) GN=SSU05_1105 PE=4 SV=1 - [A4VVD2_STRSY]				0.944839	0.68551
G7S543	ABC-type transport system involved in Fe-S cluster assembly, permease component OS=Streptococcus suis SS12 GN=SSU12_1807 PE=4 SV=1 - [G7S543_STRSU]			cell organization and biogenesis; metabolic process	0.879179	0.360757
Q9X4U7	Cps2C OS=Streptococcus suis GN=cps2C PE=4 SV=1 - [Q9X4U7_STRSU]	catalytic activity; enzyme regulator activity		metabolic process; cell organization and biogenesis; regulation of biological process	0.853052	0.259699
G7S436	ABC transporter OS=Streptococcus suis SS12 GN=SSU12_0474 PE=3 SV=1 - [G7S436_STRSU]	nucleotide binding; catalytic activity		metabolic process	1.00979	0.95426
B9WU91	Putative uncharacterized protein OS=Streptococcus suis 89/1591 GN=SsuiDRAFT_3414 PE=4 SV=1 - [B9WU91_STRSU]	catalytic activity		metabolic process	1.20026	0.255549
G7S3G7	Peptide ABC transporter ATPase OS=Streptococcus suis SS12 GN=SSU12_1539 PE=3 SV=1 - [G7S3G7_STRSU]	nucleotide binding; catalytic activity		metabolic process	0.871591	0.329472
A4W351	S-adenosylmethionine synthase OS=Streptococcus suis (strain 98HAH33) GN=metK PE=3 SV=1 - [METK_STRS2]	nucleotide binding; metal ion binding; catalytic activity	cytoplasm	metabolic process	1.01792	0.914428
G7S418	Putative amino acid ABC transporter, ATP-binding protein OS=Streptococcus suis SS12 GN=SSU12_0456 PE=3 SV=1 - [G7S418_STRSU]	nucleotide binding; DNA binding; catalytic activity	membrane	metabolic process; cell division	0.708805	0.014847
G7S4X2	Putative uncharacterized protein OS=Streptococcus suis SS12 GN=SSU12_0598 PE=4 SV=1 - [G7S4X2_STRSU]				1.19307	0.271591
G5L0N1	Putative metal-dependent transcriptional regulator OS=Streptococcus suis R61 GN=SSUR61_1660 PE=4 SV=1 - [G5L0N1_STRSU]	DNA binding; metal ion binding; protein binding		metabolic process; regulation of biological process	0.908188	0.493644
G7RZ15	Bifunctional 2',3'-cyclic nucleotide 2'-phosphodiesterase/3'-nucleotidase protein OS=Streptococcus suis A7 GN=cpdB PE=3 SV=1 - [G7RZ15_STRSU]	nucleotide binding; catalytic activity; metal ion binding		metabolic process	0.712665	0.016498
G7S2B8	Putative uncharacterized protein OS=Streptococcus suis SS12 GN=SSU12_0172 PE=3 SV=1 - [G7S2B8_STRSU]		membrane		0.86763	0.313761
A4VUL4	ATP-dependent Clp protease ATP-binding subunit ClpX OS=Streptococcus suis (strain 05ZYH33) GN=clpX PE=3 SV=1 - [A4VUL4_STRSY]	nucleotide binding; catalytic activity; metal ion binding; protein binding		metabolic process; response to stimulus	1.00146	0.995544
B9WUK8	Putative uncharacterized protein OS=Streptococcus suis 89/1591 GN=SsuiDRAFT_4101 PE=4 SV=1 - [B9WUK8_STRSU]				0.976527	0.863554
E8UMB3	Transcription-repair coupling factor OS=Streptococcus suis (strain JS14) GN=SSUJS14_0008 PE=4 SV=1 - [E8UMB3_STREJ]	nucleotide binding; DNA binding; catalytic activity	membrane	metabolic process; response to stimulus	1.00796	0.963316
A4W1S2	Putative cation efflux transporter OS=Streptococcus suis (strain 98HAH33) GN=SSU98_1153 PE=4 SV=1 - [A4W1S2_STRS2]				1.24876	0.166222
A4W0S7	Spermidine/putrescine-binding periplasmic protein OS=Streptococcus suis (strain 98HAH33) GN=SSU98_0808 PE=4 SV=1 - [A4W0S7_STRS2]	transporter activity		transport	0.711775	0.0161047
D2KKL0	Glutamate dehydrogenase OS=Streptococcus suis GN=gdh PE=3 SV=1 - [D2KKL0_STRSU]	nucleotide binding; catalytic activity		metabolic process	1.02933	0.859425
J7KGM2	DNA-binding protein OS=Streptococcus suis S735 GN=YYK_00800 PE=4 SV=1 - [J7KGM2_STRSU]	DNA binding			0.881395	0.370181
F4EC30	Putative uncharacterized protein OS=Streptococcus suis GN=SSUST3_0293 PE=4 SV=1 - [F4EC30_STRSU]				1.05319	0.748791
R4NV64	Cysteinyl-tRNA synthetase related protein OS=Streptococcus suis TL13 GN=TL13_0477 PE=4 SV=1 - [R4NV64_STRSU]	catalytic activity			0.930432	0.607581
R4NUN9	SSU ribosomal protein S16p OS=Streptococcus suis TL13 GN=rpsP PE=4 SV=1 - [R4NUN9_STRSU]		cytoplasm; ribosome		1.24598	0.170519
G5L1Q1	Putative uncharacterized protein OS=Streptococcus suis R61 GN=SSUR61_1523 PE=4 SV=1 - [G5L1Q1_STRSU]		membrane		1.08915	0.596101
A4VST7	Endonuclease III OS=Streptococcus suis (strain 05ZYH33) GN=SSU05_0208 PE=3 SV=1 - [A4VST7_STRSY]	DNA binding; catalytic activity		metabolic process; response to stimulus	1.26887	0.137739
A4VZL7	Ribosomal RNA small subunit methyltransferase G OS=Streptococcus suis (strain 98HAH33) GN=rsmG PE=3 SV=1 - [RSMG_STRS2]	catalytic activity	cytoplasm	metabolic process	0.817576	0.153506
A4VSR3	Predicted flavoprotein OS=Streptococcus suis (strain 05ZYH33) GN=SSU05_0183 PE=4 SV=1 - [A4VSR3_STRSY]	catalytic activity; nucleotide binding		metabolic process	1.00484	0.978763
A4W366	Predicted xylanase/chitin deacetylase OS=Streptococcus suis (strain 98HAH33) GN=SSU98_1647 PE=4 SV=1 - [A4W366_STRS2]	catalytic activity		metabolic process	1.09247	0.582982
G5L3A2	Aspartate--ammonia ligase OS=Streptococcus suis R61 GN=asnA PE=3 SV=1 - [G5L3A2_STRSU]	nucleotide binding; catalytic activity	cytoplasm; membrane	metabolic process	0.915945	0.532348
A4W1Q9	Peptidase T OS=Streptococcus suis (strain 98HAH33) GN=pepT PE=3 SV=1 - [PEPT_STRS2]	catalytic activity; metal ion binding	cytoplasm	metabolic process	0.843196	0.226578
G7S3D2	AraC-type DNA-binding domain-containing protein OS=Streptococcus suis SS12 GN=SSU12_1504 PE=4 SV=1 - [G7S3D2_STRSU]	DNA binding		metabolic process; regulation of biological process	0.853971	0.262931
G7RZ33	5'-nucleotidase/2',3'-cyclic phosphodiesterase-like esterase OS=Streptococcus suis A7 GN=SSUA7_1929 PE=3 SV=1 - [G7RZ33_STRSU]	nucleotide binding; catalytic activity; metal ion binding	membrane	metabolic process	0.99811	0.986143
G7S1D5	Phospho-2-dehydro-3-deoxyheptonate aldolase OS=Streptococcus suis SS12 GN=SSU12_1151 PE=3 SV=1 - [G7S1D5_STRSU]	catalytic activity		metabolic process	0.803305	0.120735
A4W0A3	Glucosamine-6-phosphate deaminase OS=Streptococcus suis (strain 98HAH33) GN=nagB PE=3 SV=1 - [NAGB_STRS2]	catalytic activity		metabolic process	1.27704	0.127416
A4W4Q9	Trypsin-like serine protease, typically periplasmic, contain C-terminal PDZ domain OS=Streptococcus suis (strain 98HAH33) GN=SSU98_2190 PE=4 SV=1 - [A4W4Q9_STRS2]	catalytic activity; protein binding		metabolic process; regulation of biological process; cell communication; response to stimulus	0.962251	0.782614
G7S426	Putative mercuric resisitant regulatory protein OS=Streptococcus suis SS12 GN=SSU12_0464 PE=4 SV=1 - [G7S426_STRSU]	nucleotide binding; DNA binding		metabolic process; regulation of biological process	1.15709	0.36382
G7S434	Glutathione reductase OS=Streptococcus suis SS12 GN=SSU12_0472 PE=3 SV=1 - [G7S434_STRSU]	antioxidant activity; catalytic activity; nucleotide binding	cytoplasm	metabolic process; cellular homeostasis; regulation of biological process	1.16041	0.35446
A4VYR5	Translation initiation factor IF-1 OS=Streptococcus suis (strain 98HAH33) GN=infA PE=3 SV=1 - [IF1_STRS2]	RNA binding	cytoplasm	metabolic process	1.10844	0.522373
B0FYB9	Peptide ABC transporter peptide-binding protein (Fragment) OS=Streptococcus suis PE=4 SV=1 - [B0FYB9_STRSU]	transporter activity		transport	1.22027	0.214877
M1UFI1	D-alanine--poly(Phosphoribitol) ligase subunit 1 OS=Streptococcus suis SC070731 GN=NJAUSS_0700 PE=3 SV=1 - [M1UFI1_STRSU]	nucleotide binding; catalytic activity	cytoplasm	metabolic process	0.907041	0.488023
G7S3A6	Putative ATP-binding protein OS=Streptococcus suis SS12 GN=SSU12_0354 PE=4 SV=1 - [G7S3A6_STRSU]	nucleotide binding			1.01465	0.930426
G5L2A8	ATPase involved in cell division OS=Streptococcus suis R61 GN=SSUR61_2081 PE=3 SV=1 - [G5L2A8_STRSU]	nucleotide binding; catalytic activity		metabolic process; cell division	0.907624	0.490879
G5KXE6	ABC transporter related protein OS=Streptococcus suis R61 GN=SSUR61_0364 PE=4 SV=1 - [G5KXE6_STRSU]	nucleotide binding; catalytic activity; transporter activity	membrane	metabolic process; transport	1.03812	0.817939
G7S461	ABC-type multidrug transport system, ATPase component OS=Streptococcus suis SS12 GN=SSU12_0499 PE=4 SV=1 - [G7S461_STRSU]	nucleotide binding; catalytic activity		metabolic process	1.01693	0.919279
G7S6W3	Basic membrane lipoprotein OS=Streptococcus suis SS12 GN=SSU12_0998 PE=4 SV=1 - [G7S6W3_STRSU]		membrane		0.902403	0.465585
R4NMB3	50S ribosomal protein L9 OS=Streptococcus suis TL13 GN=rplL PE=3 SV=1 - [R4NMB3_STRSU]		cytoplasm; ribosome		0.894066	0.426457
B9WXS9	Serine--tRNA ligase OS=Streptococcus suis 89/1591 GN=serS PE=3 SV=1 - [B9WXS9_STRSU]	nucleotide binding; catalytic activity	cytoplasm	metabolic process	0.918285	0.544252
B9WUU4	Exopolysaccharide biosynthesis polyprenyl glycosylphosphotransferase OS=Streptococcus suis 89/1591 GN=SsuiDRAFT_3362 PE=4 SV=1 - [B9WUU4_STRSU]	catalytic activity			0.988687	0.932741
G7SD91	Glutamine synthetase OS=Streptococcus suis D12 GN=SSUD12_0155 PE=3 SV=1 - [G7SD91_STRSU]	catalytic activity	cytoplasm	metabolic process	0.909988	0.502521
G7RZ29	Uncharacterized protein OS=Streptococcus suis A7 GN=SSUA7_1925 PE=4 SV=1 - [G7RZ29_STRSU]				0.815111	0.14745
A4W0S3	UDP-N-acetylenolpyruvoylglucosamine reductase OS=Streptococcus suis (strain 98HAH33) GN=murB PE=3 SV=1 - [MURB_STRS2]	catalytic activity; nucleotide binding	cytoplasm	cell organization and biogenesis; regulation of biological process; metabolic process; cell division	1.04582	0.782235
M1UGE2	Uncharacterized protein OS=Streptococcus suis SC070731 GN=NJAUSS_1064 PE=4 SV=1 - [M1UGE2_STRSU]				0.647168	0.00207734
A4W4A9	Glycerol-3-phosphate dehydrogenase [NAD(P)+] OS=Streptococcus suis (strain 98HAH33) GN=gpsA PE=3 SV=1 - [GPDA_STRS2]	nucleotide binding; catalytic activity	cytoplasm	metabolic process	0.882456	0.374741
G7S4M3	Arginine deiminase OS=Streptococcus suis SS12 GN=arcA PE=3 SV=1 - [G7S4M3_STRSU]	catalytic activity	cytoplasm	metabolic process	0.835198	0.201756
A4W1K6	L-lactate dehydrogenase OS=Streptococcus suis (strain 98HAH33) GN=ldh PE=3 SV=1 - [LDH_STRS2]	nucleotide binding; catalytic activity	cytoplasm	metabolic process	0.872153	0.331738
A4W0T9	tRNA (guanine-N(1)-)-methyltransferase OS=Streptococcus suis (strain 98HAH33) GN=trmD PE=3 SV=1 - [TRMD_STRS2]	RNA binding; catalytic activity	cytoplasm	metabolic process	1.1354	0.429607
C6GWV6	Threonine dehydratase biosynthetic OS=Streptococcus suis (strain BM407) GN=ilvA PE=4 SV=1 - [C6GWV6_STRS4]	catalytic activity	membrane	metabolic process	0.858361	0.278695
G7S3W9	Putative secreted protein containing a PDZ domain protein OS=Streptococcus suis SS12 GN=SSU12_1625 PE=4 SV=1 - [G7S3W9_STRSU]	catalytic activity		metabolic process	1.0408	0.805422
A4VW30	Recombination protein RecR OS=Streptococcus suis (strain 05ZYH33) GN=recR PE=3 SV=1 - [RECR_STRSY]	DNA binding; metal ion binding		metabolic process; response to stimulus	0.862998	0.295937
G7S3P1	Transcriptional regulator OS=Streptococcus suis SS12 GN=SSU12_0410 PE=4 SV=1 - [G7S3P1_STRSU]	DNA binding		metabolic process; regulation of biological process	1.05218	0.753327
A4VZU7	Cell division protein SepF OS=Streptococcus suis (strain 98HAH33) GN=sepF PE=3 SV=2 - [SEPF_STRS2]		cytoplasm	cell division; cell organization and biogenesis	1.08932	0.5954
G7S6K2	MutT/NudX family protein (Putative) OS=Streptococcus suis SS12 GN=SSU12_2080 PE=4 SV=1 - [G7S6K2_STRSU]	catalytic activity			1.2496	0.16493
G5L178	Putative haloacid dehalogenase-like hydrolase OS=Streptococcus suis R61 GN=SSUR61_1859 PE=4 SV=1 - [G5L178_STRSU]	catalytic activity		metabolic process	0.888763	0.402419
G7S455	HD superfamily phosphohydrolase OS=Streptococcus suis SS12 GN=SSU12_0493 PE=4 SV=1 - [G7S455_STRSU]	catalytic activity; metal ion binding		metabolic process	1.05982	0.719253
A4W2Z7	FMN-dependent NADH-azoreductase OS=Streptococcus suis (strain 98HAH33) GN=azoR PE=3 SV=1 - [AZOR_STRS2]	catalytic activity; nucleotide binding		metabolic process	1.5275	0.00821048
G7SHS2	Pyruvate/2-oxoglutarate dehydrogenase complex, dehydrogenase (E1) component, beta subunit OS=Streptococcus suis D12 GN=SSUD12_1814 PE=4 SV=1 - [G7SHS2_STRSU]	catalytic activity	membrane	metabolic process	0.995461	0.971167
A4VZ92	Histidine--tRNA ligase OS=Streptococcus suis (strain 98HAH33) GN=hisS PE=3 SV=1 - [SYH_STRS2]	nucleotide binding; catalytic activity	cytoplasm	metabolic process	0.91029	0.504014
A4W2F0	Threonine--tRNA ligase OS=Streptococcus suis (strain 98HAH33) GN=thrS PE=3 SV=1 - [SYT_STRS2]	nucleotide binding; catalytic activity; metal ion binding	cytoplasm	metabolic process	0.937001	0.642778
G7SC61	Carbamate kinase OS=Streptococcus suis D9 GN=SSUD9_0791 PE=3 SV=1 - [G7SC61_STRSU]	catalytic activity		metabolic process	0.90154	0.46146
G7S279	Adenine-specific DNA methylase OS=Streptococcus suis SS12 GN=SSU12_0133 PE=4 SV=1 - [G7S279_STRSU]	DNA binding; catalytic activity		metabolic process; regulation of biological process	0.907672	0.491112
A4VYR4	Adenylate kinase OS=Streptococcus suis (strain 98HAH33) GN=adk PE=3 SV=1 - [KAD_STRS2]	nucleotide binding; catalytic activity	cytoplasm	metabolic process	1.12598	0.460631
G5L267	HAD superfamily hydrolase-like protein OS=Streptococcus suis R61 GN=SSUR61_2273 PE=4 SV=1 - [G5L267_STRSU]	catalytic activity		metabolic process	0.977919	0.871475
A4VVQ9	Transcriptional regulator, Cro/CI family OS=Streptococcus suis (strain 05ZYH33) GN=SSU05_1232 PE=4 SV=1 - [A4VVQ9_STRSY]	DNA binding			1.3182	0.0849642
A4W0Y9	Uncharacterized protein OS=Streptococcus suis (strain 98HAH33) GN=SSU98_0870 PE=4 SV=1 - [A4W0Y9_STRS2]		membrane		0.985074	0.912199
G7S578	Multiple sugar-binding transport ATP-binding protein OS=Streptococcus suis SS12 GN=msmK PE=3 SV=1 - [G7S578_STRSU]	nucleotide binding; transporter activity; catalytic activity	membrane	metabolic process; transport	0.88433	0.382859
A4W2H9	GTPase Era OS=Streptococcus suis (strain 98HAH33) GN=era PE=3 SV=1 - [ERA_STRS2]	nucleotide binding; RNA binding; catalytic activity; transporter activity	cytoplasm; membrane	metabolic process; cell communication; regulation of biological process; response to stimulus; transport	0.935338	0.633812
M1UB07	Metallo-beta-lactamase superfamily hydrolase OS=Streptococcus suis SC070731 GN=NJAUSS_1373 PE=4 SV=1 - [M1UB07_STRSU]	RNA binding; catalytic activity; metal ion binding			0.963433	0.789281
G7S3B4	Superoxide dismutase OS=Streptococcus suis SS12 GN=SSU12_1486 PE=3 SV=1 - [G7S3B4_STRSU]	antioxidant activity; catalytic activity; metal ion binding		metabolic process	0.894575	0.428802
A4VVG5	Putative cation efflux transporter OS=Streptococcus suis (strain 05ZYH33) GN=SSU05_1138 PE=4 SV=1 - [A4VVG5_STRSY]	transporter activity	membrane	transport	1.25717	0.15376
A4VZZ4	Triosephosphate isomerase OS=Streptococcus suis (strain 98HAH33) GN=tpiA PE=3 SV=1 - [TPIS_STRS2]	catalytic activity	cytoplasm	metabolic process	0.937724	0.646687
G7SB17	Putative uncharacterized protein OS=Streptococcus suis D9 GN=SSUD9_1888 PE=4 SV=1 - [G7SB17_STRSU]				0.950783	0.718369
A4VYR8	DNA-directed RNA polymerase subunit alpha OS=Streptococcus suis (strain 98HAH33) GN=rpoA PE=3 SV=1 - [RPOA_STRS2]	DNA binding; catalytic activity; protein binding		metabolic process	0.988592	0.932201
G7S3X3	Rhodanese-related sulfurtransferase OS=Streptococcus suis SS12 GN=SSU12_1629 PE=4 SV=1 - [G7S3X3_STRSU]	catalytic activity			0.974512	0.852095
G7RXX5	Uncharacterized protein OS=Streptococcus suis A7 GN=SSUA7_0467 PE=4 SV=1 - [G7RXX5_STRSU]				1.19409	0.26926
G7S179	Acetyltransferase OS=Streptococcus suis SS12 GN=SSU12_1093 PE=4 SV=1 - [G7S179_STRSU]	catalytic activity			1.07355	0.660016
G7S2D5	Phosphosugar isomerase OS=Streptococcus suis SS12 GN=SSU12_0189 PE=4 SV=1 - [G7S2D5_STRSU]	catalytic activity		metabolic process	0.901627	0.461878
G5KZ55	3-phosphoshikimate 1-carboxyvinyltransferase OS=Streptococcus suis R61 GN=aroA PE=3 SV=1 - [G5KZ55_STRSU]	catalytic activity	cytoplasm; membrane	metabolic process	1.07994	0.633403
R4NLF4	Magnesium and cobalt transport protein CorA OS=Streptococcus suis TL13 GN=corA PE=4 SV=1 - [R4NLF4_STRSU]				1.11178	0.510195
G7S4A3	6-phosphogluconate dehydrogenase, decarboxylating OS=Streptococcus suis SS12 GN=SSU12_1678 PE=3 SV=1 - [G7S4A3_STRSU]	nucleotide binding; catalytic activity		metabolic process	0.929251	0.601318
A4VZB5	Chaperone protein DnaK OS=Streptococcus suis (strain 98HAH33) GN=dnaK PE=3 SV=1 - [DNAK_STRS2]	nucleotide binding; protein binding		cell organization and biogenesis; metabolic process; response to stimulus	0.822495	0.166092
G7S725	Phenylalanine--tRNA ligase beta subunit OS=Streptococcus suis SS12 GN=pheT PE=3 SV=1 - [G7S725_STRSU]	RNA binding; nucleotide binding; metal ion binding; catalytic activity	cytoplasm	metabolic process	0.917246	0.538954
G7S1X7	Putative uncharacterized protein OS=Streptococcus suis SS12 GN=SSU12_0108 PE=4 SV=1 - [G7S1X7_STRSU]				0.927962	0.594508
G5L2R2	Cell division protein FtsZ OS=Streptococcus suis R61 GN=ftsZ PE=3 SV=1 - [G5L2R2_STRSU]	nucleotide binding; catalytic activity	cytoplasm; membrane	cell division; cell organization and biogenesis; metabolic process; reproduction	0.855734	0.269195
M1UMP4	Uncharacterized protein OS=Streptococcus suis SC070731 GN=NJAUSS_0498 PE=4 SV=1 - [M1UMP4_STRSU]				1.38535	0.0420505
G7RY37	Cysteine--tRNA ligase OS=Streptococcus suis A7 GN=cysS PE=3 SV=1 - [G7RY37_STRSU]	nucleotide binding; catalytic activity; metal ion binding	cytoplasm	metabolic process	1.07445	0.656239
M1THC8	Capsule biosynthesis protein CapA OS=Streptococcus suis SC070731 GN=NJAUSS_0247 PE=4 SV=1 - [M1THC8_STRSU]				0.841242	0.220343
B9WW58	Asparaginase/glutaminase OS=Streptococcus suis 89/1591 GN=SsuiDRAFT_2985 PE=4 SV=1 - [B9WW58_STRSU]		membrane	metabolic process	1.14029	0.414091
A4W4N7	tRNA-specific 2-thiouridylase MnmA OS=Streptococcus suis (strain 98HAH33) GN=mnmA PE=3 SV=2 - [MNMA_STRS2]	RNA binding; nucleotide binding; catalytic activity	cytoplasm	metabolic process	0.949915	0.713548
G5L0C6	Protein translocase subunit SecY OS=Streptococcus suis R61 GN=secY PE=3 SV=1 - [G5L0C6_STRSU]	transporter activity	membrane	transport	1.06427	0.69978
G7RX57	Permease OS=Streptococcus suis A7 GN=SSUA7_1560 PE=4 SV=1 - [G7RX57_STRSU]				1.03533	0.831039
G7S393	HAD superfamily hydrolase OS=Streptococcus suis SS12 GN=SSU12_0341 PE=4 SV=1 - [G7S393_STRSU]	catalytic activity; antioxidant activity		metabolic process	1.01002	0.953126
M1UTK8	Putative membrane protein yobI OS=Streptococcus suis SC070731 GN=NJAUSS_0356 PE=4 SV=1 - [M1UTK8_STRSU]				1.07463	0.655462
B9WXV4	Aminoglycoside phosphotransferase OS=Streptococcus suis 89/1591 GN=SsuiDRAFT_2108 PE=4 SV=1 - [B9WXV4_STRSU]	catalytic activity			1.03015	0.85553
G7S370	CTP synthase OS=Streptococcus suis SS12 GN=pyrG PE=3 SV=1 - [G7S370_STRSU]	nucleotide binding; catalytic activity		metabolic process	1.03009	0.855841
B9WUQ9	Putative uncharacterized protein OS=Streptococcus suis 89/1591 GN=SsuiDRAFT_3327 PE=4 SV=1 - [B9WUQ9_STRSU]				0.879567	0.362401
R4NY00	CBS domain containing protein OS=Streptococcus suis TL13 GN=TL13_1508 PE=4 SV=1 - [R4NY00_STRSU]				0.833207	0.195861
A4W2N6	tRNA modification GTPase MnmE OS=Streptococcus suis (strain 98HAH33) GN=mnmE PE=3 SV=1 - [MNME_STRS2]	catalytic activity; receptor activity; signal transducer activity; nucleotide binding; transporter activity; metal ion binding	cytoplasm; membrane	cell communication; regulation of biological process; response to stimulus; metabolic process; transport	1.16056	0.354038
F4ECH1	GTP-sensing transcriptional pleiotropic repressor CodY OS=Streptococcus suis GN=codY PE=3 SV=1 - [F4ECH1_STRSU]	nucleotide binding; DNA binding	cytoplasm	metabolic process; regulation of biological process	0.979113	0.878272
D5AJ46	ATP-dependent RNA helicase, DEAD/DEAH box family OS=Streptococcus suis (strain GZ1) GN=SSGZ1_1405 PE=4 SV=1 - [D5AJ46_STRGZ]	nucleotide binding; catalytic activity			1.17266	0.321389
D5AI72	Putative ribose 5-phosphate isomerase OS=Streptococcus suis (strain GZ1) GN=SSGZ1_1080 PE=4 SV=1 - [D5AI72_STRGZ]	catalytic activity	membrane	metabolic process	0.856599	0.272303
G7S706	Transcriptional regulator OS=Streptococcus suis SS12 GN=SSU12_1041 PE=4 SV=1 - [G7S706_STRSU]				1.21846	0.21833
G7SMP4	SAM-dependent methyltransferase OS=Streptococcus suis ST1 GN=SSUST1_0658 PE=4 SV=1 - [G7SMP4_STRSU]	catalytic activity		metabolic process	1.06226	0.70853
G7S5K5	Dihydroxyacetone kinase OS=Streptococcus suis SS12 GN=SSU12_1894 PE=4 SV=1 - [G7S5K5_STRSU]	catalytic activity		metabolic process	1.09027	0.59165
A5JSI8	HPr kinase/phosphorylase OS=Streptococcus suis GN=hprK PE=3 SV=1 - [A5JSI8_STRSU]	catalytic activity; receptor activity; signal transducer activity; nucleotide binding; metal ion binding		cell communication; regulation of biological process; response to stimulus; metabolic process	1.05559	0.738021
G5L1E1	Acetyltransferase (GNAT) family protein OS=Streptococcus suis R61 GN=SSUR61_1923 PE=4 SV=1 - [G5L1E1_STRSU]	catalytic activity	membrane		0.84986	0.248669
R4NWI8	Uncharacterized protein OS=Streptococcus suis TL13 GN=TL13_1697 PE=4 SV=1 - [R4NWI8_STRSU]				1.0633	0.703965
R4NXU7	DNA-binding protein HBsu OS=Streptococcus suis TL13 GN=TL13_1443 PE=3 SV=1 - [R4NXU7_STRSU]	DNA binding			0.884687	0.384418
G7S268	Membrane carboxypeptidase (Penicillin-binding protein) OS=Streptococcus suis SS12 GN=SSU12_0120 PE=4 SV=1 - [G7S268_STRSU]	catalytic activity		metabolic process	0.960002	0.76994
G7S4Y6	Putative uncharacterized protein OS=Streptococcus suis SS12 GN=SSU12_0612 PE=4 SV=1 - [G7S4Y6_STRSU]	catalytic activity; protein binding; nucleotide binding		metabolic process	0.956709	0.751445
A4W1W0	ATP synthase subunit delta OS=Streptococcus suis (strain 98HAH33) GN=atpH PE=3 SV=1 - [ATPD_STRS2]	catalytic activity; transporter activity	membrane	metabolic process; transport	0.826766	0.17757
G7SAI5	Lipoprotein OS=Streptococcus suis D9 GN=SSUD9_1779 PE=3 SV=1 - [G7SAI5_STRSU]				1.10817	0.52336
M1UG60	Zinc metalloprotease zmpC OS=Streptococcus suis SC070731 GN=NJAUSS_0959 PE=4 SV=1 - [M1UG60_STRSU]	catalytic activity; metal ion binding	extracellular; membrane	metabolic process	1.03299	0.842049
C6GNL8	30S ribosomal protein S21 OS=Streptococcus suis (strain SC84) GN=rpsU PE=3 SV=1 - [C6GNL8_STRSX]	structural molecule activity	cytoplasm; ribosome	metabolic process	1.54547	0.00659988
A4W1U2	Mannonate dehydratase OS=Streptococcus suis (strain 98HAH33) GN=uxuA PE=3 SV=1 - [UXUA_STRS2]	catalytic activity		metabolic process	1.28129	0.122315
G7S5X6	Translation initiation factor 1 OS=Streptococcus suis SS12 GN=SSU12_0798 PE=4 SV=1 - [G7S5X6_STRSU]	RNA binding		metabolic process	1.17144	0.324578
G7S2F2	ADP-ribose pyrophosphatase OS=Streptococcus suis SS12 GN=SSU12_1328 PE=4 SV=1 - [G7S2F2_STRSU]	catalytic activity			0.746411	0.0383796
G7S1G0	Cell shape-determining protein MreC OS=Streptococcus suis SS12 GN=SSU12_0019 PE=3 SV=1 - [G7S1G0_STRSU]			cell organization and biogenesis; regulation of biological process	0.995349	0.970529
C6GXE1	NIF3 (NGG1p interacting factor 3) family protein OS=Streptococcus suis (strain BM407) GN=SSUBM407_0654 PE=3 SV=1 - [C6GXE1_STRS4]				0.930073	0.605672
Q9X4U6	Chain length determinant protein/polysaccharide export protein OS=Streptococcus suis GN=cps2B PE=4 SV=1 - [Q9X4U6_STRSU]		membrane	metabolic process	0.903972	0.473124
G7S2G7	Putative uncharacterized protein OS=Streptococcus suis SS12 GN=SSU12_1343 PE=4 SV=1 - [G7S2G7_STRSU]				0.784901	0.0862593
A4VZM9	DNA-directed RNA polymerase subunit omega OS=Streptococcus suis (strain 98HAH33) GN=rpoZ PE=3 SV=1 - [RPOZ_STRS2]	DNA binding; catalytic activity		metabolic process	1.01265	0.940233
A4W2H3	SsrA-binding protein OS=Streptococcus suis (strain 98HAH33) GN=smpB PE=3 SV=1 - [SSRP_STRS2]	RNA binding	cytoplasm		1.24149	0.177659
A4W246	Chorismate synthase OS=Streptococcus suis (strain 98HAH33) GN=aroC PE=3 SV=1 - [AROC_STRS2]	catalytic activity		metabolic process	0.893618	0.424403
G7S5U7	Putative uncharacterized protein OS=Streptococcus suis SS12 GN=SSU12_0769 PE=4 SV=1 - [G7S5U7_STRSU]				0.859714	0.283661
A4VZZ0	Phosphoenolpyruvate carboxylase OS=Streptococcus suis (strain 98HAH33) GN=ppc PE=3 SV=1 - [CAPP_STRS2]	metal ion binding; catalytic activity		metabolic process	0.94044	0.661436
E8ULA6	Phosphatase OS=Streptococcus suis (strain JS14) GN=SSUJS14_1127 PE=4 SV=1 - [E8ULA6_STREJ]	catalytic activity		metabolic process	1.22483	0.206395
M1TKN6	Signal recognition particle GTPase OS=Streptococcus suis SC070731 GN=NJAUSS_1480 PE=4 SV=1 - [M1TKN6_STRSU]				0.878934	0.359726
G7S493	SNF2 family DNA/RNA helicase OS=Streptococcus suis SS12 GN=SSU12_1668 PE=4 SV=1 - [G7S493_STRSU]	nucleotide binding; DNA binding; catalytic activity; metal ion binding			1.05223	0.753097
A4W257	Uncharacterized protein OS=Streptococcus suis (strain 98HAH33) GN=SSU98_1288 PE=4 SV=1 - [A4W257_STRS2]		membrane		0.912944	0.517233
G5KX18	Rod shape determining protein OS=Streptococcus suis R61 GN=SSUR61_0236 PE=4 SV=1 - [G5KX18_STRSU]		membrane		0.886595	0.392791
G7S5S0	Small molecule binding protein OS=Streptococcus suis SS12 GN=SSU12_1959 PE=4 SV=1 - [G7S5S0_STRSU]				0.858966	0.28091
A4VZT9	UDP-N-acetylglucosamine--N-acetylmuramyl-(pentapeptide) pyrophosphoryl-undecaprenol N-acetylglucosamine transferase OS=Streptococcus suis (strain 98HAH33) GN=murG PE=3 SV=1 - [MURG_STRS2]	catalytic activity	membrane	metabolic process; cell organization and biogenesis; regulation of biological process; cell division	1.03965	0.810789
G7RWA9	5'-methylthioadenosine/S-adenosylhomocysteine nucleosidase OS=Streptococcus suis A7 GN=SSUA7_1413 PE=4 SV=1 - [G7RWA9_STRSU]	catalytic activity		metabolic process	1.11612	0.494712
C5VXW0	ABC transporter permease protein OS=Streptococcus suis (strain P1/7) GN=SSU1210 PE=4 SV=1 - [C5VXW0_STRSE]		membrane		1.11294	0.506025
A4VWM6	UPF0298 protein SSU05_1549 OS=Streptococcus suis (strain 05ZYH33) GN=SSU05_1549 PE=3 SV=1 - [Y1549_STRSY]		cytoplasm		1.23853	0.182518
G7S2I4	UDP-N-acetylmuramyl tripeptide synthase OS=Streptococcus suis SS12 GN=SSU12_1360 PE=4 SV=1 - [G7S2I4_STRSU]	nucleotide binding		metabolic process	1.06278	0.706271
Q83VN5	Putative uncharacterized protein orf201 (Fragment) OS=Streptococcus suis GN=orf201 PE=4 SV=1 - [Q83VN5_STRSU]	catalytic activity		metabolic process	0.944588	0.684134
F4EFZ3	Chromosomal replication initiator protein DnaA OS=Streptococcus suis GN=dnaA PE=3 SV=1 - [F4EFZ3_STRSU]	nucleotide binding; DNA binding; catalytic activity	cytoplasm	metabolic process; regulation of biological process	1.00495	0.978206
G7SJF4	ABC transporter related protein OS=Streptococcus suis ST1 GN=SSUST1_1385 PE=3 SV=1 - [G7SJF4_STRSU]	nucleotide binding; catalytic activity		metabolic process	1.41272	0.0311414
A4W0U7	4-hydroxy-tetrahydrodipicolinate reductase OS=Streptococcus suis (strain 98HAH33) GN=dapB PE=3 SV=1 - [DAPB_STRS2]	nucleotide binding; catalytic activity	cytoplasm	metabolic process	0.901681	0.462136
A4VYI3	Ribosome-associated heat shock protein implicated in the recycling of the 50S subunit OS=Streptococcus suis (strain 98HAH33) GN=SSU98_0012 PE=4 SV=1 - [A4VYI3_STRS2]	RNA binding		response to stimulus	1.28457	0.118495
E8UKK3	Isoleucine--tRNA ligase OS=Streptococcus suis (strain JS14) GN=ileS PE=3 SV=1 - [E8UKK3_STREJ]	nucleotide binding; catalytic activity; metal ion binding	cytoplasm	metabolic process; regulation of biological process	0.941582	0.667663
G5L200	Metal-sulfur cluster biosynthetic protein OS=Streptococcus suis R61 GN=SSUR61_2042 PE=4 SV=1 - [G5L200_STRSU]		membrane		0.951712	0.723535
Q84BJ2	Putative acyltransferase OS=Streptococcus suis PE=4 SV=1 - [Q84BJ2_STRSU]	catalytic activity	membrane		0.806752	0.12815
D5AJH2	Predicted transcriptional regulator containing the HTH domain OS=Streptococcus suis (strain GZ1) GN=SSGZ1_1531 PE=3 SV=1 - [D5AJH2_STRGZ]		cytoplasm	cell division	0.837187	0.207757
D5AJ20	Branched-chain amino acid ABC transporter, permease protein OS=Streptococcus suis (strain GZ1) GN=SSGZ1_1379 PE=4 SV=1 - [D5AJ20_STRGZ]	transporter activity	membrane	transport	0.851645	0.254802
J7KRD0	Beta-fructosidases (Levanase/invertase) OS=Streptococcus suis S735 GN=YYK_07765 PE=3 SV=1 - [J7KRD0_STRSU]	catalytic activity	cytoplasm	metabolic process	1.0037	0.984407
G7SMM9	Putative uncharacterized protein OS=Streptococcus suis ST1 GN=SSUST1_0641 PE=4 SV=1 - [G7SMM9_STRSU]				0.739951	0.0329899
G5L156	Malonyl CoA-acyl carrier protein transacylase OS=Streptococcus suis R61 GN=SSUR61_1837 PE=3 SV=1 - [G5L156_STRSU]	catalytic activity; protein binding	membrane	metabolic process	0.873645	0.337791
R4NTP2	Uncharacterized protein OS=Streptococcus suis TL13 GN=TL13_0667 PE=4 SV=1 - [R4NTP2_STRSU]				1.05903	0.722742
G7SKL9	DNA replication and repair protein RecF OS=Streptococcus suis ST1 GN=recF PE=3 SV=1 - [G7SKL9_STRSU]	nucleotide binding; DNA binding	cytoplasm	metabolic process; response to stimulus; cell communication	1.09833	0.560251
A4VVZ3	tRNA dimethylallyltransferase OS=Streptococcus suis (strain 05ZYH33) GN=miaA PE=3 SV=1 - [MIAA_STRSY]	nucleotide binding; catalytic activity		metabolic process	1.51088	0.010025
B9WXA7	Putative uncharacterized protein OS=Streptococcus suis 89/1591 GN=SsuiDRAFT_2396 PE=4 SV=1 - [B9WXA7_STRSU]				0.678277	0.00601093
G7S2I9	ABC transporter ATP-binding protein OS=Streptococcus suis SS12 GN=SSU12_1365 PE=3 SV=1 - [G7S2I9_STRSU]	nucleotide binding; catalytic activity		metabolic process	1.1355	0.42929
A4W333	Uncharacterized protein containing a divergent version of the methyl-accepting chemotaxis-like domain OS=Streptococcus suis (strain 98HAH33) GN=SSU98_1614 PE=4 SV=1 - [A4W333_STRS2]		membrane		0.863868	0.299239
G7S3B8	ABC-type branched-chain amino acid transport system, ATPase component OS=Streptococcus suis SS12 GN=SSU12_1490 PE=3 SV=1 - [G7S3B8_STRSU]	nucleotide binding; catalytic activity		metabolic process	0.984843	0.910882
G7S2H0	Putative uncharacterized protein OS=Streptococcus suis SS12 GN=SSU12_1346 PE=4 SV=1 - [G7S2H0_STRSU]				0.860939	0.288206
A4VV81	ABC-type multidrug transport system, ATPase and permease component OS=Streptococcus suis (strain 05ZYH33) GN=SSU05_1054 PE=3 SV=1 - [A4VV81_STRSY]	nucleotide binding; catalytic activity; transporter activity	membrane	metabolic process; transport	0.790012	0.0949964
G7RZP9	Putative NADP-dependent L-serine/L-allo-threonine dehydrogenase OS=Streptococcus suis A7 GN=SSUA7_0791 PE=3 SV=1 - [G7RZP9_STRSU]	nucleotide binding; catalytic activity	membrane	metabolic process	1.01153	0.945709
F4EEM6	Zn-dependent hydrolase, including glyoxylases OS=Streptococcus suis GN=SSUST3_0727 PE=4 SV=1 - [F4EEM6_STRSU]	catalytic activity			0.803637	0.121437
G7SLN9	Transcriptional regulator OS=Streptococcus suis ST1 GN=SSUST1_0124 PE=4 SV=1 - [G7SLN9_STRSU]			metabolic process; regulation of biological process	0.994649	0.966568
G5KXY4	Putative uncharacterized protein OS=Streptococcus suis R61 GN=SSUR61_0553 PE=4 SV=1 - [G5KXY4_STRSU]		membrane		0.799732	0.113377
G7S242	Putative ABC transporter OS=Streptococcus suis SS12 GN=SSU12_1298 PE=3 SV=1 - [G7S242_STRSU]	nucleotide binding; catalytic activity; transporter activity	membrane	metabolic process; transport	1.88347	7.74495e-05
G7S404	Cell division protein ftsA OS=Streptococcus suis SS12 GN=ftsA PE=3 SV=1 - [G7S404_STRSU]	protein binding		cell organization and biogenesis; regulation of biological process; cell division	1.03244	0.844678
G7S454	Haloacid dehalogenase-like hydrolase OS=Streptococcus suis SS12 GN=SSU12_0492 PE=4 SV=1 - [G7S454_STRSU]	catalytic activity		metabolic process	0.936706	0.641182
A4W299	Ribonuclease Z OS=Streptococcus suis (strain 98HAH33) GN=rnz PE=3 SV=1 - [RNZ_STRS2]	catalytic activity; metal ion binding		metabolic process	1.03404	0.837119
F4EEN1	Transcriptional regulator OS=Streptococcus suis GN=SSUST3_0732 PE=4 SV=1 - [F4EEN1_STRSU]	DNA binding		metabolic process; regulation of biological process	0.855113	0.26698
G7S6U6	Adenylate cyclase OS=Streptococcus suis SS12 GN=SSU12_0981 PE=4 SV=1 - [G7S6U6_STRSU]			metabolic process	0.81502	0.147231
N1K119	Antioxidant protein (Fragment) OS=Streptococcus suis GN=dpr PE=3 SV=1 - [N1K119_STRSU]	metal ion binding; catalytic activity		cellular homeostasis; response to stimulus; metabolic process	1.37198	0.0485617
A4VUR5	ABC-type antimicrobial peptide transport system, permease component OS=Streptococcus suis (strain 05ZYH33) GN=SSU05_0888 PE=4 SV=1 - [A4VUR5_STRSY]		membrane		0.975152	0.855735
B9WTA1	Putative uncharacterized protein OS=Streptococcus suis 89/1591 GN=SsuiDRAFT_3549 PE=4 SV=1 - [B9WTA1_STRSU]		membrane		2.29085	2.27243e-07
F4EDQ0	Cell division protein OS=Streptococcus suis GN=ftsW PE=4 SV=1 - [F4EDQ0_STRSU]		membrane	cell division	0.984652	0.909796
G7S6V1	Redox-sensing transcriptional repressor rex OS=Streptococcus suis SS12 GN=rex PE=3 SV=1 - [G7S6V1_STRSU]	nucleotide binding; DNA binding	cytoplasm	metabolic process; regulation of biological process; response to stimulus	0.9476	0.700729
C6GPJ0	Sensor histidine kinase OS=Streptococcus suis (strain SC84) GN=SSUSC84_1499 PE=4 SV=1 - [C6GPJ0_STRSX]	catalytic activity; receptor activity; signal transducer activity; nucleotide binding	membrane	cell communication; regulation of biological process; response to stimulus; metabolic process	0.992769	0.955915
A4VW64	Amylase-binding protein B OS=Streptococcus suis (strain 05ZYH33) GN=SSU05_1387 PE=4 SV=1 - [A4VW64_STRSY]	catalytic activity	extracellular	metabolic process	1.0951	0.57271
G5KXR2	Uridine kinase OS=Streptococcus suis R61 GN=udk PE=3 SV=1 - [G5KXR2_STRSU]	nucleotide binding; catalytic activity	cytoplasm	metabolic process	0.892863	0.420946
G7S5V2	Transcriptional regulator/sugar kinase OS=Streptococcus suis SS12 GN=SSU12_0774 PE=4 SV=1 - [G7S5V2_STRSU]	catalytic activity	cytoplasm	metabolic process	1.02179	0.895678
G5KZQ2	Putative ferrichrome-binding protein OS=Streptococcus suis R61 GN=fhuD PE=4 SV=1 - [G5KZQ2_STRSU]				0.964674	0.796297
J7KPH9	ATPase or kinase OS=Streptococcus suis S735 GN=YYK_07945 PE=4 SV=1 - [J7KPH9_STRSU]	catalytic activity		metabolic process	1.24602	0.170457
G7S180	Signal recognition particle receptor FtsY OS=Streptococcus suis SS12 GN=ftsY PE=3 SV=1 - [G7S180_STRSU]	nucleotide binding; catalytic activity	cytoplasm; membrane	metabolic process; transport	0.857118	0.274175
M1UFL8	HsdM OS=Streptococcus suis SC070731 GN=NJAUSS_0750 PE=4 SV=1 - [M1UFL8_STRSU]	DNA binding; catalytic activity		metabolic process; regulation of biological process	0.910141	0.503275
G7SFL4	Putative beta-glucuronidase OS=Streptococcus suis D12 GN=uidA PE=4 SV=1 - [G7SFL4_STRSU]	catalytic activity		metabolic process	1.07425	0.657092
M1TKV9	Acyltransferase OS=Streptococcus suis SC070731 GN=NJAUSS_1565 PE=4 SV=1 - [M1TKV9_STRSU]	catalytic activity	membrane		1.20116	0.253614
G7S3P2	Transcriptional regulator OS=Streptococcus suis SS12 GN=SSU12_0411 PE=4 SV=1 - [G7S3P2_STRSU]	DNA binding		metabolic process; regulation of biological process	0.963507	0.789703
G7S5B1	Acetyltransferase OS=Streptococcus suis SS12 GN=SSU12_1877 PE=4 SV=1 - [G7S5B1_STRSU]	catalytic activity			1.24644	0.169801
G7S6Y8	Bifunctional riboflavin kinase/FMN adenylyltransferase OS=Streptococcus suis SS12 GN=ribC PE=4 SV=1 - [G7S6Y8_STRSU]	catalytic activity		metabolic process	0.916879	0.537086
G7SA24	Cold-shock DNA-binding domain protein OS=Streptococcus suis D9 GN=SSUD9_0428 PE=3 SV=1 - [G7SA24_STRSU]	DNA binding	cytoplasm	metabolic process; regulation of biological process	0.394546	4.83543e-11
G5KYV5	Phosphotransferase system IIC component, glucose/maltose/N-acetylglucosamine-specific OS=Streptococcus suis R61 GN=SSUR61_0818 PE=4 SV=1 - [G5KYV5_STRSU]	transporter activity; catalytic activity	membrane	transport; metabolic process	0.993782	0.961657
G7S177	Glucose-6-phosphate 1-dehydrogenase OS=Streptococcus suis SS12 GN=SSU12_1091 PE=3 SV=1 - [G7S177_STRSU]	nucleotide binding; catalytic activity		metabolic process	0.859101	0.281405
G7S215	CoA-binding protein OS=Streptococcus suis SS12 GN=SSU12_1271 PE=4 SV=1 - [G7S215_STRSU]	nucleotide binding			0.891578	0.415098
G7S1M6	dTDP-4-dehydrorhamnose 3,5-epimerase OS=Streptococcus suis SS12 GN=SSU12_1197 PE=4 SV=1 - [G7S1M6_STRSU]	catalytic activity		metabolic process	0.844547	0.230953
G7S3A1	SAM-dependent methyltransferase OS=Streptococcus suis SS12 GN=SSU12_0349 PE=4 SV=1 - [G7S3A1_STRSU]	catalytic activity		metabolic process	1.04767	0.77377
G7S480	Putative diaminopimelate decarboxylase OS=Streptococcus suis SS12 GN=SSU12_1655 PE=3 SV=1 - [G7S480_STRSU]	catalytic activity		metabolic process	1.06944	0.677448
R4NLK2	50S ribosomal protein L21 OS=Streptococcus suis TL13 GN=rplU PE=3 SV=1 - [R4NLK2_STRSU]		cytoplasm; ribosome		1.04523	0.784965
G7S4N1	S-adenosylmethionine:tRNA ribosyltransferase-isomerase OS=Streptococcus suis SS12 GN=queA PE=3 SV=1 - [G7S4N1_STRSU]	catalytic activity	cytoplasm	metabolic process	0.943556	0.678466
E8ULG4	Putative unsaturated glucuronyl hydrolase OS=Streptococcus suis (strain JS14) GN=ugl PE=4 SV=1 - [E8ULG4_STREJ]	catalytic activity		metabolic process	1.16647	0.337782
A4VT70	RecG-like helicase OS=Streptococcus suis (strain 05ZYH33) GN=SSU05_0342 PE=4 SV=1 - [A4VT70_STRSY]	nucleotide binding; DNA binding; catalytic activity	membrane	metabolic process; response to stimulus; transport	1.17674	0.310915
B9WWI0	Putative uncharacterized protein OS=Streptococcus suis 89/1591 GN=SsuiDRAFT_2754 PE=4 SV=1 - [B9WWI0_STRSU]				0.984417	0.908461
A4W224	Parvulin-like peptidyl-prolyl isomerase OS=Streptococcus suis (strain 98HAH33) GN=SSU98_1255 PE=4 SV=1 - [A4W224_STRS2]	catalytic activity			1.08265	0.622293
C5VWR4	Putative A/G-specific adenine glycosylase OS=Streptococcus suis (strain P1/7) GN=mutY PE=4 SV=1 - [C5VWR4_STRSE]	DNA binding; catalytic activity		metabolic process; response to stimulus	1.30838	0.0937679
G7S3I8	Aldo/keto reductase family oxidoreductase OS=Streptococcus suis SS12 GN=SSU12_1560 PE=4 SV=1 - [G7S3I8_STRSU]	catalytic activity		metabolic process	0.873725	0.338114
A4W2G1	Glucose-6-phosphate isomerase OS=Streptococcus suis (strain 98HAH33) GN=SSU98_1392 PE=4 SV=1 - [A4W2G1_STRS2]	catalytic activity			0.924003	0.573755
G8DTL5	Cps1/2F OS=Streptococcus suis GN=cps1/2F PE=4 SV=1 - [G8DTL5_STRSU]	catalytic activity		metabolic process	1.13508	0.430633
G7S183	Chromosome partition protein Smc OS=Streptococcus suis SS12 GN=smc PE=3 SV=1 - [G7S183_STRSU]	nucleotide binding; DNA binding; protein binding	chromosome; cytoplasm	metabolic process; response to stimulus; cell organization and biogenesis	1.04669	0.778256
G7S220	Peptide ABC transporter ATPase OS=Streptococcus suis SS12 GN=SSU12_1276 PE=3 SV=1 - [G7S220_STRSU]	nucleotide binding; catalytic activity		metabolic process	1.16648	0.337751
G5L2Y5	Putative uncharacterized protein OS=Streptococcus suis R61 GN=SSUR61_1048 PE=4 SV=1 - [G5L2Y5_STRSU]	protein binding	membrane	transport; cell organization and biogenesis	0.707796	0.0144389
D3VNC9	UDP-galactopyranose mutase OS=Streptococcus suis GN=glf PE=4 SV=1 - [D3VNC9_STRSU]	nucleotide binding; catalytic activity			0.86919	0.319898
R4NWG7	50S ribosomal protein L10 OS=Streptococcus suis TL13 GN=rplJ PE=3 SV=1 - [R4NWG7_STRSU]		cytoplasm; ribosome		0.988041	0.929066
G7RZP7	Uncharacterized protein OS=Streptococcus suis A7 GN=SSUA7_0789 PE=4 SV=1 - [G7RZP7_STRSU]				1.30394	0.0980005
A4W1V7	ATP synthase subunit beta OS=Streptococcus suis (strain 98HAH33) GN=atpD PE=3 SV=2 - [ATPB_STRS2]	nucleotide binding; catalytic activity; transporter activity	membrane	metabolic process; transport	1.09521	0.572281
G7RZ18	Sortase-like protein OS=Streptococcus suis A7 GN=SSUA7_1913 PE=4 SV=1 - [G7RZ18_STRSU]				2.7915	1.45032e-10
D5AKA7	Permease of the major facilitator superfamily OS=Streptococcus suis (strain GZ1) GN=SSGZ1_1816 PE=4 SV=1 - [D5AKA7_STRGZ]		membrane		1.08008	0.632824
J7KN90	Amino acid ABC transporter substrate-binding protein OS=Streptococcus suis S735 GN=YYK_02400 PE=4 SV=1 - [J7KN90_STRSU]	transporter activity		transport	0.743885	0.0361942
G7S401	UDP-N-acetylmuramoylalanine--D-glutamate ligase OS=Streptococcus suis SS12 GN=murD PE=3 SV=1 - [G7S401_STRSU]	nucleotide binding; catalytic activity	cytoplasm	cell organization and biogenesis; regulation of biological process; metabolic process; cell division	0.99508	0.969006
A4W1R3	Predicted membrane protein OS=Streptococcus suis (strain 98HAH33) GN=SSU98_1144 PE=4 SV=1 - [A4W1R3_STRS2]				0.822871	0.167081
G7S2E0	Pyruvate-formate lyase OS=Streptococcus suis SS12 GN=SSU12_0194 PE=3 SV=1 - [G7S2E0_STRSU]	catalytic activity	cytoplasm	metabolic process	1.00352	0.985287
B9WVK8	Putative uncharacterized protein OS=Streptococcus suis 89/1591 GN=SsuiDRAFT_3004 PE=4 SV=1 - [B9WVK8_STRSU]				1.16784	0.334106
G7S3X5	Response regulator OS=Streptococcus suis SS12 GN=SSU12_1631 PE=4 SV=1 - [G7S3X5_STRSU]	signal transducer activity; DNA binding		cell communication; regulation of biological process; response to stimulus; metabolic process	1.00214	0.992162
G7S6J6	Putative uncharacterized protein OS=Streptococcus suis SS12 GN=SSU12_2074 PE=4 SV=1 - [G7S6J6_STRSU]				1.10123	0.54923
G7S2K5	Putative uncharacterized protein OS=Streptococcus suis SS12 GN=SSU12_1381 PE=4 SV=1 - [G7S2K5_STRSU]				0.94684	0.696531
A4W4M5	30S ribosomal protein S4 OS=Streptococcus suis (strain 98HAH33) GN=rpsD PE=3 SV=1 - [RS4_STRS2]	RNA binding; structural molecule activity	cytoplasm; ribosome	metabolic process	1.0501	0.762717
G5L260	UPF0371 protein SSUR61_2266 OS=Streptococcus suis R61 GN=SSUR61_2266 PE=3 SV=1 - [G5L260_STRSU]				1.06217	0.70892
J7KEW5	Uncharacterized protein OS=Streptococcus suis S735 GN=YYK_00835 PE=3 SV=1 - [J7KEW5_STRSU]	DNA binding	cytoplasm		0.774211	0.0699277
G7S228	Ribonuclease R OS=Streptococcus suis SS12 GN=rnr PE=3 SV=1 - [G7S228_STRSU]	RNA binding; catalytic activity	cytoplasm	metabolic process	1.18047	0.301563
A4VVG6	D-beta-hydroxybutyrate permease OS=Streptococcus suis (strain 05ZYH33) GN=SSU05_1140 PE=4 SV=1 - [A4VVG6_STRSY]	transporter activity	membrane	transport	0.9966	0.977609
G7S3Q5	Putative uncharacterized protein OS=Streptococcus suis SS12 GN=SSU12_0424 PE=4 SV=1 - [G7S3Q5_STRSU]				0.945786	0.69072
A4W428	DNA polymerase III PolC-type OS=Streptococcus suis (strain 98HAH33) GN=polC PE=3 SV=1 - [DPO3_STRS2]	DNA binding; catalytic activity	cytoplasm	metabolic process	1.15136	0.380439
G7S4Z3	Ribosomal RNA small subunit methyltransferase I OS=Streptococcus suis SS12 GN=rsmI PE=3 SV=1 - [G7S4Z3_STRSU]	catalytic activity	cytoplasm	metabolic process	1.12873	0.45143
A4W496	Glutamate--tRNA ligase OS=Streptococcus suis (strain 98HAH33) GN=gltX PE=3 SV=2 - [SYE_STRS2]	RNA binding; nucleotide binding; catalytic activity	cytoplasm	metabolic process	1.00677	0.969217
G7RWZ0	Ferric uptake regulator family protein OS=Streptococcus suis A7 GN=SSUA7_0290 PE=4 SV=1 - [G7RWZ0_STRSU]	DNA binding		metabolic process; regulation of biological process	0.971951	0.837544
A4W2K0	Cation transport ATPase OS=Streptococcus suis (strain 98HAH33) GN=SSU98_1431 PE=3 SV=1 - [A4W2K0_STRS2]	nucleotide binding; catalytic activity; transporter activity; metal ion binding	membrane	transport; metabolic process	0.940105	0.659615
G7S1D1	Methionine--tRNA ligase OS=Streptococcus suis SS12 GN=metG PE=3 SV=1 - [G7S1D1_STRSU]	RNA binding; nucleotide binding; catalytic activity	cytoplasm	metabolic process	1.03778	0.819527
G7SLW5	Lactoylglutathione lyase-related lyase OS=Streptococcus suis ST1 GN=SSUST1_0616 PE=4 SV=1 - [G7SLW5_STRSU]	catalytic activity			1.11144	0.511439
A4W3A5	Probable dual-specificity RNA methyltransferase RlmN OS=Streptococcus suis (strain 98HAH33) GN=rlmN PE=3 SV=1 - [RLMN_STRS2]	RNA binding; catalytic activity; metal ion binding	cytoplasm	metabolic process	0.908685	0.496086
G7S3T4	Acetyl-CoA acetyltransferase OS=Streptococcus suis SS12 GN=SSU12_1588 PE=3 SV=1 - [G7S3T4_STRSU]	catalytic activity		metabolic process	0.955867	0.746729
J7KKJ8	Cation-transporting ATPase OS=Streptococcus suis S735 GN=YYK_01355 PE=3 SV=1 - [J7KKJ8_STRSU]	nucleotide binding; catalytic activity; transporter activity; metal ion binding	membrane	transport	1.05611	0.735677
A4W0W0	Elongation factor 4 OS=Streptococcus suis (strain 98HAH33) GN=lepA PE=3 SV=1 - [LEPA_STRS2]	nucleotide binding; RNA binding; catalytic activity	membrane	metabolic process; cell communication; regulation of biological process; response to stimulus	0.949868	0.713291
G7S619	Glucose-1-phosphate-uridylyltransferase OS=Streptococcus suis SS12 GN=SSU12_1977 PE=4 SV=1 - [G7S619_STRSU]	catalytic activity		metabolic process	0.838407	0.211493
G7S1R0	Lactoylglutathione lyase-related lyase OS=Streptococcus suis SS12 GN=SSU12_1231 PE=4 SV=1 - [G7S1R0_STRSU]	catalytic activity			1.09231	0.583587
G7S5M5	Putative bacterocin transport accessory protein, Bta OS=Streptococcus suis SS12 GN=SSU12_1914 PE=4 SV=1 - [G7S5M5_STRSU]			cellular homeostasis; regulation of biological process	0.928897	0.599444
G7S6W1	ABC-type uncharacterized transport system, ATPase component OS=Streptococcus suis SS12 GN=SSU12_0996 PE=3 SV=1 - [G7S6W1_STRSU]	nucleotide binding; catalytic activity		metabolic process	0.929452	0.60238
G7S2K3	Alpha-acetolactate decarboxylase OS=Streptococcus suis SS12 GN=SSU12_1379 PE=4 SV=1 - [G7S2K3_STRSU]	catalytic activity	cytoplasm; endoplasmic reticulum; membrane	metabolic process	0.869251	0.320141
A4W3G1	Transcriptional repressor NrdR OS=Streptococcus suis (strain 98HAH33) GN=nrdR PE=3 SV=1 - [NRDR_STRS2]	nucleotide binding; DNA binding; metal ion binding		metabolic process; regulation of biological process	1.19569	0.265661
A4W3D7	Glutamate racemase OS=Streptococcus suis (strain 98HAH33) GN=murI PE=3 SV=1 - [MURI_STRS2]	catalytic activity		metabolic process; cell organization and biogenesis; regulation of biological process	1.33913	0.0686105
A4VTD0	Probable transcriptional regulatory protein SSU05_0402 OS=Streptococcus suis (strain 05ZYH33) GN=SSU05_0402 PE=3 SV=1 - [Y402_STRSY]	DNA binding	cytoplasm	metabolic process; regulation of biological process	0.811772	0.139515
A4W2M7	Ribose-5-phosphate isomerase A OS=Streptococcus suis (strain 98HAH33) GN=rpiA PE=3 SV=1 - [RPIA_STRS2]	catalytic activity		metabolic process	1.03385	0.837988
G5L119	Putative uncharacterized protein OS=Streptococcus suis R61 GN=SSUR61_1800 PE=4 SV=1 - [G5L119_STRSU]		membrane	metabolic process	0.996027	0.974366
A4VW83	ABC-type multidrug transport system, ATPase and permease component OS=Streptococcus suis (strain 05ZYH33) GN=SSU05_1406 PE=3 SV=1 - [A4VW83_STRSY]	nucleotide binding; catalytic activity; transporter activity	membrane	metabolic process; transport	1.49558	0.0120273
G5L0N6	Metalloendopeptidase OS=Streptococcus suis R61 GN=SSUR61_1665 PE=4 SV=1 - [G5L0N6_STRSU]	catalytic activity		metabolic process	0.945893	0.691312
G7S2E7	Large-conductance mechanosensitive channel OS=Streptococcus suis SS12 GN=SSU12_1323 PE=3 SV=1 - [G7S2E7_STRSU]	transporter activity	membrane	transport	1.24846	0.166673
M1UWN6	Cell wall biosynthesis glycosyltransferase OS=Streptococcus suis SC070731 GN=NJAUSS_1967 PE=4 SV=1 - [M1UWN6_STRSU]	catalytic activity			1.26308	0.145483
B9WVD6	Putative uncharacterized protein (Fragment) OS=Streptococcus suis 89/1591 GN=SsuiDRAFT_3988 PE=4 SV=1 - [B9WVD6_STRSU]		membrane		2.22679	5.78223e-07
Q204F0	Cps1/2G OS=Streptococcus suis GN=cps2G PE=4 SV=1 - [Q204F0_STRSU]	catalytic activity		metabolic process	1.03653	0.825385
A4W1T3	Uncharacterized protein OS=Streptococcus suis (strain 98HAH33) GN=SSU98_1164 PE=4 SV=1 - [A4W1T3_STRS2]				0.868021	0.315292
C6GYA5	Putative ATPase OS=Streptococcus suis (strain BM407) GN=SSUBM407_1963 PE=4 SV=1 - [C6GYA5_STRS4]	nucleotide binding; catalytic activity	membrane	metabolic process; response to stimulus	0.842329	0.223798
A4VVR3	Alanine--tRNA ligase OS=Streptococcus suis (strain 05ZYH33) GN=alaS PE=3 SV=1 - [SYA_STRSY]	RNA binding; nucleotide binding; catalytic activity; metal ion binding	cytoplasm	metabolic process	1.00205	0.992626
A4VYQ5	50S ribosomal protein L5 OS=Streptococcus suis (strain 98HAH33) GN=rplE PE=3 SV=1 - [RL5_STRS2]	RNA binding; structural molecule activity	cytoplasm; ribosome	metabolic process	1.09261	0.582422
G7S9P7	UDP-N-acetylglucosamine 1-carboxyvinyltransferase OS=Streptococcus suis D9 GN=murZ PE=3 SV=1 - [G7S9P7_STRSU]	catalytic activity	cytoplasm; membrane	cell organization and biogenesis; regulation of biological process; metabolic process; cell division	1.11846	0.486472
G7RZA4	Topoisomerase IV subunit B OS=Streptococcus suis A7 GN=parE PE=3 SV=1 - [G7RZA4_STRSU]	nucleotide binding; DNA binding; catalytic activity	chromosome; membrane	metabolic process	1.09849	0.559624
C6GVX0	BipA family GTPase OS=Streptococcus suis (strain BM407) GN=SSUBM407_0409 PE=4 SV=1 - [C6GVX0_STRS4]	nucleotide binding; catalytic activity		metabolic process	0.939342	0.655461
G7S1E3	Tagatose 1,6-diphosphate aldolase OS=Streptococcus suis SS12 GN=lacD2 PE=3 SV=1 - [G7S1E3_STRSU]	catalytic activity		metabolic process	0.740493	0.0334174
G5KZV2	Cysteine synthase OS=Streptococcus suis R61 GN=cysM PE=3 SV=1 - [G5KZV2_STRSU]	catalytic activity	membrane	metabolic process	0.726445	0.023674
G7S3Q3	Valine--tRNA ligase OS=Streptococcus suis SS12 GN=valS PE=3 SV=1 - [G7S3Q3_STRSU]	nucleotide binding; catalytic activity	cytoplasm	metabolic process; regulation of biological process	1.05835	0.725738
A4W3R2	Large exoprotein involved in heme utilization or adhesion OS=Streptococcus suis (strain 98HAH33) GN=SSU98_1843 PE=4 SV=1 - [A4W3R2_STRS2]				1.17707	0.310089
A4VWC3	Purine nucleoside phosphorylase OS=Streptococcus suis (strain 05ZYH33) GN=SSU05_1446 PE=4 SV=1 - [A4VWC3_STRSY]	catalytic activity		metabolic process	1.0344	0.835407
J7KJ84	S1 RNA-binding domain-containing protein OS=Streptococcus suis S735 GN=YYK_05520 PE=4 SV=1 - [J7KJ84_STRSU]	RNA binding			0.852862	0.259035
G7S4E0	Glutamine amidotransferase, class I OS=Streptococcus suis SS12 GN=SSU12_1715 PE=4 SV=1 - [G7S4E0_STRSU]	catalytic activity		metabolic process	0.97823	0.873248
G5KYA4	Putative uncharacterized protein OS=Streptococcus suis R61 GN=SSUR61_0629 PE=4 SV=1 - [G5KYA4_STRSU]				0.925962	0.58399
C6GUT4	AMP-binding enzyme OS=Streptococcus suis (strain BM407) GN=SSUBM407_0215 PE=4 SV=1 - [C6GUT4_STRS4]	catalytic activity	membrane	metabolic process	0.99796	0.985296
G7S3W4	Nicotinate phosphoribosyltransferase OS=Streptococcus suis SS12 GN=SSU12_1620 PE=3 SV=1 - [G7S3W4_STRSU]	catalytic activity	cytoplasm	metabolic process	1.03213	0.846117
G7S1H9	Adenylosuccinate lyase OS=Streptococcus suis SS12 GN=SSU12_0038 PE=4 SV=1 - [G7S1H9_STRSU]	catalytic activity		metabolic process	0.8998	0.453198
G7S4T4	Pyruvate/2-oxoglutarate dehydrogenase complex, dehydrogenase (E1) component, alpha subunit OS=Streptococcus suis SS12 GN=SSU12_1778 PE=4 SV=1 - [G7S4T4_STRSU]	catalytic activity		metabolic process	0.931819	0.614962
G7S387	Transcriptional regulator OS=Streptococcus suis SS12 GN=SSU12_0335 PE=4 SV=1 - [G7S387_STRSU]	DNA binding		metabolic process; regulation of biological process	0.941134	0.665217
G7S4U9	Methyl-accepting chemotaxis protein OS=Streptococcus suis SS12 GN=SSU12_1793 PE=4 SV=1 - [G7S4U9_STRSU]				0.975454	0.857453
G5L0Q7	ABC-type antimicrobial peptide transport system, permease component OS=Streptococcus suis R61 GN=SSUR61_1686 PE=3 SV=1 - [G5L0Q7_STRSU]	nucleotide binding; catalytic activity	membrane	metabolic process; transport; response to stimulus	0.870443	0.324876
G7S2P1	Signal peptidase I OS=Streptococcus suis SS12 GN=SSU12_0214 PE=3 SV=1 - [G7S2P1_STRSU]	catalytic activity	membrane	metabolic process	0.815761	0.14903
G7S190	Phosphoenolpyruvate-protein phosphotransferase OS=Streptococcus suis SS12 GN=SSU12_1104 PE=3 SV=1 - [G7S190_STRSU]	catalytic activity; transporter activity; metal ion binding	cytoplasm	transport; metabolic process	0.884254	0.382528
A4VYU4	DNA-directed RNA polymerase subunit beta' OS=Streptococcus suis (strain 98HAH33) GN=rpoC PE=3 SV=2 - [RPOC_STRS2]	DNA binding; catalytic activity		metabolic process	1.05502	0.74057
A4W083	Asparagine--tRNA ligase OS=Streptococcus suis (strain 98HAH33) GN=asnS PE=3 SV=1 - [SYN_STRS2]	nucleotide binding; catalytic activity	cytoplasm	metabolic process	0.972081	0.838282
G7S0J7	Oligoendopeptidase F OS=Streptococcus suis A7 GN=SSUA7_1094 PE=4 SV=1 - [G7S0J7_STRSU]	catalytic activity; metal ion binding		metabolic process	0.91361	0.520574
G7S2P7	Transcriptional regulator OS=Streptococcus suis SS12 GN=SSU12_0220 PE=4 SV=1 - [G7S2P7_STRSU]	DNA binding		metabolic process; regulation of biological process	0.933176	0.622208
C6GW68	Thioredoxin reductase OS=Streptococcus suis (strain BM407) GN=SSUBM407_1617 PE=3 SV=1 - [C6GW68_STRS4]	antioxidant activity; catalytic activity; nucleotide binding	cytoplasm	metabolic process; response to stimulus	0.972914	0.843013
A4W1V9	ATP synthase subunit alpha OS=Streptococcus suis (strain 98HAH33) GN=atpA PE=3 SV=1 - [ATPA_STRS2]	nucleotide binding; catalytic activity; transporter activity	membrane	metabolic process; transport	1.05311	0.749113
A4VUC8	GTPase obg OS=Streptococcus suis (strain 05ZYH33) GN=obg PE=3 SV=1 - [OBG_STRSY]	nucleotide binding; metal ion binding; catalytic activity; transporter activity	cytoplasm; membrane	metabolic process; transport	1.09462	0.574573
M1TK88	Uncharacterized protein OS=Streptococcus suis SC070731 GN=NJAUSS_1364 PE=4 SV=1 - [M1TK88_STRSU]				1.03481	0.833468
A4W4B5	2,3,4,5-tetrahydropyridine-2,6-dicarboxylate N-acetyltransferase OS=Streptococcus suis (strain 98HAH33) GN=dapH PE=3 SV=1 - [DAPH_STRS2]	catalytic activity		metabolic process	0.927873	0.594039
A4VZG5	Glutamyl-tRNA(Gln) amidotransferase subunit A OS=Streptococcus suis (strain 98HAH33) GN=gatA PE=3 SV=1 - [GATA_STRS2]	nucleotide binding; catalytic activity		metabolic process	0.835393	0.202339
R4NKT3	Superfamily I DNA and RNA helicase OS=Streptococcus suis TL13 GN=TL13_1380 PE=4 SV=1 - [R4NKT3_STRSU]	nucleotide binding; catalytic activity			0.885092	0.386188
G7S3J2	Phosphorylase OS=Streptococcus suis SS12 GN=glgP PE=3 SV=1 - [G7S3J2_STRSU]	catalytic activity		metabolic process	0.738918	0.0321872
G7S477	Non-canonical purine NTP pyrophosphatase OS=Streptococcus suis SS12 GN=SSU12_1652 PE=3 SV=1 - [G7S477_STRSU]	nucleotide binding; catalytic activity; metal ion binding		metabolic process	0.952932	0.730332
G5KXE5	Putative ABC transporter ATP-binding protein OS=Streptococcus suis R61 GN=SSUR61_0363 PE=3 SV=1 - [G5KXE5_STRSU]	nucleotide binding; catalytic activity; transporter activity	membrane	metabolic process; transport	1.03373	0.838549
Q5H848	Cps1/2Q OS=Streptococcus suis GN=cps2P PE=4 SV=1 - [Q5H848_STRSU]	catalytic activity		metabolic process	1.0154	0.926724
M1UHX4	DNA nuclease OS=Streptococcus suis SC070731 GN=NJAUSS_1813 PE=4 SV=1 - [M1UHX4_STRSU]				0.802099	0.118215
A4VS90	Predicted transcriptional regulator OS=Streptococcus suis (strain 05ZYH33) GN=SSU05_0005 PE=4 SV=1 - [A4VS90_STRSY]	DNA binding		metabolic process; regulation of biological process	1.02503	0.880054
G7SKX6	NUDIX hydrolase OS=Streptococcus suis ST1 GN=SSUST1_0492 PE=3 SV=1 - [G7SKX6_STRSU]	catalytic activity			1.05532	0.73924
R4NTL1	Foldase protein PrsA OS=Streptococcus suis TL13 GN=prsA PE=3 SV=1 - [R4NTL1_STRSU]				0.980198	0.884446
G7S729	Putative uncharacterized protein OS=Streptococcus suis SS12 GN=SSU12_1064 PE=4 SV=1 - [G7S729_STRSU]	catalytic activity		metabolic process	1.02606	0.875076
G7RWG6	Putative NADH-flavin reductase OS=Streptococcus suis A7 GN=SSUA7_0193 PE=4 SV=1 - [G7RWG6_STRSU]	nucleotide binding			0.855293	0.267618
G7S2A7	Putative molecular chaperone OS=Streptococcus suis SS12 GN=SSU12_0161 PE=4 SV=1 - [G7S2A7_STRSU]	catalytic activity		metabolic process	1.20961	0.235843
F4ECL7	Type I restriction-modification system, M subunit OS=Streptococcus suis GN=SSUST3_1624 PE=4 SV=1 - [F4ECL7_STRSU]	DNA binding; catalytic activity		metabolic process; regulation of biological process	0.953998	0.736281
B9WSR1	Cytosine-specific methyltransferase OS=Streptococcus suis 89/1591 GN=SsuiDRAFT_3952 PE=3 SV=1 - [B9WSR1_STRSU]	DNA binding; catalytic activity		metabolic process; regulation of biological process; defense response; response to stimulus	1.45308	0.0197409
F4EFD7	GMP synthase [glutamine-hydrolyzing] OS=Streptococcus suis GN=guaA PE=3 SV=1 - [F4EFD7_STRSU]	nucleotide binding; catalytic activity		metabolic process	0.920123	0.553671
G5L103	Transcription elongation factor NusA OS=Streptococcus suis R61 GN=nusA PE=4 SV=1 - [G5L103_STRSU]	RNA binding		metabolic process; cell organization and biogenesis; regulation of biological process	1.01059	0.950361
R4NUJ2	Uncharacterized protein OS=Streptococcus suis TL13 GN=TL13_0962 PE=4 SV=1 - [R4NUJ2_STRSU]				1.22682	0.20276
C6GWA1	Putative peptidase OS=Streptococcus suis (strain BM407) GN=SSUBM407_1650 PE=4 SV=1 - [C6GWA1_STRS4]	catalytic activity	membrane	metabolic process	1.03374	0.838511
G5L2R7	Cell division initiation protein OS=Streptococcus suis R61 GN=SSUR61_2312 PE=4 SV=1 - [G5L2R7_STRSU]		cytoplasm	cell division	0.925578	0.581979
G7S4Z0	Thymidylate kinase OS=Streptococcus suis SS12 GN=tmk PE=3 SV=1 - [G7S4Z0_STRSU]	nucleotide binding; catalytic activity		metabolic process	0.979	0.877629
A4W4N0	tRNA uridine 5-carboxymethylaminomethyl modification enzyme MnmG OS=Streptococcus suis (strain 98HAH33) GN=mnmG PE=3 SV=1 - [MNMG_STRS2]	catalytic activity; nucleotide binding	cytoplasm	metabolic process	1.02648	0.873067
G7RXK3	Protein translocase subunit SecA OS=Streptococcus suis A7 GN=secA PE=3 SV=1 - [G7RXK3_STRSU]	nucleotide binding; catalytic activity; metal ion binding	cytoplasm; membrane	transport	1.00487	0.978598
B9WTW2	Putative uncharacterized protein OS=Streptococcus suis 89/1591 GN=SsuiDRAFT_3671 PE=4 SV=1 - [B9WTW2_STRSU]				0.838903	0.213025
G7S644	Amino acid ABC transporter periplasmic protein OS=Streptococcus suis SS12 GN=SSU12_2002 PE=3 SV=1 - [G7S644_STRSU]	receptor activity; signal transducer activity; transporter activity	membrane	transport	0.93393	0.626245
E8UK42	Amidase OS=Streptococcus suis (strain JS14) GN=SSUJS14_0289 PE=4 SV=1 - [E8UK42_STREJ]	catalytic activity	membrane		1.02924	0.859878
G7S354	Transcriptional regulator OS=Streptococcus suis SS12 GN=SSU12_0301 PE=4 SV=1 - [G7S354_STRSU]				1.11915	0.484067
A4VYU3	DNA-directed RNA polymerase subunit beta OS=Streptococcus suis (strain 98HAH33) GN=rpoB PE=3 SV=1 - [RPOB_STRS2]	DNA binding; catalytic activity		metabolic process	1.07393	0.658398
G7S6W7	16S RNA G1207 methylase RsmC OS=Streptococcus suis SS12 GN=SSU12_1002 PE=4 SV=1 - [G7S6W7_STRSU]	catalytic activity	cytoplasm	metabolic process	1.12332	0.469647
A4VWB3	Predicted sugar phosphatases of the HAD superfamily OS=Streptococcus suis (strain 05ZYH33) GN=SSU05_1436 PE=4 SV=1 - [A4VWB3_STRSY]	catalytic activity		metabolic process	0.908401	0.494692
F4EGH4	Phosphopentomutase OS=Streptococcus suis GN=deoB PE=3 SV=1 - [F4EGH4_STRSU]	metal ion binding; catalytic activity	cytoplasm	metabolic process	1.26702	0.14017
G5L2M8	Putative uncharacterized protein OS=Streptococcus suis R61 GN=SSUR61_2204 PE=4 SV=1 - [G5L2M8_STRSU]		membrane		1.06781	0.684451
G7S3Q1	Lactoylglutathione lyase-related lyase OS=Streptococcus suis SS12 GN=SSU12_0420 PE=4 SV=1 - [G7S3Q1_STRSU]	catalytic activity			1.3299	0.0754424
E8UK21	Putative threonine synthase OS=Streptococcus suis (strain JS14) GN=SSUJS14_0268 PE=4 SV=1 - [E8UK21_STREJ]	catalytic activity	membrane	metabolic process	1.15225	0.377823
G7SN39	Branched-chain alpha-keto acid dehydrogenase subunit E2 OS=Streptococcus suis ST1 GN=SSUST1_1724 PE=3 SV=1 - [G7SN39_STRSU]	catalytic activity	membrane	metabolic process	1.4806	0.0143463
M1U9U0	50S ribosomal protein L27 OS=Streptococcus suis SC070731 GN=rpmA PE=3 SV=1 - [M1U9U0_STRSU]	structural molecule activity	cytoplasm; ribosome	metabolic process	1.19711	0.262494
A4VYN7	UPF0297 protein SSU98_0066 OS=Streptococcus suis (strain 98HAH33) GN=SSU98_0066 PE=3 SV=1 - [Y066_STRS2]				0.856507	0.271971
A4W0V3	Thymidylate synthase OS=Streptococcus suis (strain 98HAH33) GN=thyA PE=3 SV=1 - [TYSY_STRS2]	catalytic activity	cytoplasm	metabolic process	1.00954	0.955508
A4W254	Cytidylate kinase OS=Streptococcus suis (strain 98HAH33) GN=cmk PE=3 SV=1 - [KCY_STRS2]	nucleotide binding; catalytic activity	cytoplasm	metabolic process	0.925733	0.582792
G7S6J7	Replicative DNA helicase OS=Streptococcus suis SS12 GN=SSU12_2075 PE=4 SV=1 - [G7S6J7_STRSU]	nucleotide binding; DNA binding; catalytic activity		metabolic process	1.00318	0.986997
G7S9H8	Alcohol dehydrogenase OS=Streptococcus suis D9 GN=adhP PE=3 SV=1 - [G7S9H8_STRSU]	nucleotide binding; metal ion binding; catalytic activity		metabolic process	1.40078	0.0355344
G7S4K5	SAM-dependent methyltransferase-related tRNA (Uracil-5-)-methyltransferase OS=Streptococcus suis SS12 GN=SSU12_0562 PE=4 SV=1 - [G7S4K5_STRSU]	RNA binding; catalytic activity		metabolic process	1.0536	0.746929
A4W292	Adenine phosphoribosyltransferase OS=Streptococcus suis (strain 98HAH33) GN=apt PE=3 SV=1 - [APT_STRS2]	catalytic activity	cytoplasm	metabolic process	0.8165	0.150841
R4NKL5	50S ribosomal protein L1 OS=Streptococcus suis TL13 GN=rplA PE=3 SV=1 - [R4NKL5_STRSU]		cytoplasm; ribosome		0.947419	0.69973
C6GWQ4	UvrABC system protein A OS=Streptococcus suis (strain BM407) GN=uvrA PE=3 SV=1 - [C6GWQ4_STRS4]	nucleotide binding; DNA binding; catalytic activity; metal ion binding	cytoplasm; membrane	metabolic process; response to stimulus; transport; cell communication	1.17057	0.326854
A4VZ66	Predicted ATPase involved in replication control, Cdc46/Mcm family OS=Streptococcus suis (strain 98HAH33) GN=SSU98_0247 PE=4 SV=1 - [A4VZ66_STRS2]		extracellular		1.17523	0.314764
G7S4T1	Pyruvate/2-oxoglutarate dehydrogenase complex, dihydrolipoamide dehydrogenase (E3) component-related enzyme OS=Streptococcus suis SS12 GN=SSU12_1775 PE=3 SV=1 - [G7S4T1_STRSU]	catalytic activity; nucleotide binding	cytoplasm	cellular homeostasis; regulation of biological process; metabolic process	0.985016	0.911866
A4VZM6	S-ribosylhomocysteine lyase OS=Streptococcus suis (strain 98HAH33) GN=luxS PE=3 SV=2 - [LUXS_STRS2]	catalytic activity; metal ion binding		metabolic process	1.02859	0.862979
D5AIA8	Prephenate dehydrogenase OS=Streptococcus suis (strain GZ1) GN=SSGZ1_1116 PE=4 SV=1 - [D5AIA8_STRGZ]	nucleotide binding; catalytic activity		metabolic process	0.95354	0.733724
M1TH20	50S ribosomal protein L17 OS=Streptococcus suis SC070731 GN=NJAUSS_0106 PE=3 SV=1 - [M1TH20_STRSU]	structural molecule activity	cytoplasm; ribosome	metabolic process	1.17509	0.315114
A4VTM0	Uncharacterized protein conserved in bacteria OS=Streptococcus suis (strain 05ZYH33) GN=SSU05_0493 PE=4 SV=1 - [A4VTM0_STRSY]				0.991802	0.950426
A4W251	50S ribosomal protein L20 OS=Streptococcus suis (strain 98HAH33) GN=rplT PE=3 SV=1 - [RL20_STRS2]	RNA binding; structural molecule activity	cytoplasm; ribosome	metabolic process	1.07849	0.639367
A4VZL1	UPF0176 protein SSU98_0392 OS=Streptococcus suis (strain 98HAH33) GN=SSU98_0392 PE=3 SV=1 - [Y392_STRS2]				1.16772	0.334442
G7S492	Putative uncharacterized protein OS=Streptococcus suis SS12 GN=SSU12_1667 PE=4 SV=1 - [G7S492_STRSU]				0.898955	0.449209
G7S2C4	ABC-type multidrug transport system, ATPase component OS=Streptococcus suis SS12 GN=SSU12_0178 PE=3 SV=1 - [G7S2C4_STRSU]	nucleotide binding; catalytic activity		metabolic process	1.04284	0.795991
G7S4S8	Lipoate-protein ligase OS=Streptococcus suis SS12 GN=SSU12_1772 PE=4 SV=1 - [G7S4S8_STRSU]	nucleotide binding; catalytic activity	cytoplasm	metabolic process	0.878101	0.356219
G7S5T3	Cell envelope proteinase OS=Streptococcus suis SS12 GN=prtS PE=3 SV=1 - [G7S5T3_STRSU]	catalytic activity	extracellular; membrane	metabolic process	0.893131	0.422172
G5L1T7	CDP-diacylglycerol--glycerol-3-phosphate 3-phosphatidyltransferase OS=Streptococcus suis R61 GN=SSUR61_1558 PE=3 SV=1 - [G5L1T7_STRSU]	catalytic activity	membrane	metabolic process	0.954773	0.740612
A4VY06	Uncharacterized protein OS=Streptococcus suis (strain 05ZYH33) GN=SSU05_2029 PE=4 SV=1 - [A4VY06_STRSY]		membrane		0.778951	0.0768537
G7SN24	Elongation factor P OS=Streptococcus suis ST1 GN=efp PE=3 SV=1 - [G7SN24_STRSU]	RNA binding	cytoplasm	metabolic process	1.13213	0.440204
G7S232	Dephospho-CoA kinase OS=Streptococcus suis SS12 GN=coaE PE=3 SV=1 - [G7S232_STRSU]	nucleotide binding; catalytic activity	cytoplasm	metabolic process	0.939119	0.65425
G7S6P3	Dihydroorotase OS=Streptococcus suis SS12 GN=pyrC PE=3 SV=1 - [G7S6P3_STRSU]	catalytic activity; metal ion binding		metabolic process	1.12588	0.460964
M1VNY7	Glycosyltransferase OS=Streptococcus suis GN=cps17M PE=4 SV=1 - [M1VNY7_STRSU]	catalytic activity		metabolic process	0.900268	0.455413
G7RXF9	Uncharacterized protein OS=Streptococcus suis A7 GN=SSUA7_0379 PE=4 SV=1 - [G7RXF9_STRSU]		membrane		1.00022	0.998046
G5L139	Kinase: Transcriptional regulator/sugar OS=Streptococcus suis R61 GN=SSUR61_1820 PE=4 SV=1 - [G5L139_STRSU]	catalytic activity		metabolic process	1.31236	0.0901116
A4W460	Ferredoxin--NADP reductase OS=Streptococcus suis (strain 98HAH33) GN=SSU98_1991 PE=3 SV=2 - [FENR_STRS2]	catalytic activity; nucleotide binding		metabolic process	1.05247	0.752002
G7S467	FAD dependent oxidoreductase OS=Streptococcus suis SS12 GN=SSU12_0505 PE=4 SV=1 - [G7S467_STRSU]	catalytic activity		metabolic process	0.993575	0.960485
G5L100	tRNA (guanine-N(7)-)-methyltransferase OS=Streptococcus suis R61 GN=trmB PE=3 SV=1 - [G5L100_STRSU]	catalytic activity		metabolic process	0.979943	0.882999
C6GT07	Putative membrane protein OS=Streptococcus suis (strain SC84) GN=SSUSC84_1980 PE=4 SV=1 - [C6GT07_STRSX]				1.03917	0.813016
R4NVJ5	Non-specific DNA-binding protein Dps / Iron-binding ferritin-like antioxidant protein / Ferroxidase OS=Streptococcus suis TL13 GN=dps PE=3 SV=1 - [R4NVJ5_STRSU]	DNA binding			0.891514	0.414804
G7S3J4	Metal-dependent hydrolase OS=Streptococcus suis SS12 GN=SSU12_0362 PE=4 SV=1 - [G7S3J4_STRSU]	catalytic activity			0.932195	0.616967
A4W1V8	ATP synthase gamma chain OS=Streptococcus suis (strain 98HAH33) GN=atpG PE=3 SV=1 - [ATPG_STRS2]	nucleotide binding; catalytic activity; transporter activity	membrane	metabolic process; transport	1.05518	0.739851
A4VTU4	Cps2D OS=Streptococcus suis (strain 05ZYH33) GN=SSU05_0567 PE=4 SV=1 - [A4VTU4_STRSY]	catalytic activity; metal ion binding		metabolic process	1.0122	0.942409
C6GY13	Glycosyl hydrolase family protein OS=Streptococcus suis (strain BM407) GN=SSUBM407_0788 PE=4 SV=1 - [C6GY13_STRS4]	catalytic activity	membrane	metabolic process	1.03297	0.842149
A4VWI6	Septation ring formation regulator EzrA OS=Streptococcus suis (strain 05ZYH33) GN=ezrA PE=3 SV=1 - [EZRA_STRSY]		membrane; cytoplasm; cytoskeleton	cell division; cell organization and biogenesis	0.956492	0.750233
A4W313	Bifunctional protein GlmU OS=Streptococcus suis (strain 98HAH33) GN=glmU PE=3 SV=2 - [GLMU_STRS2]	metal ion binding; catalytic activity	cytoplasm	cell organization and biogenesis; metabolic process; regulation of biological process	0.98274	0.898916
G7S1E9	GTP-binding protein OS=Streptococcus suis SS12 GN=SSU12_0006 PE=4 SV=1 - [G7S1E9_STRSU]	nucleotide binding; transporter activity	membrane	transport	0.994254	0.96433
G7S2R4	Dihydroorotate dehydrogenase OS=Streptococcus suis SS12 GN=pyrD PE=3 SV=1 - [G7S2R4_STRSU]	catalytic activity	cytoplasm	metabolic process	0.980053	0.883625
C7EN54	ATPase involved in DNA repair OS=Streptococcus suis GN=SSUST3_0492 PE=4 SV=1 - [C7EN54_STRSU]				0.909421	0.499715
R4NHI2	30S ribosomal protein S14 type Z OS=Streptococcus suis TL13 GN=rpsN PE=3 SV=1 - [R4NHI2_STRSU]		cytoplasm; ribosome		1.14717	0.392946
A4W3H4	Ribosomal RNA small subunit methyltransferase H OS=Streptococcus suis (strain 98HAH33) GN=rsmH PE=3 SV=2 - [RSMH_STRS2]	catalytic activity	cytoplasm	metabolic process	0.998595	0.988881
F4EHF6	Putative oligopeptidase OS=Streptococcus suis GN=SSUST3_1510 PE=4 SV=1 - [F4EHF6_STRSU]	catalytic activity		metabolic process	0.756244	0.0478956
A4VYP9	30S ribosomal protein S3 OS=Streptococcus suis (strain 98HAH33) GN=rpsC PE=3 SV=1 - [RS3_STRS2]	RNA binding; structural molecule activity	cytoplasm; ribosome	metabolic process	1.0886	0.598304
A4VZG4	Aspartyl/glutamyl-tRNA(Asn/Gln) amidotransferase subunit C OS=Streptococcus suis (strain 98HAH33) GN=gatC PE=3 SV=1 - [GATC_STRS2]	nucleotide binding; catalytic activity		metabolic process; regulation of biological process	0.949751	0.712641
M1UQI9	Translation initiation factor IF-2 OS=Streptococcus suis SC070731 GN=infB PE=3 SV=1 - [M1UQI9_STRSU]	nucleotide binding; RNA binding; catalytic activity	cytoplasm	metabolic process; cell communication; regulation of biological process; response to stimulus	1.06408	0.700579
G7S4Y8	Putative uncharacterized protein OS=Streptococcus suis SS12 GN=SSU12_0614 PE=4 SV=1 - [G7S4Y8_STRSU]				0.990087	0.940691
G7SIZ9	SIR2 family protein OS=Streptococcus suis ST1 GN=SSUST1_0306 PE=4 SV=1 - [G7SIZ9_STRSU]	metal ion binding; nucleotide binding	membrane	metabolic process	0.787668	0.0909128
G7S1L3	Putative uncharacterized protein OS=Streptococcus suis SS12 GN=SSU12_1182 PE=4 SV=1 - [G7S1L3_STRSU]				0.929399	0.602098
G5KZF5	Putative uncharacterized protein OS=Streptococcus suis R61 GN=SSUR61_1022 PE=4 SV=1 - [G5KZF5_STRSU]				1.08621	0.607853
A4VYI0	Peptidyl-tRNA hydrolase OS=Streptococcus suis (strain 98HAH33) GN=pth PE=3 SV=1 - [PTH_STRS2]	catalytic activity	cytoplasm		1.16614	0.338683
G7S2D8	Methyl-accepting chemotaxis protein OS=Streptococcus suis SS12 GN=SSU12_0192 PE=4 SV=1 - [G7S2D8_STRSU]				0.918076	0.543184
G7RYU4	Uncharacterized protein OS=Streptococcus suis A7 GN=SSUA7_0626 PE=4 SV=1 - [G7RYU4_STRSU]		membrane		1.06803	0.683492
G7S2M8	Putative repressor protein OS=Streptococcus suis SS12 GN=SSU12_0201 PE=4 SV=1 - [G7S2M8_STRSU]				0.894126	0.426733
A4W3F7	GTPase Der OS=Streptococcus suis (strain 98HAH33) GN=der PE=3 SV=1 - [DER_STRS2]	nucleotide binding; catalytic activity; transporter activity	membrane	metabolic process; cell communication; regulation of biological process; response to stimulus; transport	0.964745	0.796696
M1UF57	Peptide ABC transporter permease OS=Streptococcus suis SC070731 GN=NJAUSS_0485 PE=4 SV=1 - [M1UF57_STRSU]		membrane		1.02349	0.887459
G7S6L0	Energy-coupling factor transporter transmembrane protein EcfT OS=Streptococcus suis SS12 GN=ecfT PE=3 SV=1 - [G7S6L0_STRSU]	transporter activity	membrane	transport	1.14967	0.385464
G7S2K0	Phosphotransferase system IIC component, glucose/maltose/N-acetylglucosamine-specific OS=Streptococcus suis SS12 GN=SSU12_1376 PE=4 SV=1 - [G7S2K0_STRSU]	transporter activity; catalytic activity	membrane	transport; metabolic process	0.838126	0.21063
A4VYU1	Tyrosine--tRNA ligase OS=Streptococcus suis (strain 98HAH33) GN=tyrS PE=3 SV=1 - [SYY_STRS2]	nucleotide binding; RNA binding; catalytic activity	cytoplasm	metabolic process	0.926128	0.584859
R4NUR7	Uncharacterized protein OS=Streptococcus suis TL13 GN=TL13_0262 PE=4 SV=1 - [R4NUR7_STRSU]				0.945352	0.688333
G5L072	N5-carboxyaminoimidazole ribonucleotide mutase OS=Streptococcus suis R61 GN=SSUR61_1400 PE=3 SV=1 - [G5L072_STRSU]	catalytic activity	membrane	metabolic process	1.15359	0.373909
A4VYQ3	50S ribosomal protein L14 OS=Streptococcus suis (strain 98HAH33) GN=rplN PE=3 SV=1 - [RL14_STRS2]	RNA binding; structural molecule activity	cytoplasm; ribosome	metabolic process	0.97373	0.847648
G7S5B0	Pseudouridine synthase OS=Streptococcus suis SS12 GN=SSU12_1876 PE=3 SV=1 - [G7S5B0_STRSU]	RNA binding; catalytic activity		metabolic process	0.964398	0.794736
G7S566	Metal-sulfur cluster biosynthetic protein OS=Streptococcus suis SS12 GN=SSU12_1830 PE=4 SV=1 - [G7S566_STRSU]				0.799119	0.112148
A4VYR0	50S ribosomal protein L30 OS=Streptococcus suis (strain 98HAH33) GN=rpmD PE=3 SV=1 - [RL30_STRS2]	structural molecule activity	cytoplasm; ribosome	metabolic process	0.856923	0.273471
A4VTM4	Bifunctional protein FolD OS=Streptococcus suis (strain 05ZYH33) GN=folD PE=3 SV=1 - [FOLD_STRSY]	nucleotide binding; catalytic activity		metabolic process	0.829892	0.186301
G7S3K9	Membrane carboxypeptidase (Penicillin-binding protein) OS=Streptococcus suis SS12 GN=SSU12_0377 PE=4 SV=1 - [G7S3K9_STRSU]	catalytic activity		metabolic process; response to stimulus	1.03411	0.836764
A4W453	30S ribosomal protein S2 OS=Streptococcus suis (strain 98HAH33) GN=rpsB PE=3 SV=2 - [RS2_STRS2]	structural molecule activity	cytoplasm; ribosome	metabolic process	1.02477	0.881279
A4VZM2	Cell cycle protein GpsB OS=Streptococcus suis (strain 98HAH33) GN=gpsB PE=3 SV=1 - [GPSB_STRS2]		cytoplasm	cell organization and biogenesis; regulation of biological process; cell division	0.631018	0.00112386
R4NHU3	Transcriptional regulator glutamine synthetase repressor OS=Streptococcus suis TL13 GN=TL13_0204 PE=4 SV=1 - [R4NHU3_STRSU]				1.00846	0.960844
B9WSR6	Cell envelope-related transcriptional attenuator OS=Streptococcus suis 89/1591 GN=SsuiDRAFT_3957 PE=4 SV=1 - [B9WSR6_STRSU]				0.966197	0.804912
G7SNF1	Putative uncharacterized protein OS=Streptococcus suis ST1 GN=SSUST1_0265 PE=3 SV=1 - [G7SNF1_STRSU]	transporter activity	membrane	transport	0.766592	0.0598003
A4W0P5	Probable tRNA sulfurtransferase OS=Streptococcus suis (strain 98HAH33) GN=thiI PE=3 SV=1 - [THII_STRS2]	RNA binding; nucleotide binding; catalytic activity	cytoplasm	metabolic process	1.00854	0.960425
J7KN80	Uncharacterized protein OS=Streptococcus suis S735 GN=YYK_05715 PE=4 SV=1 - [J7KN80_STRSU]				1.03228	0.845404
A4VYP4	50S ribosomal protein L4 OS=Streptococcus suis (strain 98HAH33) GN=rplD PE=3 SV=1 - [RL4_STRS2]	RNA binding; structural molecule activity	cytoplasm; ribosome	metabolic process	1.10403	0.538676
G7S530	Transcriptional regulator OS=Streptococcus suis SS12 GN=SSU12_0660 PE=4 SV=1 - [G7S530_STRSU]				1.07497	0.65405
A4W369	2,3-bisphosphoglycerate-dependent phosphoglycerate mutase OS=Streptococcus suis (strain 98HAH33) GN=gpmA PE=3 SV=1 - [GPMA_STRS2]	catalytic activity		metabolic process	0.873705	0.338036
G7S2G4	Type I restriction-modification system M protein OS=Streptococcus suis SS12 GN=SSU12_1340 PE=4 SV=1 - [G7S2G4_STRSU]	DNA binding; catalytic activity		metabolic process; regulation of biological process	0.922055	0.563641
G7S337	Heat-inducible transcription repressor hrcA OS=Streptococcus suis SS12 GN=hrcA PE=3 SV=1 - [G7S337_STRSU]	DNA binding		metabolic process; regulation of biological process; response to stimulus	0.97942	0.880021
R4NNW5	Maltose operon transcriptional repressor MalR, LacI family OS=Streptococcus suis TL13 GN=malR PE=4 SV=1 - [R4NNW5_STRSU]				0.920928	0.557817
R4NXW9	Glyoxalase family protein OS=Streptococcus suis TL13 GN=TL13_1468 PE=4 SV=1 - [R4NXW9_STRSU]				1.12969	0.448234
F4EDY2	Ribonuclease P protein component OS=Streptococcus suis GN=rnpA PE=3 SV=1 - [F4EDY2_STRSU]	RNA binding; catalytic activity		metabolic process	1.0695	0.677206
G7S4N8	Putative uncharacterized protein OS=Streptococcus suis SS12 GN=SSU12_1732 PE=4 SV=1 - [G7S4N8_STRSU]				1.01304	0.938309
G5KYV0	ABC-type polar amino acid transport system, ATPase component OS=Streptococcus suis R61 GN=SSUR61_0076 PE=3 SV=1 - [G5KYV0_STRSU]	nucleotide binding; catalytic activity		metabolic process	1.0279	0.86629
A4W3N6	Holo-[acyl-carrier-protein] synthase OS=Streptococcus suis (strain 98HAH33) GN=acpS PE=3 SV=1 - [ACPS_STRS2]	metal ion binding; catalytic activity	cytoplasm	metabolic process	1.01211	0.94284
G7S5D0	Oligoendopeptidase F OS=Streptococcus suis SS12 GN=SSU12_0680 PE=4 SV=1 - [G7S5D0_STRSU]	catalytic activity; metal ion binding		metabolic process	0.901484	0.461197
R4NWE6	Iron-sulfur cluster assembly ATPase protein SufC OS=Streptococcus suis TL13 GN=sufC PE=4 SV=1 - [R4NWE6_STRSU]				0.999233	0.992483
G7S5Z5	Transcriptional regulator OS=Streptococcus suis SS12 GN=SSU12_0817 PE=4 SV=1 - [G7S5Z5_STRSU]	DNA binding		metabolic process; regulation of biological process	0.941716	0.668399
R4NWT2	PurR: transcription regulator associated with purine metabolism OS=Streptococcus suis TL13 GN=purR PE=4 SV=1 - [R4NWT2_STRSU]				0.896659	0.438454
E8UL93	Dihydroneopterin aldolase OS=Streptococcus suis (strain JS14) GN=SSUJS14_1114 PE=4 SV=1 - [E8UL93_STREJ]	catalytic activity		metabolic process	0.888422	0.400897
G7S2K4	Putative uncharacterized protein OS=Streptococcus suis SS12 GN=SSU12_1380 PE=4 SV=1 - [G7S2K4_STRSU]	protein binding			0.999098	0.991721
G7S375	HAD superfamily hydrolase OS=Streptococcus suis SS12 GN=SSU12_0323 PE=4 SV=1 - [G7S375_STRSU]	catalytic activity		metabolic process	1.12325	0.469912
A4W271	ABC-type polysaccharide/polyol phosphate export system, permease component OS=Streptococcus suis (strain 98HAH33) GN=SSU98_1302 PE=4 SV=1 - [A4W271_STRS2]	nucleotide binding; catalytic activity; transporter activity	membrane	transport	0.814554	0.146105
G7S2P5	Glycosidase OS=Streptococcus suis SS12 GN=SSU12_0218 PE=4 SV=1 - [G7S2P5_STRSU]	catalytic activity	cytoplasm	metabolic process	1.03436	0.835611
G7S3U7	Geranylgeranyl pyrophosphate synthase OS=Streptococcus suis SS12 GN=SSU12_1601 PE=3 SV=1 - [G7S3U7_STRSU]	catalytic activity		metabolic process	0.805487	0.125393
G7S3L8	Guanylate kinase OS=Streptococcus suis SS12 GN=gmk PE=3 SV=1 - [G7S3L8_STRSU]	nucleotide binding; catalytic activity; protein binding	cytoplasm	metabolic process	0.88076	0.367468
G7S391	Putative uncharacterized protein OS=Streptococcus suis SS12 GN=SSU12_0339 PE=4 SV=1 - [G7S391_STRSU]	metal ion binding			1.0316	0.848645
G7S378	Aminotransferase AlaT OS=Streptococcus suis SS12 GN=SSU12_0326 PE=4 SV=1 - [G7S378_STRSU]	catalytic activity		metabolic process	1.03631	0.826431
G7RZR7	Putative cytoplasmic protein OS=Streptococcus suis A7 GN=SSUA7_0809 PE=4 SV=1 - [G7RZR7_STRSU]			metabolic process; regulation of biological process	0.843923	0.228925
G7S1M7	Glucose-1-phosphate thymidylyltransferase OS=Streptococcus suis SS12 GN=SSU12_1198 PE=3 SV=1 - [G7S1M7_STRSU]	catalytic activity; metal ion binding		metabolic process	0.917892	0.542248
M1UAH5	O-methyltransferase OS=Streptococcus suis SC070731 GN=NJAUSS_1146 PE=4 SV=1 - [M1UAH5_STRSU]	catalytic activity		metabolic process	0.955529	0.744837
R4NVK7	Pseudouridine synthase OS=Streptococcus suis TL13 GN=rluB PE=3 SV=1 - [R4NVK7_STRSU]				1.04186	0.800505
A4W418	Peptide deformylase OS=Streptococcus suis (strain 98HAH33) GN=def PE=3 SV=1 - [DEF_STRS2]	metal ion binding; catalytic activity		metabolic process	0.966131	0.804539
G7S3N1	Cysteine synthase OS=Streptococcus suis SS12 GN=cysM PE=3 SV=1 - [G7S3N1_STRSU]	catalytic activity		metabolic process	1.1033	0.541415
G7S4D0	Putative uncharacterized protein OS=Streptococcus suis SS12 GN=SSU12_1705 PE=4 SV=1 - [G7S4D0_STRSU]				1.10025	0.552945
A4VYQ6	30S ribosomal protein S8 OS=Streptococcus suis (strain 98HAH33) GN=rpsH PE=3 SV=1 - [RS8_STRS2]	RNA binding; structural molecule activity	cytoplasm; ribosome	metabolic process	1.10163	0.547717
G7S6W4	Cytidine deaminase OS=Streptococcus suis SS12 GN=SSU12_0999 PE=4 SV=1 - [G7S6W4_STRSU]	catalytic activity; metal ion binding		metabolic process	0.833142	0.195671
F4EBZ2	Peptide ABC transporter ATPase OS=Streptococcus suis GN=SSUST3_0250 PE=3 SV=1 - [F4EBZ2_STRSU]	nucleotide binding; catalytic activity		metabolic process	0.848114	0.242756
G5L040	tRNA(Ile)-lysidine synthase OS=Streptococcus suis R61 GN=tilS PE=3 SV=1 - [G5L040_STRSU]	nucleotide binding; catalytic activity	cytoplasm	metabolic process	1.08683	0.605347
G7SHC0	RNA polymerase sigma factor OS=Streptococcus suis D12 GN=SSUD12_1410 PE=3 SV=1 - [G7SHC0_STRSU]	DNA binding		metabolic process; regulation of biological process	0.888534	0.4014
A4W0G0	Formate--tetrahydrofolate ligase OS=Streptococcus suis (strain 98HAH33) GN=fhs PE=3 SV=1 - [FTHS_STRS2]	nucleotide binding; catalytic activity		metabolic process	0.949778	0.712791
A4VTS0	6-phosphofructokinase OS=Streptococcus suis (strain 05ZYH33) GN=pfkA PE=3 SV=1 - [K6PF_STRSY]	nucleotide binding; catalytic activity; metal ion binding	cytoplasm; cytosol	metabolic process	0.981027	0.889166
Q5IRB6	Two component transcriptional regulator, winged helix family OS=Streptococcus suis GN=resR PE=4 SV=1 - [Q5IRB6_STRSU]	signal transducer activity; DNA binding		cell communication; regulation of biological process; response to stimulus; metabolic process	0.927127	0.590108
G7S9P5	Methionine aminopeptidase OS=Streptococcus suis D9 GN=SSUD9_1625 PE=4 SV=1 - [G7S9P5_STRSU]	catalytic activity		metabolic process	0.914281	0.523945
A4W3A3	NH(3)-dependent NAD(+) synthetase OS=Streptococcus suis (strain 98HAH33) GN=nadE PE=3 SV=1 - [NADE_STRS2]	nucleotide binding; catalytic activity		metabolic process	0.963025	0.786978
G5L2P9	Putative uncharacterized protein OS=Streptococcus suis R61 GN=SSUR61_2294 PE=4 SV=1 - [G5L2P9_STRSU]				1.19729	0.262094
G7S2J9	Beta-glucosidase/6-phospho-beta-glucosidase/beta-galactosidase OS=Streptococcus suis SS12 GN=SSU12_1375 PE=3 SV=1 - [G7S2J9_STRSU]	catalytic activity		metabolic process	0.862247	0.293102
G7S4C2	Major membrane immunogen, membrane-anchored lipoprotein OS=Streptococcus suis SS12 GN=SSU12_1697 PE=4 SV=1 - [G7S4C2_STRSU]	nucleotide binding	membrane		0.643938	0.0018438
G7SDQ3	dTDP-glucose 4,6-dehydratase OS=Streptococcus suis D12 GN=SSUD12_0656 PE=3 SV=1 - [G7SDQ3_STRSU]	nucleotide binding; catalytic activity	membrane	metabolic process	0.878897	0.359568
G7SB23	ABC-type dipeptide/oligopeptide/nickel transport system, ATPase component OS=Streptococcus suis D9 GN=SSUD9_1894 PE=3 SV=1 - [G7SB23_STRSU]	nucleotide binding; transporter activity; catalytic activity	membrane	metabolic process; transport	1.05584	0.736882
G7S2E2	Transcriptional regulator OS=Streptococcus suis SS12 GN=SSU12_0196 PE=4 SV=1 - [G7S2E2_STRSU]				0.881125	0.369027
F4EF06	Putative uncharacterized protein OS=Streptococcus suis GN=SSUST3_0850 PE=4 SV=1 - [F4EF06_STRSU]	transporter activity		transport	0.891709	0.415692
G7S5G9	Putative 30S ribosomal protein S1 OS=Streptococcus suis SS12 GN=rpsA PE=4 SV=1 - [G7S5G9_STRSU]	RNA binding; structural molecule activity	cytoplasm; ribosome	metabolic process	1.052	0.754147
G7SKP1	Septum formation initiator OS=Streptococcus suis ST1 GN=SSUST1_0011 PE=4 SV=1 - [G7SKP1_STRSU]		membrane		0.882756	0.376034
G7S2G9	Putative uncharacterized protein OS=Streptococcus suis SS12 GN=SSU12_1345 PE=4 SV=1 - [G7S2G9_STRSU]				0.90179	0.462656
G7S4F1	Glutamine--fructose-6-phosphate aminotransferase [isomerizing] OS=Streptococcus suis SS12 GN=glmS PE=3 SV=1 - [G7S4F1_STRSU]	catalytic activity	cytoplasm	metabolic process	0.962163	0.782119
C6GVQ1	Uncharacterized protein OS=Streptococcus suis (strain BM407) GN=SSUBM407_1537 PE=4 SV=1 - [C6GVQ1_STRS4]				0.969356	0.822813
D5AH99	Putative uncharacterized protein OS=Streptococcus suis (strain GZ1) GN=SSGZ1_0757 PE=4 SV=1 - [D5AH99_STRGZ]				1.0856	0.610332
G7S5K4	Dihydroxyacetone kinase OS=Streptococcus suis SS12 GN=SSU12_1893 PE=4 SV=1 - [G7S5K4_STRSU]	catalytic activity		metabolic process	0.949351	0.710424
G5KZZ1	4-alpha-glucanotransferase OS=Streptococcus suis R61 GN=SSUR61_1318 PE=4 SV=1 - [G5KZZ1_STRSU]	catalytic activity		metabolic process	0.792284	0.099083
A4W2X9	ATP-dependent Clp protease proteolytic subunit OS=Streptococcus suis (strain 98HAH33) GN=clpP PE=3 SV=1 - [CLPP_STRS2]	nucleotide binding; catalytic activity	cytoplasm	metabolic process	0.80897	0.133088
G7S5L4	Glutathione biosynthesis bifunctional protein GshAB OS=Streptococcus suis SS12 GN=gshAB PE=3 SV=1 - [G7S5L4_STRSU]	nucleotide binding; metal ion binding; catalytic activity		metabolic process	1.03497	0.832707
G7S3D4	Cystathionine gamma-synthase OS=Streptococcus suis SS12 GN=SSU12_1506 PE=3 SV=1 - [G7S3D4_STRSU]	catalytic activity		metabolic process	0.890905	0.412049
A4VYH0	Predicted transcriptional regulator OS=Streptococcus suis (strain 05ZYH33) GN=SSU05_2193 PE=4 SV=1 - [A4VYH0_STRSY]	DNA binding			1.16341	0.346141
A4VYP1	30S ribosomal protein S10 OS=Streptococcus suis (strain 98HAH33) GN=rpsJ PE=3 SV=1 - [RS10_STRS2]	RNA binding; structural molecule activity	cytoplasm; ribosome	metabolic process	1.19626	0.264381
G7S2F3	Putative uncharacterized protein OS=Streptococcus suis SS12 GN=SSU12_1329 PE=4 SV=1 - [G7S2F3_STRSU]	catalytic activity		metabolic process	0.924479	0.576236
G7S3A8	Putative uncharacterized protein OS=Streptococcus suis SS12 GN=SSU12_0356 PE=4 SV=1 - [G7S3A8_STRSU]				0.904165	0.474056
A4W0Q9	Bifunctional protein PyrR OS=Streptococcus suis (strain 98HAH33) GN=pyrR PE=3 SV=1 - [PYRR_STRS2]	RNA binding; catalytic activity		metabolic process; regulation of biological process	1.00151	0.99532
G5L2R6	S4-like domain-containing protein OS=Streptococcus suis R61 GN=SSUR61_2311 PE=4 SV=1 - [G5L2R6_STRSU]	RNA binding			1.06184	0.710356
G7S1S1	Putative DNA-binding protein OS=Streptococcus suis SS12 GN=SSU12_0050 PE=4 SV=1 - [G7S1S1_STRSU]	DNA binding			0.899067	0.449737
G7SMZ4	Arginine repressor OS=Streptococcus suis ST1 GN=argR PE=3 SV=1 - [G7SMZ4_STRSU]	DNA binding	cytoplasm	metabolic process; regulation of biological process; cell organization and biogenesis	0.87146	0.328946
G5KZB2	Prophage protein OS=Streptococcus suis R61 GN=SSUR61_0978 PE=4 SV=1 - [G5KZB2_STRSU]				0.802179	0.118381
A4W408	Uncharacterized protein OS=Streptococcus suis (strain 98HAH33) GN=SSU98_1939 PE=4 SV=1 - [A4W408_STRS2]	catalytic activity		metabolic process	0.926483	0.586722
G7RYX3	Glucose-6-phosphate isomerase OS=Streptococcus suis A7 GN=pgi PE=3 SV=1 - [G7RYX3_STRSU]	catalytic activity	cytoplasm; membrane	metabolic process	1.02067	0.901068
A4VVT7	UPF0342 protein SSU05_1260 OS=Streptococcus suis (strain 05ZYH33) GN=SSU05_1260 PE=3 SV=1 - [Y1260_STRSY]				0.966424	0.806193
R4NJI0	Glutamate transport ATP-binding protein OS=Streptococcus suis TL13 GN=glnQ PE=4 SV=1 - [R4NJI0_STRSU]	nucleotide binding			1.04363	0.792331
G7S428	Collagenase-like protease OS=Streptococcus suis SS12 GN=SSU12_0466 PE=4 SV=1 - [G7S428_STRSU]	catalytic activity		metabolic process	1.02101	0.899443
G7RZL0	Chloride channel protein EriC OS=Streptococcus suis A7 GN=SSUA7_0751 PE=4 SV=1 - [G7RZL0_STRSU]	transporter activity	membrane	transport	0.917571	0.540609
M1UBD5	SAM-dependent methyltransferase OS=Streptococcus suis SC070731 GN=NJAUSS_1544 PE=4 SV=1 - [M1UBD5_STRSU]	catalytic activity		metabolic process	0.894452	0.428235
G5KYN1	Capsular polysaccharide biosynthesis protein OS=Streptococcus suis R61 GN=SSUR61_0758 PE=4 SV=1 - [G5KYN1_STRSU]			metabolic process	0.883274	0.378272
G7S266	Diadenosine tetraphosphate (Ap4A) hydrolas-like HIT family hydrolase OS=Streptococcus suis SS12 GN=SSU12_0118 PE=4 SV=1 - [G7S266_STRSU]	catalytic activity		metabolic process	0.937645	0.646259
G7S550	Adapter protein MecA OS=Streptococcus suis SS12 GN=mecA PE=3 SV=1 - [G7S550_STRSU]	protein binding			0.817086	0.152289
M1VE47	Fic/DOC family protein OS=Streptococcus suis GN=cps33F PE=4 SV=1 - [M1VE47_STRSU]				2.60627	2.21051e-09
G7S465	Pyruvate kinase OS=Streptococcus suis SS12 GN=SSU12_0503 PE=3 SV=1 - [G7S465_STRSU]	metal ion binding; catalytic activity		metabolic process	0.861653	0.290874
F4EFJ6	Putative uncharacterized protein OS=Streptococcus suis GN=SSUST3_1057 PE=4 SV=1 - [F4EFJ6_STRSU]				1.00899	0.958201
G7S5E2	Cobalt ABC transporter ATP-binding protein OS=Streptococcus suis SS12 GN=SSU12_0692 PE=3 SV=1 - [G7S5E2_STRSU]	nucleotide binding; catalytic activity		metabolic process	1.40815	0.0327605
B9WY71	Phosphodiesterase, MJ0936 family OS=Streptococcus suis 89/1591 GN=SsuiDRAFT_2163 PE=4 SV=1 - [B9WY71_STRSU]	catalytic activity			1.25598	0.155472
A4VXD5	Transcriptional regulator OS=Streptococcus suis (strain 05ZYH33) GN=SSU05_1808 PE=4 SV=1 - [A4VXD5_STRSY]	DNA binding		metabolic process; regulation of biological process	1.3073	0.0947791
G7S2H4	Dipeptidase PepV OS=Streptococcus suis SS12 GN=SSU12_1350 PE=4 SV=1 - [G7S2H4_STRSU]	catalytic activity; metal ion binding		metabolic process	1.00822	0.962031
G5L2N5	L-fucose isomerase OS=Streptococcus suis R61 GN=fucI PE=3 SV=1 - [G5L2N5_STRSU]	catalytic activity; metal ion binding	cytoplasm; membrane	metabolic process	1.85989	0.000107314
G7RWN4	DNA polymerase III subunits gamma and tau OS=Streptococcus suis A7 GN=SSUA7_1459 PE=4 SV=1 - [G7RWN4_STRSU]	nucleotide binding; DNA binding; catalytic activity		metabolic process; response to stimulus	1.04217	0.799093
A4VZB1	UPF0210 protein SSU98_0292 OS=Streptococcus suis (strain 98HAH33) GN=SSU98_0292 PE=3 SV=1 - [Y292_STRS2]				0.936042	0.637602
G7S5M2	Transcriptional regulator OS=Streptococcus suis SS12 GN=SSU12_1911 PE=4 SV=1 - [G7S5M2_STRSU]	catalytic activity		metabolic process	1.19784	0.260861
G7S4Q3	Phosphatase/phosphohexomutase OS=Streptococcus suis SS12 GN=SSU12_1747 PE=4 SV=1 - [G7S4Q3_STRSU]	catalytic activity		metabolic process	0.976419	0.862945
A4VYX5	30S ribosomal protein S7 OS=Streptococcus suis (strain 98HAH33) GN=rpsG PE=3 SV=1 - [RS7_STRS2]	RNA binding; structural molecule activity	cytoplasm; ribosome	metabolic process	1.06082	0.71483
G7S1Z2	D-alanine--D-alanine ligase OS=Streptococcus suis SS12 GN=ddlA PE=3 SV=1 - [G7S1Z2_STRSU]	nucleotide binding; metal ion binding; catalytic activity	cytoplasm	cell organization and biogenesis; regulation of biological process; metabolic process	0.968654	0.81883
G7S8K2	Putative uncharacterized protein OS=Streptococcus suis D9 GN=SSUD9_0120 PE=4 SV=1 - [G7S8K2_STRSU]				0.993468	0.959878
A4VYN2	Holliday junction ATP-dependent DNA helicase RuvA OS=Streptococcus suis (strain 98HAH33) GN=ruvA PE=3 SV=1 - [RUVA_STRS2]	nucleotide binding; DNA binding; catalytic activity		metabolic process; response to stimulus; cell communication	0.897679	0.44322
F4EDN8	Putative ribosome biogenesis GTPase RsgA OS=Streptococcus suis GN=rsgA PE=3 SV=1 - [F4EDN8_STRSU]	nucleotide binding; catalytic activity; metal ion binding		metabolic process	0.989357	0.936544
A4W377	Uncharacterized protein conserved in bacteria OS=Streptococcus suis (strain 98HAH33) GN=SSU98_1658 PE=4 SV=1 - [A4W377_STRS2]				0.93086	0.609853
A4W027	Glutamate 5-kinase OS=Streptococcus suis (strain 98HAH33) GN=proB PE=3 SV=1 - [PROB_STRS2]	nucleotide binding; RNA binding; catalytic activity	cytoplasm	metabolic process	1.22802	0.20061
G7RWA8	Putative pyridoxal kinase OS=Streptococcus suis A7 GN=SSUA7_1412 PE=4 SV=1 - [G7RWA8_STRSU]	nucleotide binding; catalytic activity; metal ion binding		metabolic process	0.885338	0.387265
G7S7L6	Transposase IS4 family protein OS=Streptococcus suis D9 GN=SSUD9_1210 PE=4 SV=1 - [G7S7L6_STRSU]	DNA binding; catalytic activity		metabolic process	1.04858	0.76966
A4VY71	GTP pyrophosphokinase OS=Streptococcus suis (strain 05ZYH33) GN=SSU05_2094 PE=3 SV=1 - [A4VY71_STRSY]	catalytic activity; metal ion binding		metabolic process	1.02839	0.863952
A4W028	Gamma-glutamyl phosphate reductase OS=Streptococcus suis (strain 98HAH33) GN=proA PE=3 SV=1 - [PROA_STRS2]	catalytic activity; nucleotide binding	cytoplasm	metabolic process	1.04839	0.770488
D5AJK8	ABC-type uncharacterized transport system, ATPase component OS=Streptococcus suis (strain GZ1) GN=SSGZ1_1567 PE=4 SV=1 - [D5AJK8_STRGZ]		membrane		0.783192	0.0834738
G7SMA0	Type I restriction enzyme, specificity subunit OS=Streptococcus suis ST1 GN=SSUST1_1672 PE=4 SV=1 - [G7SMA0_STRSU]				0.864062	0.299979
G7S217	DNA polymerase OS=Streptococcus suis SS12 GN=SSU12_1273 PE=3 SV=1 - [G7S217_STRSU]	DNA binding; catalytic activity		metabolic process	1.03419	0.836389
G7S6P6	Orotate phosphoribosyltransferase OS=Streptococcus suis SS12 GN=pyrE PE=3 SV=1 - [G7S6P6_STRSU]	metal ion binding; catalytic activity		metabolic process	0.781215	0.080337
G7S3V8	Putative oligopeptidase OS=Streptococcus suis SS12 GN=SSU12_1614 PE=4 SV=1 - [G7S3V8_STRSU]	catalytic activity		metabolic process	1.02858	0.863003
A4VXN5	Regulator of polyketide synthase expression OS=Streptococcus suis (strain 05ZYH33) GN=SSU05_1909 PE=4 SV=1 - [A4VXN5_STRSY]	DNA binding		metabolic process; regulation of biological process	0.994832	0.967605
G7S1L9	Glycosyltransferase OS=Streptococcus suis SS12 GN=SSU12_1188 PE=4 SV=1 - [G7S1L9_STRSU]	catalytic activity		metabolic process	0.968449	0.817667
A4VSM4	Uncharacterized protein OS=Streptococcus suis (strain 05ZYH33) GN=SSU05_0144 PE=4 SV=1 - [A4VSM4_STRSY]				1.00398	0.983006
G7S718	Dihydropteroate synthase OS=Streptococcus suis SS12 GN=SSU12_1053 PE=4 SV=1 - [G7S718_STRSU]	catalytic activity		metabolic process	1.02143	0.897426
A4W0S2	Homoserine kinase OS=Streptococcus suis (strain 98HAH33) GN=thrB PE=3 SV=1 - [KHSE_STRS2]	nucleotide binding; catalytic activity	cytoplasm	metabolic process	0.964624	0.796013
C6GXH9	N-acetylglucosamine-6-phosphate deacetylase OS=Streptococcus suis (strain BM407) GN=SSUBM407_0693 PE=3 SV=1 - [C6GXH9_STRS4]	catalytic activity		metabolic process	0.851978	0.255957
D5AJ08	DHH subfamily 1 protein OS=Streptococcus suis (strain GZ1) GN=SSGZ1_1367 PE=4 SV=1 - [D5AJ08_STRGZ]	catalytic activity; metal ion binding	membrane		1.08796	0.600839
A4VZG6	Aspartyl/glutamyl-tRNA(Asn/Gln) amidotransferase subunit B OS=Streptococcus suis (strain 98HAH33) GN=gatB PE=3 SV=1 - [GATB_STRS2]	nucleotide binding; catalytic activity		metabolic process	0.869974	0.323008
A4W4L2	Aspartate--tRNA ligase OS=Streptococcus suis (strain 98HAH33) GN=aspS PE=3 SV=1 - [SYD_STRS2]	nucleotide binding; catalytic activity	cytoplasm	metabolic process	1.04083	0.805303
A4VYQ9	30S ribosomal protein S5 OS=Streptococcus suis (strain 98HAH33) GN=rpsE PE=3 SV=1 - [RS5_STRS2]	RNA binding; structural molecule activity	cytoplasm; ribosome	metabolic process	1.12011	0.480706
B9WWT9	L-serine dehydratase, iron-sulfur-dependent, alpha subunit OS=Streptococcus suis 89/1591 GN=SsuiDRAFT_2367 PE=4 SV=1 - [B9WWT9_STRSU]	catalytic activity		metabolic process	1.01927	0.90787
G7RVL9	Heme/copper-type cytochrome/quinol oxidase, subunit 1 OS=Streptococcus suis A7 GN=SSUA7_0055 PE=4 SV=1 - [G7RVL9_STRSU]				1.07662	0.647143
R4NUH7	Exodeoxyribonuclease III OS=Streptococcus suis TL13 GN=exoC PE=4 SV=1 - [R4NUH7_STRSU]				1.08267	0.622191
G7S1M3	dTDP-4-dehydrorhamnose reductase OS=Streptococcus suis SS12 GN=SSU12_1194 PE=4 SV=1 - [G7S1M3_STRSU]	nucleotide binding; catalytic activity		metabolic process	0.742759	0.0352529
G7S535	Fructose-6-phosphate aldolase OS=Streptococcus suis SS12 GN=SSU12_0665 PE=4 SV=1 - [G7S535_STRSU]	catalytic activity	cytoplasm	metabolic process	2.55352	4.80583e-09
G7S4K8	Flavoprotein OS=Streptococcus suis SS12 GN=SSU12_0565 PE=4 SV=1 - [G7S4K8_STRSU]				0.796507	0.107017
A4W0D4	Phosphoserine aminotransferase OS=Streptococcus suis (strain 98HAH33) GN=serC PE=3 SV=1 - [SERC_STRS2]	catalytic activity	cytoplasm	metabolic process	0.953451	0.733228
G7S702	HAD superfamily hydrolase OS=Streptococcus suis SS12 GN=SSU12_1037 PE=4 SV=1 - [G7S702_STRSU]	catalytic activity		metabolic process	0.899925	0.45379
G7S3N8	Regulatory protein RecX OS=Streptococcus suis SS12 GN=recX PE=3 SV=1 - [G7S3N8_STRSU]		cytoplasm	metabolic process; regulation of biological process; response to stimulus	1.01166	0.945053
G7S2I0	Putative uncharacterized protein OS=Streptococcus suis SS12 GN=SSU12_1356 PE=3 SV=1 - [G7S2I0_STRSU]	nucleotide binding; catalytic activity		metabolic process	1.14762	0.391577
G7S2D7	Xaa-Pro dipeptidyl-peptidase OS=Streptococcus suis SS12 GN=pepX PE=3 SV=1 - [G7S2D7_STRSU]	catalytic activity	cytoplasm	metabolic process	1.09303	0.580776
C6GV22	Putative glycerate kinase OS=Streptococcus suis (strain BM407) GN=SSUBM407_1399 PE=4 SV=1 - [C6GV22_STRS4]	catalytic activity	membrane	metabolic process	0.809101	0.133383
G7S630	Transketolase OS=Streptococcus suis SS12 GN=SSU12_1988 PE=4 SV=1 - [G7S630_STRSU]	catalytic activity; metal ion binding		metabolic process	0.975851	0.859709
A4W275	Uncharacterized protein OS=Streptococcus suis (strain 98HAH33) GN=SSU98_1306 PE=4 SV=1 - [A4W275_STRS2]		membrane		1.24219	0.176531
G7RVY3	Gp21 protein OS=Streptococcus suis A7 GN=SSUA7_1363 PE=4 SV=1 - [G7RVY3_STRSU]				0.940122	0.659704
G7S209	Glycosyltransferase OS=Streptococcus suis SS12 GN=SSU12_1265 PE=4 SV=1 - [G7S209_STRSU]	catalytic activity		metabolic process	0.992868	0.956475
G7S6G8	DNA topoisomerase OS=Streptococcus suis SS12 GN=topA PE=3 SV=1 - [G7S6G8_STRSU]	nucleotide binding; DNA binding; catalytic activity; metal ion binding	chromosome	metabolic process	1.11015	0.51613
G7S463	DNA polymerase III alpha subunit OS=Streptococcus suis SS12 GN=dnaE PE=4 SV=1 - [G7S463_STRSU]	DNA binding; catalytic activity	cytoplasm	metabolic process	1.18202	0.297749
B9WVA1	Aminotransferase class I and II OS=Streptococcus suis 89/1591 GN=SsuiDRAFT_2941 PE=1 SV=1 - [B9WVA1_STRSU]	catalytic activity		metabolic process	0.899765	0.453033
D5AJL0	Peptidoglycan glycosyltransferase OS=Streptococcus suis (strain GZ1) GN=SSGZ1_1569 PE=4 SV=1 - [D5AJL0_STRGZ]	catalytic activity			0.894861	0.43012
G7S1D8	ABC-type uncharacterized transport system, ATPase component OS=Streptococcus suis SS12 GN=SSU12_1154 PE=4 SV=1 - [G7S1D8_STRSU]	nucleotide binding; catalytic activity		metabolic process	0.704991	0.0133532
R4NMZ0	Biotin carboxyl carrier protein of acetyl-CoA carboxylase OS=Streptococcus suis TL13 GN=fabE PE=4 SV=1 - [R4NMZ0_STRSU]				0.820955	0.162078
A4VYN8	Putative Holliday junction resolvase OS=Streptococcus suis (strain 98HAH33) GN=SSU98_0067 PE=3 SV=1 - [RUVX_STRS2]	catalytic activity	cytoplasm	metabolic process; response to stimulus	0.969531	0.823802
G7S5C1	Leucyl aminopeptidase (Aminopeptidase T) OS=Streptococcus suis SS12 GN=SSU12_1887 PE=4 SV=1 - [G7S5C1_STRSU]	catalytic activity		metabolic process	1.01951	0.906718
G7SI37	50S ribosomal protein L31 type B OS=Streptococcus suis D12 GN=rpmE PE=3 SV=1 - [G7SI37_STRSU]	structural molecule activity	cytoplasm; ribosome	metabolic process	1.09369	0.57822
G7SKW4	Cell division protein DivIB OS=Streptococcus suis ST1 GN=divIB PE=3 SV=1 - [G7SKW4_STRSU]		membrane	cell division; reproduction	0.966954	0.809197
G5L2K1	Putative uncharacterized protein OS=Streptococcus suis R61 GN=SSUR61_2176 PE=4 SV=1 - [G5L2K1_STRSU]		membrane		1.18101	0.300228
G7S5N9	HD-superfamily hydrolase OS=Streptococcus suis SS12 GN=SSU12_1928 PE=4 SV=1 - [G7S5N9_STRSU]	catalytic activity; metal ion binding		metabolic process	0.96853	0.818127
G7S212	Xaa-Pro aminopeptidase OS=Streptococcus suis SS12 GN=SSU12_1268 PE=3 SV=1 - [G7S212_STRSU]	catalytic activity; metal ion binding		metabolic process	0.958919	0.76385
Q7X4J9	Pseudouridine synthase OS=Streptococcus suis GN=ylyB PE=3 SV=1 - [Q7X4J9_STRSU]	RNA binding; catalytic activity		metabolic process	1.14221	0.408121
A4W236	3-dehydroquinate synthase OS=Streptococcus suis (strain 98HAH33) GN=aroB PE=3 SV=1 - [AROB_STRS2]	catalytic activity; metal ion binding	cytoplasm	metabolic process	0.934192	0.627654
G7S6L5	Putative protease OS=Streptococcus suis SS12 GN=SSU12_2093 PE=3 SV=1 - [G7S6L5_STRSU]	catalytic activity; metal ion binding		metabolic process	0.97568	0.858741
E8UNR5	Pyrimidine-nucleoside phosphorylase OS=Streptococcus suis (strain JS14) GN=SSUJS14_1062 PE=4 SV=1 - [E8UNR5_STREJ]	catalytic activity	membrane	metabolic process	1.04252	0.797458
A4VVJ5	Uncharacterized protein OS=Streptococcus suis (strain 05ZYH33) GN=SSU05_1168 PE=4 SV=1 - [A4VVJ5_STRSY]	catalytic activity; metal ion binding			2.14169	1.9854e-06
G7S2G5	EcoA type I restriction-modification enzyme R subunit OS=Streptococcus suis SS12 GN=SSU12_1341 PE=4 SV=1 - [G7S2G5_STRSU]	DNA binding; catalytic activity; nucleotide binding		metabolic process	0.879033	0.360143
A4W443	33 kDa chaperonin OS=Streptococcus suis (strain 98HAH33) GN=hslO PE=3 SV=1 - [HSLO_STRS2]	protein binding	cytoplasm	metabolic process; response to stimulus	1.01624	0.922641
A4VZY0	Lysine--tRNA ligase OS=Streptococcus suis (strain 98HAH33) GN=lysS PE=3 SV=1 - [SYK_STRS2]	RNA binding; nucleotide binding; metal ion binding; catalytic activity	cytoplasm	metabolic process	0.898899	0.448946
G7SK23	Putative uncharacterized protein OS=Streptococcus suis ST1 GN=SSUST1_0877 PE=4 SV=1 - [G7SK23_STRSU]				0.778101	0.0755744
A4VY58	Leucine--tRNA ligase OS=Streptococcus suis (strain 05ZYH33) GN=leuS PE=3 SV=2 - [SYL_STRSY]	nucleotide binding; catalytic activity	cytoplasm	metabolic process; regulation of biological process	1.05505	0.740446
G7S3W1	ABC-type molybdenum transport system, ATPase component/photorepair protein PhrA OS=Streptococcus suis SS12 GN=SSU12_1617 PE=3 SV=1 - [G7S3W1_STRSU]	nucleotide binding; catalytic activity		metabolic process	0.893122	0.422131
G7S5H9	CpsY OS=Streptococcus suis SS12 GN=SSU12_0729 PE=4 SV=1 - [G7S5H9_STRSU]	DNA binding		metabolic process; regulation of biological process	0.962344	0.783139
G5KXR0	DEAD/DEAH box helicase domain protein OS=Streptococcus suis R61 GN=SSUR61_0478 PE=4 SV=1 - [G5KXR0_STRSU]	nucleotide binding; DNA binding; catalytic activity			0.951661	0.723252
G7S2V6	Putative phosphoglycerate mutase OS=Streptococcus suis SS12 GN=SSU12_0281 PE=4 SV=1 - [G7S2V6_STRSU]				1.05039	0.761423
R4NX73	Transcriptional regulator in cluster with unspecified monosaccharide ABC transport system OS=Streptococcus suis TL13 GN=TL13_1965 PE=4 SV=1 - [R4NX73_STRSU]				0.904506	0.475701
A4VYJ8	Phosphate acyltransferase OS=Streptococcus suis (strain 98HAH33) GN=plsX PE=3 SV=1 - [PLSX_STRS2]	catalytic activity	cytoplasm	metabolic process	0.81048	0.136525
R4NLI9	UPF0109 protein ylqC OS=Streptococcus suis TL13 GN=ylqC PE=3 SV=1 - [R4NLI9_STRSU]				1.02492	0.880543
G5L0A9	50S ribosomal protein L2 OS=Streptococcus suis R61 GN=rplB PE=3 SV=1 - [G5L0A9_STRSU]	RNA binding; structural molecule activity; catalytic activity	cytoplasm; ribosome	metabolic process	1.07481	0.654709
G7S3H0	Putative uncharacterized protein OS=Streptococcus suis SS12 GN=SSU12_1542 PE=4 SV=1 - [G7S3H0_STRSU]	catalytic activity		metabolic process	0.971519	0.835088
B9WX86	Putative uncharacterized protein OS=Streptococcus suis 89/1591 GN=SsuiDRAFT_2312 PE=4 SV=1 - [B9WX86_STRSU]				0.698374	0.0110583
A4VWZ2	Probable manganese-dependent inorganic pyrophosphatase OS=Streptococcus suis (strain 05ZYH33) GN=ppaC PE=3 SV=1 - [PPAC_STRSY]	catalytic activity; metal ion binding	cytoplasm		1.00528	0.976552
R4NUX1	Substrate-specific component PdxU2 of predicted pyridoxin-related ECF transporter OS=Streptococcus suis TL13 GN=TL13_0347 PE=4 SV=1 - [R4NUX1_STRSU]				0.899789	0.453147
G7S5Y8	Putative uncharacterized protein OS=Streptococcus suis SS12 GN=SSU12_0810 PE=4 SV=1 - [G7S5Y8_STRSU]	DNA binding			1.17424	0.317311
A4VYP5	50S ribosomal protein L23 OS=Streptococcus suis (strain 98HAH33) GN=rplW PE=3 SV=1 - [RL23_STRS2]	nucleotide binding; RNA binding; structural molecule activity	cytoplasm; ribosome	metabolic process	1.0141	0.933084
D5AF52	DNA polymerase III subunit beta OS=Streptococcus suis (strain GZ1) GN=SSGZ1_0002 PE=3 SV=1 - [D5AF52_STRGZ]	DNA binding; catalytic activity	cytoplasm; membrane	metabolic process	0.981465	0.891658
G7S1Y3	ABC-type metal ion transport system, periplasmic component/surface adhesin OS=Streptococcus suis SS12 GN=SSU12_0114 PE=3 SV=1 - [G7S1Y3_STRSU]	metal ion binding		transport	0.963001	0.786844
A4VWM9	Uracil phosphoribosyltransferase OS=Streptococcus suis (strain 05ZYH33) GN=upp PE=3 SV=1 - [UPP_STRSY]	nucleotide binding; metal ion binding; catalytic activity		metabolic process	0.839803	0.215822
G7S3L4	N6-adenine-specific DNA methylase OS=Streptococcus suis SS12 GN=SSU12_0382 PE=4 SV=1 - [G7S3L4_STRSU]	RNA binding; catalytic activity		metabolic process	1.15937	0.357379
B9WVA4	ABC transporter related protein OS=Streptococcus suis 89/1591 GN=SsuiDRAFT_2944 PE=3 SV=1 - [B9WVA4_STRSU]	nucleotide binding; catalytic activity		metabolic process	0.890756	0.411373
B9WSW5	Ribose-phosphate pyrophosphokinase OS=Streptococcus suis 89/1591 GN=prs PE=3 SV=1 - [B9WSW5_STRSU]	nucleotide binding; metal ion binding; catalytic activity	cytoplasm	metabolic process	0.815271	0.147837
R4NU95	ABC transporter, ATP-binding/permease protein OS=Streptococcus suis TL13 GN=TL13_1014 PE=4 SV=1 - [R4NU95_STRSU]	nucleotide binding			0.813744	0.144165
C6GY14	Phenylalanine--tRNA ligase alpha subunit OS=Streptococcus suis (strain BM407) GN=pheS PE=3 SV=1 - [C6GY14_STRS4]	RNA binding; nucleotide binding; metal ion binding; catalytic activity	cytoplasm	metabolic process	0.908124	0.493332
G5L0U4	50S ribosomal protein L13 OS=Streptococcus suis R61 GN=rplM PE=3 SV=1 - [G5L0U4_STRSU]	structural molecule activity	cytoplasm; ribosome	metabolic process	1.04354	0.792766
A4W1S9	GTP cyclohydrolase 1 OS=Streptococcus suis (strain 98HAH33) GN=folE PE=3 SV=1 - [GCH1_STRS2]	nucleotide binding; catalytic activity; metal ion binding	cytoplasm	metabolic process	0.953067	0.731085
M3T1R0	Sialic acid biosynthesis protein NeuD OS=Streptococcus suis GN=cps2R PE=4 SV=1 - [M3T1R0_STRSU]	catalytic activity			0.879088	0.360375
A4VZN1	Methionyl-tRNA formyltransferase OS=Streptococcus suis (strain 98HAH33) GN=fmt PE=3 SV=1 - [FMT_STRS2]	catalytic activity		metabolic process	0.975236	0.856216
G7S3M9	HAD superfamily hydrolase OS=Streptococcus suis SS12 GN=SSU12_0397 PE=4 SV=1 - [G7S3M9_STRSU]	catalytic activity		metabolic process	0.87297	0.335044
G5L1Q3	ABC transporter ATPase OS=Streptococcus suis R61 GN=SSUR61_1524 PE=3 SV=1 - [G5L1Q3_STRSU]	nucleotide binding; catalytic activity		metabolic process	0.86614	0.307961
R4NU43	Aromatic amino acid aminotransferase gamma @ N-acetyl-L,L-diaminopimelate aminotransferase OS=Streptococcus suis TL13 GN=TL13_0041 PE=3 SV=1 - [R4NU43_STRSU]	catalytic activity			2.14461	1.90369e-06
G7S2K6	3-carboxymuconate cyclase OS=Streptococcus suis SS12 GN=SSU12_1382 PE=4 SV=1 - [G7S2K6_STRSU]	protein binding			1.00573	0.97436
G5L322	Putative uncharacterized protein OS=Streptococcus suis R61 GN=SSUR61_1085 PE=4 SV=1 - [G5L322_STRSU]				0.892541	0.419475
G7RX29	Putative deoxyguanosinetriphosphate triphosphohydrolase OS=Streptococcus suis A7 GN=SSUA7_0330 PE=4 SV=1 - [G7RX29_STRSU]	metal ion binding; catalytic activity		metabolic process	0.755904	0.0475377
A4VZG2	50S ribosomal protein L19 OS=Streptococcus suis (strain 98HAH33) GN=rplS PE=3 SV=1 - [RL19_STRS2]	structural molecule activity	cytoplasm; ribosome	metabolic process	1.02911	0.860494
A1YSC9	3-phosphoglycerate kinase (Fragment) OS=Streptococcus suis PE=4 SV=1 - [A1YSC9_STRSU]	catalytic activity		metabolic process	0.948344	0.704846
A4W0R4	Pyrrolidone-carboxylate peptidase OS=Streptococcus suis (strain 98HAH33) GN=pcp PE=3 SV=1 - [PCP_STRS2]	catalytic activity	cytoplasm	metabolic process	1.02489	0.880722
A4W4L9	Response regulator of the LytR/AlgR family OS=Streptococcus suis (strain 98HAH33) GN=SSU98_2150 PE=4 SV=1 - [A4W4L9_STRS2]	signal transducer activity		cell communication; regulation of biological process; response to stimulus; metabolic process	1.33237	0.0735517
B9WUQ5	Hemolysin A OS=Streptococcus suis 89/1591 GN=SsuiDRAFT_3323 PE=4 SV=1 - [B9WUQ5_STRSU]	RNA binding; catalytic activity		metabolic process	0.890503	0.410232
G7S547	ABC-type transport system involved in Fe-S cluster assembly, permease component OS=Streptococcus suis SS12 GN=SSU12_1811 PE=4 SV=1 - [G7S547_STRSU]			cell organization and biogenesis; metabolic process	0.95701	0.753132
R4NWU7	Inner membrane protein translocase component YidC, short form OxaI-like protein OS=Streptococcus suis TL13 GN=yidC PE=3 SV=1 - [R4NWU7_STRSU]				1.15574	0.367689
R4NW97	Elongation factor P OS=Streptococcus suis TL13 GN=epf PE=3 SV=1 - [R4NW97_STRSU]	RNA binding		metabolic process	0.917018	0.537796
F6L051	Hydrolase OS=Streptococcus suis PE=4 SV=1 - [F6L051_STRSU]	catalytic activity		metabolic process	0.989695	0.938467
G7S201	ABC-type polar amino acid transport system, ATPase component OS=Streptococcus suis SS12 GN=SSU12_1257 PE=3 SV=1 - [G7S201_STRSU]	nucleotide binding; catalytic activity		metabolic process	1.04927	0.766477
G7S4P7	Malonyl CoA-acyl carrier protein transacylase OS=Streptococcus suis SS12 GN=fabD PE=3 SV=1 - [G7S4P7_STRSU]	catalytic activity; protein binding		metabolic process	0.971673	0.835964
A4W2B7	50S ribosomal protein L11 OS=Streptococcus suis (strain 98HAH33) GN=rplK PE=3 SV=1 - [RL11_STRS2]	RNA binding; structural molecule activity	cytoplasm; ribosome	metabolic process	1.14867	0.388428
G7S520	Putative HsdR OS=Streptococcus suis SS12 GN=SSU12_0648 PE=4 SV=1 - [G7S520_STRSU]	DNA binding; catalytic activity; nucleotide binding		metabolic process	1.02623	0.874277
G7S4U7	ABC-type multidrug transport system, ATPase component OS=Streptococcus suis SS12 GN=SSU12_1791 PE=3 SV=1 - [G7S4U7_STRSU]	nucleotide binding; catalytic activity		metabolic process	0.909823	0.5017
G7RZZ2	LysR family regulatory protein OS=Streptococcus suis A7 GN=SSUA7_0887 PE=4 SV=1 - [G7RZZ2_STRSU]	DNA binding	membrane	metabolic process; regulation of biological process	0.968279	0.816704
J7KPM7	Aspartate aminotransferase OS=Streptococcus suis S735 GN=YYK_02690 PE=3 SV=1 - [J7KPM7_STRSU]	catalytic activity	membrane	metabolic process	1.03923	0.812765
A4VYP8	50S ribosomal protein L22 OS=Streptococcus suis (strain 98HAH33) GN=rplV PE=3 SV=1 - [RL22_STRS2]	RNA binding; structural molecule activity	cytoplasm; ribosome	metabolic process	1.15493	0.370032
C6GRJ7	UvrABC system protein C OS=Streptococcus suis (strain SC84) GN=uvrC PE=3 SV=1 - [C6GRJ7_STRSX]	DNA binding; catalytic activity; protein binding	cytoplasm	metabolic process; response to stimulus; cell communication	0.937305	0.644423
G7S4C4	NADH dehydrogenase, FAD-containing subunit OS=Streptococcus suis SS12 GN=SSU12_1699 PE=4 SV=1 - [G7S4C4_STRSU]	catalytic activity; nucleotide binding		metabolic process	1.04508	0.785635
G7S4C8	K+ transport system, NAD-binding component OS=Streptococcus suis SS12 GN=SSU12_1703 PE=4 SV=1 - [G7S4C8_STRSU]	nucleotide binding; transporter activity; catalytic activity		transport; metabolic process	1.06824	0.682613
A4VYQ7	50S ribosomal protein L6 OS=Streptococcus suis (strain 98HAH33) GN=rplF PE=3 SV=1 - [RL6_STRS2]	RNA binding; structural molecule activity	cytoplasm; ribosome	metabolic process	1.04432	0.789129
Q5IRC1	Mannose-specific PTS IIC (Fragment) OS=Streptococcus suis GN=manM PE=4 SV=1 - [Q5IRC1_STRSU]		membrane	transport	1.16629	0.338274
G7S6Q6	Amino acid ABC transporter periplasmic protein OS=Streptococcus suis SS12 GN=SSU12_0941 PE=4 SV=1 - [G7S6Q6_STRSU]	receptor activity; signal transducer activity; transporter activity	membrane	transport	1.12188	0.4746
D5AGU4	Regulatory protein, MarR OS=Streptococcus suis (strain GZ1) GN=SSGZ1_0600 PE=4 SV=1 - [D5AGU4_STRGZ]	DNA binding		metabolic process; regulation of biological process	1.01498	0.928795
G7S608	Peptide ABC transporter ATPase OS=Streptococcus suis SS12 GN=SSU12_0832 PE=3 SV=1 - [G7S608_STRSU]	nucleotide binding; catalytic activity		metabolic process	0.869981	0.323034
M1UW70	Transcriptional regulator OS=Streptococcus suis SC070731 GN=NJAUSS_1712 PE=4 SV=1 - [M1UW70_STRSU]				0.823651	0.169149
G7S2U0	Bifunctional acetaldehyde-CoA/alcohol dehydrogenase OS=Streptococcus suis SS12 GN=SSU12_0265 PE=4 SV=1 - [G7S2U0_STRSU]	catalytic activity; metal ion binding		metabolic process	0.769602	0.063658
A4W125	Methylenetetrahydrofolate--tRNA-(uracil-5-)-methyltransferase TrmFO OS=Streptococcus suis (strain 98HAH33) GN=trmFO PE=3 SV=1 - [TRMFO_STRS2]	catalytic activity; nucleotide binding	cytoplasm	metabolic process	1.05188	0.754677
G7S5Q9	Putative uncharacterized protein OS=Streptococcus suis SS12 GN=SSU12_1948 PE=4 SV=1 - [G7S5Q9_STRSU]				1.02233	0.89305
G5L2V0	NADPH:quinone reductase and related Zn-dependent oxidoreductase OS=Streptococcus suis R61 GN=SSUR61_2346 PE=4 SV=1 - [G5L2V0_STRSU]	nucleotide binding; metal ion binding; catalytic activity	membrane	metabolic process	1.79706	0.000253473
G7S6M0	Tryptophan--tRNA ligase OS=Streptococcus suis SS12 GN=trpS PE=3 SV=1 - [G7S6M0_STRSU]	nucleotide binding; catalytic activity	cytoplasm	metabolic process	0.978434	0.874408
G8DTL7	Cps1/2H OS=Streptococcus suis GN=cps1/2H PE=4 SV=1 - [G8DTL7_STRSU]		membrane		1.17271	0.321268
M1UBR1	Uncharacterized protein OS=Streptococcus suis SC070731 GN=NJAUSS_1744 PE=4 SV=1 - [M1UBR1_STRSU]				0.888327	0.400474
G5KZ78	Primosome, DnaD subunit OS=Streptococcus suis R61 GN=SSUR61_0942 PE=4 SV=1 - [G5KZ78_STRSU]		membrane		1.04948	0.765544
A4VX82	Geranylgeranyl pyrophosphate synthase OS=Streptococcus suis (strain 05ZYH33) GN=SSU05_1755 PE=3 SV=1 - [A4VX82_STRSY]	catalytic activity		metabolic process	1.25472	0.157304
R4NIE4	Ribosomal subunit interface protein OS=Streptococcus suis TL13 GN=TL13_0461 PE=4 SV=1 - [R4NIE4_STRSU]				1.09745	0.563616
G7S614	Deoxyuridine 5'-triphosphate nucleotidohydrolase OS=Streptococcus suis SS12 GN=dut PE=3 SV=1 - [G7S614_STRSU]	catalytic activity		metabolic process	0.954599	0.739638
G7S3T0	Lactoylglutathione lyase-related lyase OS=Streptococcus suis SS12 GN=SSU12_1584 PE=4 SV=1 - [G7S3T0_STRSU]	catalytic activity			1.01214	0.942737
M1U9Q5	Superfamily I DNA/RNA helicase OS=Streptococcus suis SC070731 GN=NJAUSS_0782 PE=4 SV=1 - [M1U9Q5_STRSU]	nucleotide binding; DNA binding; catalytic activity	cytoplasm	metabolic process	1.01293	0.938839
M1UTV4	ATPases with chaperone activity, ATP-binding protein OS=Streptococcus suis SC070731 GN=NJAUSS_0464 PE=3 SV=1 - [M1UTV4_STRSU]	nucleotide binding; catalytic activity			0.958342	0.760611
G7S1Q0	2-dehydropantoate 2-reductase OS=Streptococcus suis SS12 GN=SSU12_1221 PE=3 SV=1 - [G7S1Q0_STRSU]	nucleotide binding; catalytic activity	cytoplasm	metabolic process	1.04576	0.782511
M1UN89	1-acyl-sn-glycerol-3-phosphate acyltransferase OS=Streptococcus suis SC070731 GN=NJAUSS_0713 PE=4 SV=1 - [M1UN89_STRSU]	catalytic activity		metabolic process	0.996147	0.975049
G7S5D2	NADH oxidase OS=Streptococcus suis SS12 GN=nox PE=4 SV=1 - [G7S5D2_STRSU]	catalytic activity; nucleotide binding	cytoplasm	metabolic process; cellular homeostasis; regulation of biological process	0.836204	0.204777
G7SD92	Metallo-beta-lactamase superfamily hydrolase OS=Streptococcus suis D12 GN=SSUD12_0156 PE=4 SV=1 - [G7SD92_STRSU]	RNA binding; catalytic activity; metal ion binding	membrane		1.05415	0.744456
M1UAK2	Lipopolysaccharide biosynthesis protein OS=Streptococcus suis SC070731 GN=NJAUSS_1181 PE=4 SV=1 - [M1UAK2_STRSU]				0.963426	0.789243
G7S658	ATP-binding ABC transport protein OS=Streptococcus suis SS12 GN=SSU12_2016 PE=3 SV=1 - [G7S658_STRSU]	nucleotide binding; catalytic activity		metabolic process	1.09117	0.588101
M1UGG1	DNA ligase OS=Streptococcus suis SC070731 GN=ligA PE=3 SV=1 - [M1UGG1_STRSU]	DNA binding; catalytic activity; metal ion binding		metabolic process; response to stimulus	1.12186	0.474674
C6GVW3	Putative membrane protein OS=Streptococcus suis (strain BM407) GN=SSUBM407_0401 PE=4 SV=1 - [C6GVW3_STRS4]		membrane		0.961018	0.775662
G7S1P7	Phosphate starvation-inducible protein PhoH, ATPase OS=Streptococcus suis SS12 GN=SSU12_1218 PE=4 SV=1 - [G7S1P7_STRSU]	nucleotide binding			1.00999	0.953275
G7SK03	Signal transduction histidine kinase OS=Streptococcus suis ST1 GN=SSUST1_0430 PE=4 SV=1 - [G7SK03_STRSU]	catalytic activity; receptor activity; signal transducer activity; nucleotide binding; protein binding	membrane	cell communication; regulation of biological process; response to stimulus; metabolic process	0.904106	0.473769
G7S977	Putative 5'-nucleotidase OS=Streptococcus suis D9 GN=SSUD9_1529 PE=3 SV=1 - [G7S977_STRSU]	catalytic activity; metal ion binding		metabolic process	0.894612	0.428971
A4VZE7	Probable DNA-directed RNA polymerase subunit delta OS=Streptococcus suis (strain 98HAH33) GN=rpoE PE=3 SV=1 - [RPOE_STRS2]	DNA binding; catalytic activity		metabolic process; regulation of biological process	0.908461	0.494986
G7S3D9	Putative methyltransferase OS=Streptococcus suis SS12 GN=SSU12_1511 PE=4 SV=1 - [G7S3D9_STRSU]	catalytic activity		metabolic process	1.02931	0.859529
M1ULZ5	tRNA N6-adenosine threonylcarbamoyltransferase OS=Streptococcus suis SC070731 GN=tsaD PE=3 SV=1 - [M1ULZ5_STRSU]	DNA binding; catalytic activity	cytoplasm	metabolic process	0.96695	0.809172
G7S5A9	Putative uncharacterized protein OS=Streptococcus suis SS12 GN=SSU12_1875 PE=4 SV=1 - [G7S5A9_STRSU]				1.25639	0.154874
G5L1G1	Putative oligopeptide-binding protein OppA OS=Streptococcus suis R61 GN=oppA PE=4 SV=1 - [G5L1G1_STRSU]	transporter activity	membrane	transport	0.698473	0.0110902
A4VZM7	Ribonuclease Y OS=Streptococcus suis (strain 98HAH33) GN=rny PE=3 SV=1 - [RNY_STRS2]	RNA binding; catalytic activity; metal ion binding	membrane	metabolic process	1.09963	0.555269
A4W3V2	Undecaprenyl-diphosphatase OS=Streptococcus suis (strain 98HAH33) GN=uppP PE=3 SV=1 - [UPPP_STRS2]	catalytic activity	membrane	cell organization and biogenesis; regulation of biological process; metabolic process; response to stimulus	1.15198	0.378623
A4VZI7	UPF0348 protein SSU98_0368 OS=Streptococcus suis (strain 98HAH33) GN=SSU98_0368 PE=3 SV=1 - [Y368_STRS2]	catalytic activity		metabolic process	1.19014	0.278339
G7S5K8	Proline--tRNA ligase OS=Streptococcus suis SS12 GN=proS PE=3 SV=1 - [G7S5K8_STRSU]	nucleotide binding; catalytic activity	cytoplasm	metabolic process; regulation of biological process	1.07796	0.641587
A4VYR6	30S ribosomal protein S13 OS=Streptococcus suis (strain 98HAH33) GN=rpsM PE=3 SV=1 - [RS13_STRS2]	RNA binding; structural molecule activity	cytoplasm; ribosome	metabolic process	1.1225	0.472453
D5AHA1	Threonine aldolase OS=Streptococcus suis (strain GZ1) GN=SSGZ1_0759 PE=4 SV=1 - [D5AHA1_STRGZ]	catalytic activity		metabolic process	1.09657	0.56702
A4W454	Uncharacterized protein OS=Streptococcus suis (strain 98HAH33) GN=SSU98_1985 PE=4 SV=1 - [A4W454_STRS2]				1.01781	0.91496
G7S2F6	Phosphorylase OS=Streptococcus suis SS12 GN=SSU12_1332 PE=3 SV=1 - [G7S2F6_STRSU]	catalytic activity		metabolic process	1.0364	0.82599
G7S371	Fructose-bisphosphate aldolase OS=Streptococcus suis SS12 GN=SSU12_0318 PE=4 SV=1 - [G7S371_STRSU]	catalytic activity; metal ion binding		metabolic process	0.623705	0.000838085
G7S265	Copper chaperone OS=Streptococcus suis SS12 GN=SSU12_0117 PE=4 SV=1 - [G7S265_STRSU]	metal ion binding		transport	1.04202	0.79978
G7S1N7	Phosphatidylserine/phosphatidylglycerophosphate/ cardiolipin synthase-like protein OS=Streptococcus suis SS12 GN=SSU12_1208 PE=3 SV=1 - [G7S1N7_STRSU]	catalytic activity	membrane	metabolic process	0.783656	0.0842239
C6GT99	Signal recognition particle protein OS=Streptococcus suis (strain BM407) GN=ffh PE=3 SV=1 - [C6GT99_STRS4]	nucleotide binding; RNA binding; catalytic activity	cytoplasm	metabolic process; transport	0.944431	0.683271
G7S284	Cellulase M-like protein OS=Streptococcus suis SS12 GN=SSU12_0138 PE=4 SV=1 - [G7S284_STRSU]				0.798099	0.110124
Q83Z89	Suilysin (Fragment) OS=Streptococcus suis GN=sly PE=4 SV=1 - [Q83Z89_STRSU]				0.852804	0.258834
F4EFB6	Nucleoside diphosphate kinase OS=Streptococcus suis GN=ndk PE=3 SV=1 - [F4EFB6_STRSU]	nucleotide binding; catalytic activity; metal ion binding	cytoplasm	metabolic process	1.06428	0.699696
A1YSF3	Aminotransferase, class I and II (Fragment) OS=Streptococcus suis PE=4 SV=1 - [A1YSF3_STRSU]	catalytic activity		metabolic process	0.99818	0.98654
G7SAI3	ABC transporter related protein OS=Streptococcus suis D9 GN=SSUD9_1777 PE=3 SV=1 - [G7SAI3_STRSU]	nucleotide binding; catalytic activity; transporter activity	membrane	metabolic process; transport	0.978881	0.876952
G7SBI6	Isoprenyl transferase OS=Streptococcus suis D9 GN=SSUD9_1983 PE=3 SV=1 - [G7SBI6_STRSU]	metal ion binding; catalytic activity			0.959578	0.767558
G7S6T7	Transcriptional regulator OS=Streptococcus suis SS12 GN=SSU12_0972 PE=4 SV=1 - [G7S6T7_STRSU]	DNA binding			1.05156	0.756113
G5KYK6	Putative uncharacterized protein OS=Streptococcus suis R61 GN=SSUR61_0733 PE=4 SV=1 - [G5KYK6_STRSU]				0.921189	0.559163
G5L1T4	Zn-dependent peptidase OS=Streptococcus suis R61 GN=SSUR61_1555 PE=3 SV=1 - [G5L1T4_STRSU]	catalytic activity; metal ion binding	membrane	metabolic process	0.9298	0.604227
D5AFM5	Transketolase, N terminal OS=Streptococcus suis (strain GZ1) GN=SSGZ1_0175 PE=4 SV=1 - [D5AFM5_STRGZ]	catalytic activity	membrane	metabolic process	0.988771	0.933216
A4VTB0	Uncharacterized protein OS=Streptococcus suis (strain 05ZYH33) GN=SSU05_0382 PE=4 SV=1 - [A4VTB0_STRSY]	catalytic activity; nucleotide binding		metabolic process	1.03156	0.848841
G7SCL5	Transcriptional regulator, DeoR family OS=Streptococcus suis D9 GN=SSUD9_0876 PE=4 SV=1 - [G7SCL5_STRSU]	DNA binding		metabolic process; regulation of biological process	1.1226	0.47213
G7S5R2	Putative uncharacterized protein OS=Streptococcus suis SS12 GN=SSU12_1951 PE=4 SV=1 - [G7S5R2_STRSU]	catalytic activity		metabolic process	1.26222	0.146662
G7S1F8	ATP-dependent zinc metalloprotease FtsH OS=Streptococcus suis SS12 GN=ftsH PE=3 SV=1 - [G7S1F8_STRSU]	nucleotide binding; catalytic activity; protein binding; metal ion binding	membrane	metabolic process; response to stimulus; regulation of biological process	0.928941	0.599677
A4W0U8	CCA-adding enzyme OS=Streptococcus suis (strain 98HAH33) GN=cca PE=3 SV=1 - [CCA_STRS2]	RNA binding; nucleotide binding; metal ion binding; catalytic activity		metabolic process	0.91197	0.512365
G7S5M0	Putative uncharacterized protein OS=Streptococcus suis SS12 GN=SSU12_1909 PE=4 SV=1 - [G7S5M0_STRSU]	catalytic activity			0.980456	0.885918
A4VYQ4	50S ribosomal protein L24 OS=Streptococcus suis (strain 98HAH33) GN=rplX PE=3 SV=1 - [RL24_STRS2]	RNA binding; structural molecule activity	cytoplasm; ribosome	metabolic process	1.2856	0.117319
G7S3J5	Phosphotransferase system IIC component, glucose/maltose/N-acetylglucosamine-specific OS=Streptococcus suis SS12 GN=SSU12_0363 PE=4 SV=1 - [G7S3J5_STRSU]	transporter activity; catalytic activity	membrane	transport; metabolic process	0.86101	0.28847
G7RZ32	Acetyltransferase OS=Streptococcus suis A7 GN=SSUA7_1928 PE=4 SV=1 - [G7RZ32_STRSU]	catalytic activity			0.838144	0.210683
G7S4A4	Putative uncharacterized protein OS=Streptococcus suis SS12 GN=SSU12_1679 PE=4 SV=1 - [G7S4A4_STRSU]				1.01523	0.927591
J7KHA9	Collagenase-like protease OS=Streptococcus suis S735 GN=YYK_02185 PE=4 SV=1 - [J7KHA9_STRSU]	catalytic activity		metabolic process	1.01997	0.904484
G7RX55	Replication initiation/membrane attachment protein OS=Streptococcus suis A7 GN=SSUA7_1558 PE=4 SV=1 - [G7RX55_STRSU]				1.02276	0.890962
G7S3R7	Cellulase M-like protein OS=Streptococcus suis SS12 GN=SSU12_1571 PE=4 SV=1 - [G7S3R7_STRSU]				1.15168	0.3795
A4W4D6	Type II secretory pathway, pullulanase PulA and related glycosidases OS=Streptococcus suis (strain 98HAH33) GN=SSU98_2067 PE=4 SV=1 - [A4W4D6_STRS2]	catalytic activity		metabolic process	0.822554	0.166246
G7SKQ2	Ribose-phosphate pyrophosphokinase OS=Streptococcus suis ST1 GN=prs PE=3 SV=1 - [G7SKQ2_STRSU]	nucleotide binding; metal ion binding; catalytic activity	cytoplasm	metabolic process	0.898159	0.445468
Q5IRB9	ManO OS=Streptococcus suis GN=manO PE=4 SV=1 - [Q5IRB9_STRSU]				1.02662	0.872413
G7S1N9	Short-chain dehydrogenase of various substrate specificities OS=Streptococcus suis SS12 GN=SSU12_1210 PE=3 SV=1 - [G7S1N9_STRSU]	nucleotide binding; catalytic activity		metabolic process	0.890067	0.408268
A4VZB4	Protein GrpE OS=Streptococcus suis (strain 98HAH33) GN=grpE PE=3 SV=1 - [GRPE_STRS2]	enzyme regulator activity; nucleotide binding; protein binding	cytoplasm	metabolic process; response to stimulus	0.722691	0.0215058
F4EC09	Putative uncharacterized protein OS=Streptococcus suis GN=SSUST3_0267 PE=4 SV=1 - [F4EC09_STRSU]				0.998689	0.989415
G7S6L2	Cobalt transporter ATP-binding subunit OS=Streptococcus suis SS12 GN=cbiO PE=3 SV=1 - [G7S6L2_STRSU]	nucleotide binding; catalytic activity	membrane	metabolic process; transport	1.1684	0.332605
F4ECY5	Phage protein OS=Streptococcus suis GN=SSUST3_0442 PE=4 SV=1 - [F4ECY5_STRSU]				1.31689	0.0860975
A4VVA1	Sortase OS=Streptococcus suis (strain 05ZYH33) GN=SSU05_1074 PE=4 SV=1 - [A4VVA1_STRSY]		membrane		0.936869	0.642066
G7S4M8	Putative uncharacterized protein OS=Streptococcus suis SS12 GN=SSU12_0585 PE=4 SV=1 - [G7S4M8_STRSU]	metal ion binding; catalytic activity		metabolic process	1.10272	0.543603
C6GWI0	Site-specific recombinase OS=Streptococcus suis (strain BM407) GN=SSUBM407_0522 PE=4 SV=1 - [C6GWI0_STRS4]	catalytic activity; DNA binding		metabolic process	0.819134	0.157419
D5AK53	2-isopropylmalate synthase OS=Streptococcus suis (strain GZ1) GN=SSGZ1_1762 PE=4 SV=1 - [D5AK53_STRGZ]	catalytic activity	membrane	metabolic process	1.24156	0.177545
A4VT40	tRNA pseudouridine synthase A OS=Streptococcus suis (strain 05ZYH33) GN=truA PE=3 SV=1 - [TRUA_STRSY]	RNA binding; catalytic activity		metabolic process	0.915923	0.53224
G7S4R3	Phosphotransferase system IIC component, glucose/maltose/N-acetylglucosamine-specific OS=Streptococcus suis SS12 GN=SSU12_1757 PE=4 SV=1 - [G7S4R3_STRSU]	transporter activity; catalytic activity	membrane	transport; metabolic process	0.896374	0.437128
A4W3R6	Ribosome-binding factor A OS=Streptococcus suis (strain 98HAH33) GN=rbfA PE=3 SV=2 - [RBFA_STRS2]		cytoplasm	metabolic process	1.17362	0.318901
G7SAB9	Primosomal protein N' OS=Streptococcus suis D9 GN=SSUD9_0442 PE=4 SV=1 - [G7SAB9_STRSU]	nucleotide binding; DNA binding; catalytic activity		metabolic process	1.1047	0.536194
G7SPG1	Transcription termination/antitermination protein nusG OS=Streptococcus suis ST1 GN=nusG PE=3 SV=1 - [G7SPG1_STRSU]			metabolic process; regulation of biological process; cell organization and biogenesis	0.949245	0.709836
G7S2Q1	Acetyltransferase OS=Streptococcus suis SS12 GN=SSU12_0224 PE=4 SV=1 - [G7S2Q1_STRSU]	catalytic activity			1.17096	0.32583
G7S5P2	Ribulose-phosphate 3-epimerase OS=Streptococcus suis SS12 GN=SSU12_1931 PE=3 SV=1 - [G7S5P2_STRSU]	catalytic activity; metal ion binding		metabolic process	0.882912	0.376706
A4W3E8	Transcription elongation factor GreA OS=Streptococcus suis (strain 98HAH33) GN=greA PE=3 SV=1 - [GREA_STRS2]	DNA binding		metabolic process; regulation of biological process	0.973783	0.84795
G7S343	Amino acid ABC transporter periplasmic protein OS=Streptococcus suis SS12 GN=SSU12_0288 PE=3 SV=1 - [G7S343_STRSU]	transporter activity		transport	0.950651	0.717637
A4W258	Glycosyltransferases involved in cell wall biogenesis OS=Streptococcus suis (strain 98HAH33) GN=SSU98_1289 PE=4 SV=1 - [A4W258_STRS2]	catalytic activity			0.953265	0.732191
G5L268	Haloacid dehalogenase-like hydrolase OS=Streptococcus suis R61 GN=SSUR61_2274 PE=4 SV=1 - [G5L268_STRSU]	catalytic activity		metabolic process	0.762974	0.0554045
F4EDU0	Tellurite resistance protein TehB OS=Streptococcus suis GN=SSUST3_0595 PE=4 SV=1 - [F4EDU0_STRSU]	catalytic activity	cytoplasm	metabolic process; response to stimulus	1.11777	0.488893
A4VS89	Uncharacterized protein conserved in bacteria OS=Streptococcus suis (strain 05ZYH33) GN=SSU05_0004 PE=4 SV=1 - [A4VS89_STRSY]				0.829153	0.184211
A4VXI8	Predicted kinase related to dihydroxyacetone kinase OS=Streptococcus suis (strain 05ZYH33) GN=SSU05_1861 PE=4 SV=1 - [A4VXI8_STRSY]	catalytic activity		metabolic process	0.946154	0.692751
M1UUM6	Xylanase/chitin deacetylase OS=Streptococcus suis SC070731 GN=NJAUSS_0843 PE=4 SV=1 - [M1UUM6_STRSU]	catalytic activity		metabolic process	0.917913	0.542353
G7S6I4	Oxidoreductase OS=Streptococcus suis SS12 GN=SSU12_2062 PE=4 SV=1 - [G7S6I4_STRSU]	catalytic activity		metabolic process	1.00389	0.983444
J7KH02	GTPase YqeH OS=Streptococcus suis S735 GN=YYK_01585 PE=4 SV=1 - [J7KH02_STRSU]	nucleotide binding	membrane		0.786249	0.0885029
G7S3D0	Multiple sugar-binding protein OS=Streptococcus suis SS12 GN=msmE PE=4 SV=1 - [G7S3D0_STRSU]	transporter activity		transport	0.975146	0.855702
G7S4D1	UPF0291 protein SSU12_1706 OS=Streptococcus suis SS12 GN=SSU12_1706 PE=3 SV=1 - [G7S4D1_STRSU]		cytoplasm		1.10536	0.533721
G5KZ73	NADH:flavin oxidoreductase / NADH oxidase family protein OS=Streptococcus suis R61 GN=SSUR61_0937 PE=4 SV=1 - [G5KZ73_STRSU]	catalytic activity; nucleotide binding		metabolic process	0.459622	3.86115e-08
G7S3K5	ABC-type cobalt transport system, ATPase component OS=Streptococcus suis SS12 GN=SSU12_0373 PE=3 SV=1 - [G7S3K5_STRSU]	nucleotide binding; catalytic activity; transporter activity		metabolic process	1.58385	0.0041091
A4VZZ3	Elongation factor Tu OS=Streptococcus suis (strain 98HAH33) GN=tuf PE=3 SV=2 - [EFTU_STRS2]	nucleotide binding; RNA binding; catalytic activity	cytoplasm	metabolic process	1.09356	0.578707
B9WXB0	Endonuclease III OS=Streptococcus suis 89/1591 GN=SsuiDRAFT_2351 PE=3 SV=1 - [B9WXB0_STRSU]	DNA binding; catalytic activity		metabolic process; response to stimulus	1.33029	0.0751352
M1UGL5	Glycosyltransferase OS=Streptococcus suis SC070731 GN=NJAUSS_1180 PE=4 SV=1 - [M1UGL5_STRSU]	catalytic activity		metabolic process	0.96315	0.787686
G7S5P0	Putative uncharacterized protein OS=Streptococcus suis SS12 GN=SSU12_1929 PE=4 SV=1 - [G7S5P0_STRSU]				0.912134	0.513185
G7S6H3	4-alpha-glucanotransferase OS=Streptococcus suis SS12 GN=SSU12_2051 PE=4 SV=1 - [G7S6H3_STRSU]	catalytic activity		metabolic process	1.11027	0.515692
M1THP4	ATPases with chaperone activity, ATP-binding protein OS=Streptococcus suis SC070731 GN=NJAUSS_0364 PE=4 SV=1 - [M1THP4_STRSU]	nucleotide binding; catalytic activity			0.765	0.0578351
G5L175	Mannose-specific PTS IID OS=Streptococcus suis R61 GN=SSUR61_1856 PE=4 SV=1 - [G5L175_STRSU]		membrane	transport	1.24175	0.177252
G7S5K6	Putative uncharacterized protein OS=Streptococcus suis SS12 GN=SSU12_1895 PE=4 SV=1 - [G7S5K6_STRSU]		membrane	transport	0.87502	0.343423
C6GRR3	ABC transporter ATP-binding protein OS=Streptococcus suis (strain SC84) GN=SSUSC84_0736 PE=4 SV=1 - [C6GRR3_STRSX]	nucleotide binding; catalytic activity		metabolic process	0.982944	0.900074
G7SIH5	tRNA/rRNA methyltransferase OS=Streptococcus suis D12 GN=SSUD12_1875 PE=4 SV=1 - [G7SIH5_STRSU]	RNA binding; catalytic activity		metabolic process	1.02236	0.892919
G7RZ28	Uncharacterized protein OS=Streptococcus suis A7 GN=SSUA7_1924 PE=4 SV=1 - [G7RZ28_STRSU]				0.780139	0.0786668
C5VXY9	Peptide chain release factor 2 OS=Streptococcus suis (strain P1/7) GN=prfB PE=3 SV=1 - [C5VXY9_STRSE]	RNA binding	cytoplasm	metabolic process; cell organization and biogenesis	0.937529	0.645631
G7S2A5	Putative uncharacterized protein OS=Streptococcus suis SS12 GN=SSU12_0159 PE=4 SV=1 - [G7S2A5_STRSU]				0.928366	0.59664
G7S396	Probable nicotinate-nucleotide adenylyltransferase OS=Streptococcus suis SS12 GN=nadD PE=3 SV=1 - [G7S396_STRSU]	nucleotide binding; catalytic activity		metabolic process	0.870311	0.324348
A4W1L5	Deoxyribose-phosphate aldolase OS=Streptococcus suis (strain 98HAH33) GN=deoC PE=3 SV=1 - [DEOC_STRS2]	catalytic activity	cytoplasm	metabolic process	0.917043	0.53792
A4VTV2	Uncharacterized protein OS=Streptococcus suis (strain 05ZYH33) GN=SSU05_0575 PE=4 SV=1 - [A4VTV2_STRSY]				1.17596	0.312884
A4VZC9	UPF0340 protein SSU98_0310 OS=Streptococcus suis (strain 98HAH33) GN=SSU98_0310 PE=3 SV=1 - [Y310_STRS2]				1.08362	0.618311
J7KIA5	Abortive infection bacteriophage resistance related protein OS=Streptococcus suis S735 GN=YYK_03885 PE=4 SV=1 - [J7KIA5_STRSU]				1.99911	1.52923e-05
C6GSX6	Sensor histidine kinase OS=Streptococcus suis (strain SC84) GN=SSUSC84_1949 PE=4 SV=1 - [C6GSX6_STRSX]	nucleotide binding; catalytic activity		metabolic process	0.983899	0.905512
G7SCT6	Carbamoyl-phosphate synthase large chain OS=Streptococcus suis D9 GN=carB PE=3 SV=1 - [G7SCT6_STRSU]	nucleotide binding; metal ion binding; catalytic activity	membrane	metabolic process	1.26177	0.147271
G5L2Y4	Putative uncharacterized protein OS=Streptococcus suis R61 GN=SSUR61_1047 PE=4 SV=1 - [G5L2Y4_STRSU]	catalytic activity; metal ion binding	extracellular; membrane		1.15598	0.366992
G7S4Z5	Histone acetyltransferase HPA2-like acetyltransferase OS=Streptococcus suis SS12 GN=SSU12_0621 PE=4 SV=1 - [G7S4Z5_STRSU]	catalytic activity			1.03122	0.850431
G5L1N4	Arginine repressor OS=Streptococcus suis R61 GN=argR PE=3 SV=1 - [G5L1N4_STRSU]	DNA binding	cytoplasm	metabolic process; regulation of biological process; cell organization and biogenesis	1.18846	0.282272
A4W0C1	UDP-N-acetylmuramoyl-L-alanyl-D-glutamate--L-lysine ligase OS=Streptococcus suis (strain 98HAH33) GN=murE PE=3 SV=1 - [MURE_STRS2]	nucleotide binding; catalytic activity	cytoplasm	cell organization and biogenesis; regulation of biological process; metabolic process; cell division	1.05597	0.736311
G5L1N5	DNA repair protein RecN OS=Streptococcus suis R61 GN=SSUR61_2018 PE=3 SV=1 - [G5L1N5_STRSU]	nucleotide binding		metabolic process; response to stimulus	0.832332	0.193307
A4W3D3	Tyrosine recombinase XerD-like OS=Streptococcus suis (strain 98HAH33) GN=SSU98_1714 PE=3 SV=1 - [XERDL_STRS2]	DNA binding; catalytic activity	cytoplasm	metabolic process	0.982686	0.89861
G5KZ54	Phospho-2-dehydro-3-deoxyheptonate aldolase OS=Streptococcus suis R61 GN=SSUR61_0918 PE=3 SV=1 - [G5KZ54_STRSU]	catalytic activity		metabolic process	1.00508	0.97756
A4VZ90	50S ribosomal protein L33 OS=Streptococcus suis (strain 98HAH33) GN=rpmG PE=3 SV=1 - [RL33_STRS2]	structural molecule activity	cytoplasm; ribosome	metabolic process	0.849834	0.248577
G7S8N7	60 kDa chaperonin OS=Streptococcus suis D9 GN=groL PE=3 SV=1 - [G7S8N7_STRSU]	nucleotide binding; protein binding	cytoplasm	metabolic process	0.859569	0.283128
A4W088	UPF0042 nucleotide-binding protein SSU98_0619 OS=Streptococcus suis (strain 98HAH33) GN=SSU98_0619 PE=3 SV=1 - [Y619_STRS2]	nucleotide binding			1.15498	0.369884
A1YSD3	O-acetylhomoserine sulfhydrylase (Fragment) OS=Streptococcus suis PE=3 SV=1 - [A1YSD3_STRSU]	catalytic activity		metabolic process	0.987605	0.92659
B9WTB0	Phosphopantothenoylcysteine decarboxylase OS=Streptococcus suis 89/1591 GN=SsuiDRAFT_3558 PE=4 SV=1 - [B9WTB0_STRSU]	catalytic activity		metabolic process	0.840885	0.219217
C6GWX0	Zinc-binding dehydrogenase OS=Streptococcus suis (strain BM407) GN=SSUBM407_0572 PE=3 SV=1 - [C6GWX0_STRS4]	nucleotide binding; metal ion binding; catalytic activity		metabolic process	0.920946	0.557913
G7S5F7	ATP-dependent helicase/nuclease subunit A OS=Streptococcus suis SS12 GN=addA PE=3 SV=1 - [G7S5F7_STRSU]	nucleotide binding; DNA binding; catalytic activity		metabolic process; response to stimulus	1.13144	0.442467
E8ULR4	Uridylate kinase OS=Streptococcus suis (strain JS14) GN=pyrH PE=3 SV=1 - [E8ULR4_STREJ]	nucleotide binding; catalytic activity	cytoplasm; membrane	metabolic process	0.860869	0.287946
G7S4Z6	Phosphoglycerate dehydrogenase and related dehydrogenase OS=Streptococcus suis SS12 GN=SSU12_0622 PE=4 SV=1 - [G7S4Z6_STRSU]	nucleotide binding; catalytic activity		metabolic process	1.02312	0.889252
R4NY77	3-oxoacyl-[acyl-carrier protein] reductase OS=Streptococcus suis TL13 GN=fabG PE=3 SV=1 - [R4NY77_STRSU]				0.886773	0.393578
G7S288	EMAP domain-containing protein OS=Streptococcus suis SS12 GN=SSU12_0142 PE=4 SV=1 - [G7S288_STRSU]	RNA binding			0.943602	0.678719
G7S2L0	Putative uncharacterized protein OS=Streptococcus suis SS12 GN=SSU12_1386 PE=4 SV=1 - [G7S2L0_STRSU]				0.899939	0.453855
A4VYP7	30S ribosomal protein S19 OS=Streptococcus suis (strain 98HAH33) GN=rpsS PE=3 SV=2 - [RS19_STRS2]	RNA binding; structural molecule activity	cytoplasm; ribosome	metabolic process	1.04391	0.791038
Q2MZ76	Cps2K OS=Streptococcus suis GN=cps2K PE=4 SV=1 - [Q2MZ76_STRSU]	catalytic activity			1.06337	0.703692
G7S1T3	Protein RecA OS=Streptococcus suis SS12 GN=recA PE=3 SV=1 - [G7S1T3_STRSU]	nucleotide binding; DNA binding; catalytic activity	cytoplasm	metabolic process; response to stimulus; cell communication	1.0262	0.874422
D5AEX8	Ribosomal protein L11 methyltransferase OS=Streptococcus suis (strain GZ1) GN=prmA PE=3 SV=1 - [D5AEX8_STRGZ]	RNA binding; catalytic activity	cytoplasm; ribosome; membrane	metabolic process	1.26727	0.13984
G7S2V1	Isopentenyl-diphosphate delta-isomerase OS=Streptococcus suis SS12 GN=fni PE=3 SV=1 - [G7S2V1_STRSU]	catalytic activity; nucleotide binding	cytoplasm	metabolic process	0.884292	0.382692
G7S498	Primosomal protein DnaI OS=Streptococcus suis SS12 GN=SSU12_1673 PE=4 SV=1 - [G7S498_STRSU]	nucleotide binding			0.952303	0.726826
G7S3M3	Serine/threonine protein phosphatase OS=Streptococcus suis SS12 GN=SSU12_0391 PE=4 SV=1 - [G7S3M3_STRSU]	catalytic activity		metabolic process	0.874893	0.3429
G5L275	Putative uncharacterized protein OS=Streptococcus suis R61 GN=SSUR61_1917 PE=4 SV=1 - [G5L275_STRSU]				1.03854	0.815982
M1UV84	Uncharacterized protein OS=Streptococcus suis SC070731 GN=NJAUSS_1139 PE=4 SV=1 - [M1UV84_STRSU]				1.13762	0.422501
B9WY85	RNA binding S1 domain protein (Fragment) OS=Streptococcus suis 89/1591 GN=SsuiDRAFT_2057 PE=4 SV=1 - [B9WY85_STRSU]	RNA binding; structural molecule activity	cytoplasm; ribosome	metabolic process	1.02262	0.891658
G7S7J2	Putative uncharacterized protein OS=Streptococcus suis D9 GN=SSUD9_1183 PE=4 SV=1 - [G7S7J2_STRSU]				2.48153	1.38619e-08
M1UH00	Esterase OS=Streptococcus suis SC070731 GN=NJAUSS_1372 PE=4 SV=1 - [M1UH00_STRSU]				1.00491	0.978387
G5L1G3	Putative tRNA (cytidine(34)-2'-O)-methyltransferase OS=Streptococcus suis R61 GN=SSUR61_1945 PE=3 SV=1 - [G5L1G3_STRSU]	RNA binding; catalytic activity	cytoplasm	metabolic process	1.05209	0.753732
A4VYK5	Bifunctional purine biosynthesis protein PurH OS=Streptococcus suis (strain 98HAH33) GN=purH PE=3 SV=1 - [PUR9_STRS2]	catalytic activity		metabolic process	1.12533	0.462836
A4VXU2	Uncharacterized protein OS=Streptococcus suis (strain 05ZYH33) GN=SSU05_1965 PE=4 SV=1 - [A4VXU2_STRSY]		membrane		0.868873	0.318644
A4W3J4	Glycine--tRNA ligase beta subunit OS=Streptococcus suis (strain 98HAH33) GN=glyS PE=3 SV=1 - [SYGB_STRS2]	nucleotide binding; catalytic activity; metal ion binding	cytoplasm	metabolic process	0.911125	0.508159
A4W2T1	Enolase OS=Streptococcus suis (strain 98HAH33) GN=eno PE=3 SV=1 - [ENO_STRS2]	metal ion binding; catalytic activity	cytoplasm; cytosol; extracellular; cell surface	metabolic process	0.818985	0.157042
A4W2B1	Ribosome-recycling factor OS=Streptococcus suis (strain 98HAH33) GN=frr PE=3 SV=1 - [RRF_STRS2]		cytoplasm	metabolic process; cell organization and biogenesis	1.03487	0.833167
F4EEE9	DNA mismatch repair protein MutS OS=Streptococcus suis GN=mutS PE=3 SV=1 - [F4EEE9_STRSU]	nucleotide binding; DNA binding		metabolic process; response to stimulus	0.945062	0.686738
A4VT57	Trigger factor OS=Streptococcus suis (strain 05ZYH33) GN=tig PE=3 SV=1 - [TIG_STRSY]	catalytic activity	cytoplasm	metabolic process; transport; cell division	0.840629	0.218411
G5KXQ0	Fructose-2,6-bisphosphatase OS=Streptococcus suis R61 GN=SSUR61_0468 PE=4 SV=1 - [G5KXQ0_STRSU]				0.962308	0.782935
G7S3I0	Phosphomannose isomerase OS=Streptococcus suis SS12 GN=SSU12_1552 PE=3 SV=1 - [G7S3I0_STRSU]	catalytic activity; metal ion binding		metabolic process	0.9595	0.76712
A4W1D5	Uracil-DNA glycosylase OS=Streptococcus suis (strain 98HAH33) GN=ung PE=3 SV=1 - [UNG_STRS2]	catalytic activity	cytoplasm	metabolic process; response to stimulus	1.07073	0.671962
R4NWR2	Permease of the major facilitator superfamily OS=Streptococcus suis TL13 GN=TL13_1927 PE=4 SV=1 - [R4NWR2_STRSU]				0.972626	0.841378
G7S4R9	Putative metallopeptidase OS=Streptococcus suis SS12 GN=SSU12_1763 PE=3 SV=1 - [G7S4R9_STRSU]	catalytic activity; metal ion binding			0.915001	0.527575
A4VYM0	Holliday junction ATP-dependent DNA helicase RuvB OS=Streptococcus suis (strain 98HAH33) GN=ruvB PE=3 SV=1 - [RUVB_STRS2]	nucleotide binding; DNA binding; catalytic activity		metabolic process; response to stimulus; cell communication	1.08941	0.595059
R4NUZ9	Uncharacterized protein OS=Streptococcus suis TL13 GN=TL13_0389 PE=4 SV=1 - [R4NUZ9_STRSU]				1.00603	0.972881
G7S642	Putative amino acid ABC transporter, ATP-binding protein OS=Streptococcus suis SS12 GN=SSU12_2000 PE=3 SV=1 - [G7S642_STRSU]	nucleotide binding; catalytic activity		metabolic process	1.0418	0.800806
A4VUT9	Putative asparagine synthetase OS=Streptococcus suis (strain 05ZYH33) GN=SSU05_0912 PE=4 SV=1 - [A4VUT9_STRSY]	catalytic activity		metabolic process	1.37918	0.0449495
D5AKB0	Putative uncharacterized protein OS=Streptococcus suis (strain GZ1) GN=SSGZ1_1819 PE=4 SV=1 - [D5AKB0_STRGZ]	catalytic activity		metabolic process	0.873297	0.336374
G7S7D0	Spermidine/putrescine ABC transporter ATP-binding subunit OS=Streptococcus suis D9 GN=SSUD9_1115 PE=3 SV=1 - [G7S7D0_STRSU]	nucleotide binding; transporter activity; catalytic activity	membrane	metabolic process; transport	0.860117	0.285151
G7S1L6	ABC-type polysaccharide/polyol phosphate transport system, ATPase component OS=Streptococcus suis SS12 GN=SSU12_1185 PE=3 SV=1 - [G7S1L6_STRSU]	nucleotide binding; catalytic activity		metabolic process	1.07039	0.67343
G7S596	Serine acetyltransferase OS=Streptococcus suis SS12 GN=SSU12_1862 PE=3 SV=1 - [G7S596_STRSU]	catalytic activity	cytoplasm	metabolic process	1.21134	0.23234
G7S592	Mini-ribonuclease 3 OS=Streptococcus suis SS12 GN=mrnC PE=3 SV=1 - [G7S592_STRSU]	RNA binding; catalytic activity	cytoplasm	metabolic process	1.0473	0.775499
G7SAB5	ABC-type metal ion transport system, permease component OS=Streptococcus suis D9 GN=SSUD9_1776 PE=3 SV=1 - [G7SAB5_STRSU]	transporter activity	membrane	transport	0.983886	0.905439
G7S442	Cys-tRNA(Pro)/Cys-tRNA(Cys) deacylase OS=Streptococcus suis SS12 GN=SSU12_0480 PE=3 SV=1 - [G7S442_STRSU]	catalytic activity		metabolic process; regulation of biological process	1.00249	0.990449
G5KZX7	ABC-type cobalt transport system, permease component CbiQ and related transporter OS=Streptococcus suis R61 GN=SSUR61_1304 PE=4 SV=1 - [G5KZX7_STRSU]		membrane		1.04767	0.7738
A4W2M2	Purine nucleoside phosphorylase DeoD-type OS=Streptococcus suis (strain 98HAH33) GN=deoD PE=3 SV=1 - [DEOD_STRS2]	catalytic activity		metabolic process	1.01641	0.921815
G7S293	60 kDa chaperonin OS=Streptococcus suis SS12 GN=groL PE=3 SV=1 - [G7S293_STRSU]	nucleotide binding; protein binding	cytoplasm	metabolic process	0.895736	0.434168
G7S691	ABC-type multidrug transport system, ATPase component OS=Streptococcus suis SS12 GN=SSU12_0835 PE=4 SV=1 - [G7S691_STRSU]	nucleotide binding; catalytic activity		metabolic process	0.736962	0.0307101
G5KZF0	Putative uncharacterized protein OS=Streptococcus suis R61 GN=SSUR61_1017 PE=4 SV=1 - [G5KZF0_STRSU]				0.877875	0.355273
G7S3N0	Putative uncharacterized protein OS=Streptococcus suis SS12 GN=SSU12_0398 PE=4 SV=1 - [G7S3N0_STRSU]	RNA binding			1.03417	0.836474
G7S1A8	Phosphotransferase system, mannose/fructose-specific component IIA OS=Streptococcus suis SS12 GN=SSU12_1124 PE=4 SV=1 - [G7S1A8_STRSU]	catalytic activity	membrane	transport	0.913869	0.521875
G7S2H2	Uracil-DNA glycosylase OS=Streptococcus suis SS12 GN=SSU12_1348 PE=4 SV=1 - [G7S2H2_STRSU]				0.99996	0.996581
A4VX92	Glycine--tRNA ligase alpha subunit OS=Streptococcus suis (strain 05ZYH33) GN=glyQ PE=3 SV=1 - [SYGA_STRSY]	nucleotide binding; catalytic activity	cytoplasm	metabolic process	0.965366	0.800207
A4W3W8	30S ribosomal protein S9 OS=Streptococcus suis (strain 98HAH33) GN=rpsI PE=3 SV=1 - [RS9_STRS2]	structural molecule activity	cytoplasm; ribosome	metabolic process	1.10628	0.530313
G7S4P4	Acetyl-CoA carboxylase biotin carboxyl carrier protein subunit OS=Streptococcus suis SS12 GN=SSU12_1738 PE=4 SV=1 - [G7S4P4_STRSU]	catalytic activity	cytoplasm	metabolic process	0.700622	0.0117977
G5KZU1	YjgF family translation initiation inhibitor OS=Streptococcus suis R61 GN=SSUR61_1266 PE=4 SV=1 - [G5KZU1_STRSU]	catalytic activity			0.907816	0.491819
G7S3P9	Putative uncharacterized protein OS=Streptococcus suis SS12 GN=SSU12_0418 PE=4 SV=1 - [G7S3P9_STRSU]				1.67347	0.00131102
G7S9C4	NUDIX hydrolase OS=Streptococcus suis D9 GN=SSUD9_1578 PE=4 SV=1 - [G7S9C4_STRSU]	catalytic activity			0.932947	0.620984
G7SFA8	Transcriptional regulator, Cro/CI family OS=Streptococcus suis D12 GN=SSUD12_0493 PE=4 SV=1 - [G7SFA8_STRSU]	DNA binding			1.04757	0.774264
G7S4P8	2-nitropropane dioxygenase-like protein OS=Streptococcus suis SS12 GN=SSU12_1742 PE=4 SV=1 - [G7S4P8_STRSU]	catalytic activity		metabolic process	1.04701	0.776802
F4ECW6	Serine/threonine protein kinase OS=Streptococcus suis GN=SSUST3_0423 PE=4 SV=1 - [F4ECW6_STRSU]	nucleotide binding; catalytic activity		metabolic process	0.837209	0.207824
G7S4R7	Putative uncharacterized protein OS=Streptococcus suis SS12 GN=SSU12_1761 PE=4 SV=1 - [G7S4R7_STRSU]				1.09188	0.58529
G7S2K1	Transcription antiterminator OS=Streptococcus suis SS12 GN=SSU12_1377 PE=4 SV=1 - [G7S2K1_STRSU]	RNA binding		metabolic process; regulation of biological process	1.2113	0.232416
G7S4U0	Putative uncharacterized protein OS=Streptococcus suis SS12 GN=SSU12_1784 PE=4 SV=1 - [G7S4U0_STRSU]				1.59678	0.00349516
G5KZ05	6-phospho-beta-galactosidase OS=Streptococcus suis R61 GN=lacG1 PE=3 SV=1 - [G5KZ05_STRSU]	catalytic activity		metabolic process	0.864652	0.302233
Q204C2	IgG binding protein OS=Streptococcus suis PE=4 SV=1 - [Q204C2_STRSU]	nucleotide binding; catalytic activity		metabolic process	0.806993	0.128681
G5L2P5	Ribosome biogenesis GTPase A OS=Streptococcus suis R61 GN=SSUR61_2290 PE=3 SV=1 - [G5L2P5_STRSU]	nucleotide binding; transporter activity	cytoplasm; membrane	transport	1.07651	0.647619
G7S724	Putative uncharacterized protein OS=Streptococcus suis SS12 GN=SSU12_1059 PE=4 SV=1 - [G7S724_STRSU]				1.09733	0.564095
M1UE69	Hypoxanthine-guanine phosphoribosyltransferase OS=Streptococcus suis SC070731 GN=NJAUSS_0013 PE=4 SV=1 - [M1UE69_STRSU]	catalytic activity	cytoplasm	metabolic process	0.904956	0.477879
A4W2D2	Cation transport ATPase OS=Streptococcus suis (strain 98HAH33) GN=SSU98_1363 PE=3 SV=1 - [A4W2D2_STRS2]	nucleotide binding; catalytic activity; transporter activity; metal ion binding	membrane	transport; metabolic process	1.67636	0.00126278
A4VYY1	Phosphoglycerate kinase OS=Streptococcus suis (strain 98HAH33) GN=pgk PE=3 SV=1 - [PGK_STRS2]	nucleotide binding; catalytic activity	cytoplasm	metabolic process	0.850889	0.252194
M1UA90	ABC transporter permease OS=Streptococcus suis SC070731 GN=NJAUSS_1005 PE=4 SV=1 - [M1UA90_STRSU]	transporter activity	membrane	transport	0.780471	0.0791792
G7S1S8	DNA mismatch repair protein MutL OS=Streptococcus suis SS12 GN=mutL PE=3 SV=1 - [G7S1S8_STRSU]	nucleotide binding; DNA binding		metabolic process; response to stimulus	1.03877	0.814893
A4VZF0	50S ribosomal protein L28 OS=Streptococcus suis (strain 98HAH33) GN=rpmB PE=3 SV=1 - [RL28_STRS2]	structural molecule activity	cytoplasm; ribosome	metabolic process	1.02603	0.875236
G7S2U9	Mevalonate pyrophosphate decarboxylase OS=Streptococcus suis SS12 GN=SSU12_0274 PE=4 SV=1 - [G7S2U9_STRSU]	catalytic activity; nucleotide binding		metabolic process	0.933005	0.621294
G7S2M1	DJ-1/PfpI family protein OS=Streptococcus suis SS12 GN=SSU12_1397 PE=4 SV=1 - [G7S2M1_STRSU]				1.22705	0.202348
G7S1L1	Cell wall biosynthesis glycosyltransferase OS=Streptococcus suis SS12 GN=SSU12_1180 PE=4 SV=1 - [G7S1L1_STRSU]	catalytic activity			1.21522	0.224621
A4W2G9	Cation transport ATPase OS=Streptococcus suis (strain 98HAH33) GN=SSU98_1400 PE=3 SV=1 - [A4W2G9_STRS2]	nucleotide binding; catalytic activity; metal ion binding; transporter activity	membrane	metabolic process; transport	1.05094	0.758907
G7S376	Putative uncharacterized protein OS=Streptococcus suis SS12 GN=SSU12_0324 PE=4 SV=1 - [G7S376_STRSU]				0.802572	0.119198
G7S397	HD superfamily hydrolase OS=Streptococcus suis SS12 GN=SSU12_0345 PE=4 SV=1 - [G7S397_STRSU]	catalytic activity; metal ion binding		metabolic process	0.77289	0.0680847
A4W0D2	Initiation-control protein YabA OS=Streptococcus suis (strain 98HAH33) GN=SSU98_0663 PE=3 SV=1 - [YABA_STRS2]			metabolic process	1.12589	0.460938
E8UQ37	Ribosomal RNA small subunit methyltransferase A OS=Streptococcus suis (strain JS14) GN=rsmA PE=3 SV=1 - [E8UQ37_STREJ]	catalytic activity; RNA binding	cytoplasm	metabolic process	0.943421	0.677727
G7SMV6	Arsenate reductase OS=Streptococcus suis ST1 GN=SSUST1_1141 PE=4 SV=1 - [G7SMV6_STRSU]	catalytic activity		cellular homeostasis; regulation of biological process	0.915847	0.531854
G7S1W2	50S ribosomal protein L15 OS=Streptococcus suis SS12 GN=rplO PE=3 SV=1 - [G7S1W2_STRSU]	RNA binding; structural molecule activity	cytoplasm; ribosome	metabolic process	1.33183	0.0739629
G7RWZ5	Uncharacterized protein OS=Streptococcus suis A7 GN=SSUA7_0295 PE=4 SV=1 - [G7RWZ5_STRSU]				0.979274	0.879186
J7KIA8	Response regulator OS=Streptococcus suis S735 GN=YYK_03910 PE=4 SV=1 - [J7KIA8_STRSU]	signal transducer activity; DNA binding		cell communication; regulation of biological process; response to stimulus; metabolic process	1.1696	0.329407
B9WYD8	MORN repeat-containing protein (Fragment) OS=Streptococcus suis 89/1591 GN=SsuiDRAFT_2022 PE=4 SV=1 - [B9WYD8_STRSU]				1.18138	0.299321
G7S4P5	3-oxoacyl-[acyl-carrier-protein] synthase 2 OS=Streptococcus suis SS12 GN=SSU12_1739 PE=3 SV=1 - [G7S4P5_STRSU]	catalytic activity		metabolic process	0.813764	0.144212
M1UHI7	Phospho-N-acetylmuramoyl-pentapeptide-transferase OS=Streptococcus suis SC070731 GN=mraY PE=3 SV=1 - [M1UHI7_STRSU]	catalytic activity	membrane	cell organization and biogenesis; regulation of biological process; metabolic process; cell division	1.00995	0.953503
A4W1N7	rRNA methyltransferase, putative OS=Streptococcus suis (strain 98HAH33) GN=SSU98_1118 PE=4 SV=1 - [A4W1N7_STRS2]	catalytic activity		metabolic process	0.987714	0.927209
B9WXL3	Response regulator receiver protein (Fragment) OS=Streptococcus suis 89/1591 GN=SsuiDRAFT_2097 PE=4 SV=1 - [B9WXL3_STRSU]	DNA binding			0.797223	0.108405
A4VWG1	ABC-type uncharacterized transport system, ATPase component OS=Streptococcus suis (strain 05ZYH33) GN=SSU05_1484 PE=3 SV=1 - [A4VWG1_STRSY]	nucleotide binding; catalytic activity		metabolic process	1.12502	0.463873
G7S3T8	Histone acetyltransferase HPA2-like acetyltransferase OS=Streptococcus suis SS12 GN=SSU12_1592 PE=4 SV=1 - [G7S3T8_STRSU]	catalytic activity			0.984436	0.908569
G7S4P2	Acetyl-CoA carboxylase biotin carboxylase subunit OS=Streptococcus suis SS12 GN=SSU12_1736 PE=4 SV=1 - [G7S4P2_STRSU]	catalytic activity; nucleotide binding; metal ion binding		metabolic process	1.06967	0.676502
M1UFQ8	D-alanyl-D-alanine carboxypeptidase OS=Streptococcus suis SC070731 GN=NJAUSS_0796 PE=4 SV=1 - [M1UFQ8_STRSU]	catalytic activity		metabolic process	1.10427	0.537804
G7S711	Transcriptional regulator OS=Streptococcus suis SS12 GN=SSU12_1046 PE=4 SV=1 - [G7S711_STRSU]	DNA binding		metabolic process; regulation of biological process	1.22035	0.214729
G5KX09	Glycerol-3-phosphate acyltransferase OS=Streptococcus suis R61 GN=plsY PE=3 SV=1 - [G5KX09_STRSU]	catalytic activity	membrane	metabolic process	1.00542	0.975883
B9WU02	LPXTG-motif cell wall anchor domain protein OS=Streptococcus suis 89/1591 GN=SsuiDRAFT_3194 PE=4 SV=1 - [B9WU02_STRSU]				1.17001	0.32833
A5JSJ7	Putative uncharacterized protein OS=Streptococcus suis PE=4 SV=1 - [A5JSJ7_STRSU]		membrane		1.68166	0.00117845
A4W0R0	Aspartate carbamoyltransferase OS=Streptococcus suis (strain 98HAH33) GN=pyrB PE=3 SV=1 - [PYRB_STRS2]	catalytic activity		metabolic process	1.05435	0.743589
G7SPC9	Putative phage antirepressor OS=Streptococcus suis ST1 GN=SSUST1_1352 PE=4 SV=1 - [G7SPC9_STRSU]	DNA binding			0.791483	0.0976291
B9WWL7	ApbE family lipoprotein OS=Streptococcus suis 89/1591 GN=SsuiDRAFT_2428 PE=4 SV=1 - [B9WWL7_STRSU]			metabolic process	0.84459	0.231095
G7S6L9	Inosine-5'-monophosphate dehydrogenase OS=Streptococcus suis SS12 GN=guaB PE=3 SV=1 - [G7S6L9_STRSU]	nucleotide binding; catalytic activity; protein binding; metal ion binding		metabolic process	0.953817	0.735271
G5KZT9	Putative uncharacterized protein OS=Streptococcus suis R61 GN=SSUR61_1264 PE=4 SV=1 - [G5KZT9_STRSU]		membrane		1.03314	0.841356
A4W456	Transcription termination/antitermination protein nusG OS=Streptococcus suis (strain 98HAH33) GN=SSU98_1987 PE=3 SV=1 - [A4W456_STRS2]			metabolic process; regulation of biological process; cell organization and biogenesis	0.872929	0.33488
A4W1F7	UvrABC system protein B OS=Streptococcus suis (strain 98HAH33) GN=uvrB PE=3 SV=1 - [UVRB_STRS2]	nucleotide binding; DNA binding; catalytic activity; protein binding	cytoplasm	metabolic process; response to stimulus; cell communication	1.09857	0.559318
G7S1Z0	UDP-N-acetylmuramoyl-tripeptide--D-alanyl-D-alanine ligase OS=Streptococcus suis SS12 GN=SSU12_1246 PE=3 SV=1 - [G7S1Z0_STRSU]	nucleotide binding; catalytic activity	cytoplasm	cell organization and biogenesis; regulation of biological process; metabolic process; cell division	0.83431	0.199112
G7RWJ1	Endonuclease MutS2 OS=Streptococcus suis A7 GN=mutS2 PE=3 SV=1 - [G7RWJ1_STRSU]	nucleotide binding; DNA binding		metabolic process; response to stimulus	1.05434	0.743598
R4NYB6	Uncharacterized protein OS=Streptococcus suis TL13 GN=TL13_1638 PE=4 SV=1 - [R4NYB6_STRSU]				1.08142	0.627313
G7RZK1	ABC-type multidrug transport system, ATPase and permease component OS=Streptococcus suis A7 GN=SSUA7_0742 PE=3 SV=1 - [G7RZK1_STRSU]	nucleotide binding; catalytic activity; transporter activity	membrane	metabolic process; transport	0.874994	0.343312
G5KYJ8	Phosphotransacetylase OS=Streptococcus suis R61 GN=eutD PE=4 SV=1 - [G5KYJ8_STRSU]	catalytic activity		metabolic process	0.957929	0.75829
F4EFQ9	Sensor histidine kinase OS=Streptococcus suis GN=ciaH PE=4 SV=1 - [F4EFQ9_STRSU]	catalytic activity; receptor activity; signal transducer activity; nucleotide binding	membrane	cell communication; regulation of biological process; response to stimulus; metabolic process	1.02791	0.866233
G7S5Z0	Putative uncharacterized protein OS=Streptococcus suis SS12 GN=SSU12_0812 PE=4 SV=1 - [G7S5Z0_STRSU]				1.19107	0.276179
G7S5R4	RNA-binding protein OS=Streptococcus suis SS12 GN=SSU12_1953 PE=4 SV=1 - [G7S5R4_STRSU]	RNA binding			1.05086	0.759273
R4NWV9	Phosphoglucomutase OS=Streptococcus suis TL13 GN=pgmA PE=3 SV=1 - [R4NWV9_STRSU]				0.965833	0.802852
G5L0X9	Cysteine desulfurase OS=Streptococcus suis R61 GN=SSUR61_1760 PE=3 SV=1 - [G5L0X9_STRSU]	catalytic activity	membrane	metabolic process	0.989404	0.936816
G7S3I5	Putative uncharacterized protein OS=Streptococcus suis SS12 GN=SSU12_1557 PE=4 SV=1 - [G7S3I5_STRSU]				0.86305	0.296134
G7S3A7	Putative uncharacterized protein OS=Streptococcus suis SS12 GN=SSU12_0355 PE=4 SV=1 - [G7S3A7_STRSU]				1.14975	0.385199
B9WVQ0	ABC transporter related protein (Fragment) OS=Streptococcus suis 89/1591 GN=SsuiDRAFT_2813 PE=3 SV=1 - [B9WVQ0_STRSU]	nucleotide binding; catalytic activity		metabolic process	1.03661	0.825012
G7S3U9	Exodeoxyribonuclease 7 large subunit OS=Streptococcus suis SS12 GN=xseA PE=3 SV=1 - [G7S3U9_STRSU]	catalytic activity	cytoplasm	metabolic process	0.972142	0.838625
G7S4A7	Superfamily II DNA/RNA helicase OS=Streptococcus suis SS12 GN=SSU12_1682 PE=4 SV=1 - [G7S4A7_STRSU]	nucleotide binding; catalytic activity			1.12119	0.476962
G5KX22	Phosphoserine phosphatase SerB OS=Streptococcus suis R61 GN=SSUR61_0240 PE=4 SV=1 - [G5KX22_STRSU]	catalytic activity; nucleotide binding; transporter activity	membrane	metabolic process; transport	0.896979	0.439947
G8DU46	Cps1/2R OS=Streptococcus suis GN=cps14R PE=4 SV=1 - [G8DU46_STRSU]	catalytic activity		metabolic process	0.986407	0.919779
R4NVM8	Two-component sensor kinase SA14-24 OS=Streptococcus suis TL13 GN=yesM PE=4 SV=1 - [R4NVM8_STRSU]	catalytic activity		metabolic process	0.993678	0.961068
A4VWA6	DNA primase OS=Streptococcus suis (strain 05ZYH33) GN=SSU05_1429 PE=3 SV=1 - [A4VWA6_STRSY]	DNA binding; catalytic activity; metal ion binding	chromosome	metabolic process	1.16814	0.333316
G7S682	Anaerobic ribonucleoside-triphosphate reductase OS=Streptococcus suis SS12 GN=nrdD PE=4 SV=1 - [G7S682_STRSU]	nucleotide binding; catalytic activity		metabolic process	0.975265	0.856376
B9WTG2	DNA topoisomerase IV, A subunit OS=Streptococcus suis 89/1591 GN=SsuiDRAFT_3610 PE=4 SV=1 - [B9WTG2_STRSU]	DNA binding; catalytic activity; nucleotide binding	chromosome; membrane	metabolic process	1.15645	0.365659
A4VY08	Uncharacterized protein OS=Streptococcus suis (strain 05ZYH33) GN=SSU05_2031 PE=4 SV=1 - [A4VY08_STRSY]				0.964071	0.792887
M1VJZ8	Zeta toxin OS=Streptococcus suis PE=4 SV=1 - [M1VJZ8_STRSU]	nucleotide binding; catalytic activity		metabolic process	1.74309	0.000523943
G7S5P7	Metallo cofactor biosynthesis protein OS=Streptococcus suis SS12 GN=SSU12_1936 PE=4 SV=1 - [G7S5P7_STRSU]	catalytic activity		metabolic process	0.949846	0.713165
Q204E6	Capsular polysaccharide capsular OS=Streptococcus suis GN=cps2H PE=4 SV=1 - [Q204E6_STRSU]	catalytic activity			1.1639	0.344794
A4VVJ4	Uncharacterized protein OS=Streptococcus suis (strain 05ZYH33) GN=SSU05_1167 PE=4 SV=1 - [A4VVJ4_STRSY]		membrane; extracellular	transport	1.17961	0.3037
G7S4Q2	Enoyl-CoA hydratase OS=Streptococcus suis SS12 GN=SSU12_1746 PE=4 SV=1 - [G7S4Q2_STRSU]	catalytic activity		metabolic process	0.85512	0.267002
G5KXJ6	Glyceraldehyde-3-phosphate dehydrogenase OS=Streptococcus suis R61 GN=plr PE=3 SV=1 - [G5KXJ6_STRSU]	nucleotide binding; catalytic activity		metabolic process	1.05432	0.743685
G7S6Z9	Putative uncharacterized protein OS=Streptococcus suis SS12 GN=SSU12_1034 PE=4 SV=1 - [G7S6Z9_STRSU]		membrane	transport	0.930635	0.608659
A4VYQ0	50S ribosomal protein L16 OS=Streptococcus suis (strain 98HAH33) GN=rplP PE=3 SV=1 - [RL16_STRS2]	RNA binding; structural molecule activity	cytoplasm; ribosome	metabolic process	1.19074	0.276954
G7S6R3	Amino acid ABC transporter periplasmic protein OS=Streptococcus suis SS12 GN=SSU12_0948 PE=4 SV=1 - [G7S6R3_STRSU]	receptor activity; signal transducer activity; transporter activity	membrane	transport	1.025	0.880187
G7S196	Ribonucleoside-diphosphate reductase OS=Streptococcus suis SS12 GN=SSU12_1110 PE=3 SV=1 - [G7S196_STRSU]	catalytic activity; nucleotide binding	cytoplasm	metabolic process	0.922019	0.563456
G5L1W4	Putative fumarate reductase flavoprotein subunit OS=Streptococcus suis R61 GN=SSUR61_1586 PE=4 SV=1 - [G5L1W4_STRSU]	catalytic activity		metabolic process	1.04425	0.789476
G7S4S5	Single-stranded DNA-binding protein OS=Streptococcus suis SS12 GN=SSU12_1769 PE=4 SV=1 - [G7S4S5_STRSU]	DNA binding		metabolic process	1.06726	0.686836
M1V456	Putative NADPH-dependent FMN reductase OS=Streptococcus suis PE=4 SV=1 - [M1V456_STRSU]				0.912241	0.513718
G7S5B5	Putative translation factor (SUA5) OS=Streptococcus suis SS12 GN=SSU12_1881 PE=4 SV=1 - [G7S5B5_STRSU]	RNA binding			0.959929	0.769531
R4NU85	Putative competence-damage inducible protein OS=Streptococcus suis TL13 GN=cinA PE=3 SV=1 - [R4NU85_STRSU]				1.14472	0.400379
G5L251	Ribonucleoside-diphosphate reductase subunit beta OS=Streptococcus suis R61 GN=nrdF PE=3 SV=1 - [G5L251_STRSU]	catalytic activity; metal ion binding	cytoplasm; membrane	metabolic process	0.908683	0.496078
G7S5N4	Penicillin-binding protein 2A OS=Streptococcus suis SS12 GN=SSU12_1923 PE=4 SV=1 - [G7S5N4_STRSU]	catalytic activity		metabolic process; response to stimulus	1.2187	0.217863
A4W0M6	ATP-dependent helicase/deoxyribonuclease subunit B OS=Streptococcus suis (strain 98HAH33) GN=rexB PE=3 SV=1 - [ADDB_STRS2]	nucleotide binding; DNA binding; catalytic activity		metabolic process; response to stimulus	0.910517	0.505138
R4NI35	Chaperone protein DnaJ OS=Streptococcus suis TL13 GN=dnaJ PE=3 SV=1 - [R4NI35_STRSU]				1.24242	0.176163
C6GXS7	Homocysteine S-methyltransferase OS=Streptococcus suis (strain BM407) GN=mmuM PE=4 SV=1 - [C6GXS7_STRS4]	catalytic activity		metabolic process	0.7988	0.111512
A4W440	Adenylosuccinate synthetase OS=Streptococcus suis (strain 98HAH33) GN=purA PE=3 SV=2 - [PURA_STRS2]	nucleotide binding; metal ion binding; catalytic activity	cytoplasm	metabolic process	0.935426	0.634284
A4VTM2	ABC-type amino acid transport system, permease component OS=Streptococcus suis (strain 05ZYH33) GN=SSU05_0495 PE=4 SV=1 - [A4VTM2_STRSY]	transporter activity	membrane	transport	0.79335	0.101045
G7SFT0	SAM-dependent methyltransferase OS=Streptococcus suis D12 GN=SSUD12_1005 PE=4 SV=1 - [G7SFT0_STRSU]	catalytic activity		metabolic process	1.00477	0.979115
G7S6V5	DNA gyrase subunit A OS=Streptococcus suis SS12 GN=gyrA PE=3 SV=1 - [G7S6V5_STRSU]	nucleotide binding; DNA binding; catalytic activity	chromosome; cytoplasm	metabolic process	1.09313	0.580395
G7SI38	Lipoprotein involved thiamine biosynthesis OS=Streptococcus suis D12 GN=SSUD12_1489 PE=4 SV=1 - [G7SI38_STRSU]			metabolic process	0.934303	0.628247
G7S489	Putative aminodeoxychorismate lyase OS=Streptococcus suis SS12 GN=SSU12_1664 PE=4 SV=1 - [G7S489_STRSU]	catalytic activity			1.01781	0.914962
G5L2H6	Beta-lactamase superfamily hydrolase OS=Streptococcus suis R61 GN=SSUR61_2151 PE=4 SV=1 - [G5L2H6_STRSU]	catalytic activity			1.0184	0.912131
B3GFZ7	Extracellular factor protein (Fragment) OS=Streptococcus suis GN=epf PE=4 SV=1 - [B3GFZ7_STRSU]				1.08309	0.620485
A4VYQ2	30S ribosomal protein S17 OS=Streptococcus suis (strain 98HAH33) GN=rpsQ PE=3 SV=1 - [RS17_STRS2]	RNA binding; structural molecule activity	cytoplasm; ribosome	metabolic process	1.10461	0.536523
R4NN33	Putative nucleic-acid-binding protein implicated in transcription termination OS=Streptococcus suis TL13 GN=TL13_1636 PE=4 SV=1 - [R4NN33_STRSU]				1.05028	0.761914
E8UMZ2	Phosphopantothenate--cysteine ligase OS=Streptococcus suis (strain JS14) GN=SSUJS14_0778 PE=4 SV=1 - [E8UMZ2_STREJ]	catalytic activity			1.08301	0.620807
G7S6P5	Glycosyl transferase OS=Streptococcus suis SS12 GN=SSU12_0930 PE=4 SV=1 - [G7S6P5_STRSU]	catalytic activity			1.02087	0.900091
J7KS13	Pyruvate formate-lyase activating enzyme OS=Streptococcus suis S735 GN=YYK_07080 PE=4 SV=1 - [J7KS13_STRSU]	catalytic activity	membrane	metabolic process	0.974297	0.850873
G7S1E6	Diacylglycerol kinase-like sphingosine kinase OS=Streptococcus suis SS12 GN=SSU12_0003 PE=4 SV=1 - [G7S1E6_STRSU]	catalytic activity		cell communication; regulation of biological process; response to stimulus; metabolic process	0.955756	0.746111
A4VZ13	Membrane domain of membrane-anchored glycerophosphoryl diester phosphodiesterase OS=Streptococcus suis (strain 98HAH33) GN=SSU98_0194 PE=4 SV=1 - [A4VZ13_STRS2]	catalytic activity		metabolic process	0.801172	0.116303
G5L226	Type III restriction-modification system, restriction endonuclease subunit OS=Streptococcus suis R61 GN=SSUR61_2232 PE=4 SV=1 - [G5L226_STRSU]	DNA binding; catalytic activity; nucleotide binding	membrane		1.69799	0.000951711
G5L008	GTP-binding protein YqeH OS=Streptococcus suis R61 GN=SSUR61_1335 PE=4 SV=1 - [G5L008_STRSU]	catalytic activity; nucleotide binding; transporter activity	membrane	transport	1.2795	0.124437
A4VXA5	Putative PTS system, mannose-specific component IIAB OS=Streptococcus suis (strain 05ZYH33) GN=SSU05_1778 PE=4 SV=1 - [A4VXA5_STRSY]	catalytic activity; transporter activity	cytoplasm; membrane	transport	1.05651	0.7339
K7ZNG8	DNA recombination/repair protein (Fragment) OS=Streptococcus suis GN=recN PE=4 SV=1 - [K7ZNG8_STRSU]	nucleotide binding		metabolic process; response to stimulus	1.55802	0.00565876
M1UFD5	Uncharacterized protein OS=Streptococcus suis SC070731 GN=NJAUSS_0625 PE=4 SV=1 - [M1UFD5_STRSU]				0.847366	0.240253
B9WVL6	Glycosyl transferase family 8 OS=Streptococcus suis 89/1591 GN=SsuiDRAFT_3012 PE=4 SV=1 - [B9WVL6_STRSU]	catalytic activity			1.02622	0.874301
G7SPK4	DNA repair protein radA OS=Streptococcus suis ST1 GN=SSUST1_1925 PE=3 SV=1 - [G7SPK4_STRSU]	nucleotide binding; DNA binding; catalytic activity; metal ion binding	membrane	metabolic process; response to stimulus	0.969154	0.821668
G7S280	Acetate kinase OS=Streptococcus suis SS12 GN=ackA PE=3 SV=1 - [G7S280_STRSU]	nucleotide binding; metal ion binding; catalytic activity	cytoplasm	metabolic process	0.973315	0.845292
M1VE09	UDP-N-acetylglucosamine 2-epimerase OS=Streptococcus suis GN=cps30N PE=4 SV=1 - [M1VE09_STRSU]	catalytic activity		metabolic process	1.03069	0.852948
G7S5K7	Glycerol uptake facilitator and related permease (Major Intrinsic protein family) OS=Streptococcus suis SS12 GN=SSU12_1896 PE=3 SV=1 - [G7S5K7_STRSU]	transporter activity	membrane	transport	1.2414	0.177806
G7S741	UDP-N-acetylglucosamine 1-carboxyvinyltransferase OS=Streptococcus suis SS12 GN=murA PE=3 SV=1 - [G7S741_STRSU]	catalytic activity	cytoplasm	cell organization and biogenesis; regulation of biological process; metabolic process; cell division	0.94866	0.706593
G7S1J0	Phosphatase OS=Streptococcus suis SS12 GN=SSU12_0049 PE=4 SV=1 - [G7S1J0_STRSU]	catalytic activity		metabolic process	0.829908	0.186345
G5KXS6	Ribonuclease BN-like family protein OS=Streptococcus suis R61 GN=SSUR61_0495 PE=4 SV=1 - [G5KXS6_STRSU]		membrane		0.783217	0.0835149
G7S1R6	Transcriptional regulator OS=Streptococcus suis SS12 GN=SSU12_1237 PE=4 SV=1 - [G7S1R6_STRSU]	DNA binding		metabolic process; regulation of biological process	1.23607	0.186624
G7S6K5	Ketosteroid isomerase-like protein OS=Streptococcus suis SS12 GN=SSU12_2083 PE=4 SV=1 - [G7S6K5_STRSU]	catalytic activity			0.995246	0.969947
G5KXE2	Glucose-1-phosphate-uridylyltransferase OS=Streptococcus suis R61 GN=SSUR61_0360 PE=4 SV=1 - [G5KXE2_STRSU]	catalytic activity		metabolic process	1.01523	0.927587
C6GVM9	BirA bifunctional protein [includes: biotin operon repressor biotin--[acetyl-CoA-carboxylase] synthetase] OS=Streptococcus suis (strain BM407) GN=birA PE=4 SV=1 - [C6GVM9_STRS4]	catalytic activity	membrane	metabolic process; regulation of biological process	1.32259	0.0812713
M1U9R7	Protein phnB OS=Streptococcus suis SC070731 GN=NJAUSS_0797 PE=4 SV=1 - [M1U9R7_STRSU]				0.976236	0.861901
M1UAF6	Glutaredoxin-like protein OS=Streptococcus suis SC070731 GN=NJAUSS_1115 PE=4 SV=1 - [M1UAF6_STRSU]	catalytic activity		cellular homeostasis; regulation of biological process	1.24941	0.165224
D5AJR7	Acyl carrier protein OS=Streptococcus suis (strain GZ1) GN=acpP PE=3 SV=1 - [D5AJR7_STRGZ]		cytoplasm	metabolic process	0.763779	0.0563601
G5L1L3	Putative uncharacterized protein OS=Streptococcus suis R61 GN=SSUR61_1995 PE=4 SV=1 - [G5L1L3_STRSU]	DNA binding		metabolic process; regulation of biological process	0.719823	0.0199609
G7S523	Putative uncharacterized protein OS=Streptococcus suis SS12 GN=SSU12_0651 PE=4 SV=1 - [G7S523_STRSU]		membrane		0.921347	0.559979
G7S2I6	SAM-dependent methyltransferase OS=Streptococcus suis SS12 GN=SSU12_1362 PE=4 SV=1 - [G7S2I6_STRSU]	catalytic activity		metabolic process	1.02451	0.882545
G8DTK5	Cps14T OS=Streptococcus suis GN=cps1T PE=4 SV=1 - [G8DTK5_STRSU]	catalytic activity		metabolic process	1.00333	0.986262
B9WT52	Transposase family protein OS=Streptococcus suis 89/1591 GN=SsuiDRAFT_2589 PE=4 SV=1 - [B9WT52_STRSU]	DNA binding			1.09528	0.572014
M1UFP9	Thiamine-phosphate synthase OS=Streptococcus suis SC070731 GN=thiE PE=3 SV=1 - [M1UFP9_STRSU]	metal ion binding; catalytic activity		metabolic process	2.29803	2.04611e-07
G7S5N3	50S ribosomal protein L33 OS=Streptococcus suis SS12 GN=rpmG PE=3 SV=1 - [G7S5N3_STRSU]	structural molecule activity	cytoplasm; ribosome	metabolic process	1.13524	0.430121
G7RZP3	Release factor glutamine methyltransferase OS=Streptococcus suis A7 GN=prmC PE=3 SV=1 - [G7RZP3_STRSU]	catalytic activity	cytoplasm	metabolic process	0.871138	0.327655
G7S178	Putative uncharacterized protein OS=Streptococcus suis SS12 GN=SSU12_1092 PE=4 SV=1 - [G7S178_STRSU]				1.77489	0.000342082
G7SMF2	Putative uncharacterized protein OS=Streptococcus suis ST1 GN=SSUST1_0151 PE=4 SV=1 - [G7SMF2_STRSU]				1.12209	0.473863
R4NUB1	50S ribosomal protein L18 OS=Streptococcus suis TL13 GN=rplR PE=3 SV=1 - [R4NUB1_STRSU]		cytoplasm; ribosome		1.03838	0.816734
G7SMG3	Elongation factor G OS=Streptococcus suis ST1 GN=fus PE=3 SV=1 - [G7SMG3_STRSU]	nucleotide binding; RNA binding; catalytic activity	cytoplasm	metabolic process	3.66768	4.81509e-16
G7S1S4	Folylpolyglutamate synthase OS=Streptococcus suis SS12 GN=SSU12_0053 PE=4 SV=1 - [G7S1S4_STRSU]	nucleotide binding; catalytic activity		metabolic process	1.11657	0.493119
G8DU82	Transposase OS=Streptococcus suis GN=tnp4 PE=4 SV=1 - [G8DU82_STRSU]				2.37677	6.45944e-08
R4NLK5	SSU ribosomal protein S1p OS=Streptococcus suis TL13 GN=rpsA PE=4 SV=1 - [R4NLK5_STRSU]		cytoplasm; ribosome		3.46851	8.02247e-15
A4VW76	Endoribonuclease YbeY OS=Streptococcus suis (strain 05ZYH33) GN=ybeY PE=3 SV=1 - [YBEY_STRSY]	catalytic activity; metal ion binding	cytoplasm	metabolic process	0.934301	0.628234
G7S1A6	Phosphotransferase system, mannose/fructose/N-acetylgalactosamine-specific component IIB OS=Streptococcus suis SS12 GN=SSU12_1122 PE=4 SV=1 - [G7S1A6_STRSU]	catalytic activity; transporter activity	cytoplasm	transport	1.07203	0.666439
C5VVB3	LemA family protein OS=Streptococcus suis (strain P1/7) GN=SSU1745 PE=4 SV=1 - [C5VVB3_STRSE]		membrane		0.978116	0.872599
A4VZR3	Superfamily II helicase OS=Streptococcus suis (strain 98HAH33) GN=SSU98_0444 PE=4 SV=1 - [A4VZR3_STRS2]	nucleotide binding; DNA binding; catalytic activity		metabolic process; response to stimulus	1.18061	0.301227
G7S4U8	Diadenosine tetraphosphate (Ap4A) hydrolas-like HIT family hydrolase OS=Streptococcus suis SS12 GN=SSU12_1792 PE=4 SV=1 - [G7S4U8_STRSU]	catalytic activity		metabolic process	0.946637	0.695413
G7S6U8	Cysteine sulfinate desulfinase/cysteine desulfurase OS=Streptococcus suis SS12 GN=SSU12_0983 PE=3 SV=1 - [G7S6U8_STRSU]	catalytic activity		metabolic process	1.07581	0.650538
G7S3A0	Ribosomal silencing factor RsfS OS=Streptococcus suis SS12 GN=rsfS PE=3 SV=1 - [G7S3A0_STRSU]		cytoplasm	metabolic process; regulation of biological process; cell organization and biogenesis	0.75077	0.042394
A4W106	Signal transduction histidine kinase OS=Streptococcus suis (strain 98HAH33) GN=SSU98_0887 PE=4 SV=1 - [A4W106_STRS2]	catalytic activity; receptor activity; signal transducer activity; nucleotide binding	membrane	cell communication; regulation of biological process; response to stimulus; metabolic process	1.62492	0.0024488
A4W3Q0	30S ribosomal protein S18 OS=Streptococcus suis (strain 98HAH33) GN=rpsR PE=3 SV=1 - [RS18_STRS2]	RNA binding; structural molecule activity	cytoplasm; ribosome	metabolic process	1.0778	0.642219
G7SEP2	Putative uncharacterized protein OS=Streptococcus suis D12 GN=SSUD12_2006 PE=4 SV=1 - [G7SEP2_STRSU]	DNA binding	membrane		1.50257	0.0110702
G7S1C7	Putative uncharacterized protein OS=Streptococcus suis SS12 GN=SSU12_1143 PE=4 SV=1 - [G7S1C7_STRSU]				1.1811	0.300007
G7S435	Membrane-fusion protein OS=Streptococcus suis SS12 GN=SSU12_0473 PE=4 SV=1 - [G7S435_STRSU]		membrane	transport	1.00167	0.994479
R4NWU2	ATPase component of general energizing module of ECF transporters OS=Streptococcus suis TL13 GN=TL13_1962 PE=4 SV=1 - [R4NWU2_STRSU]				1.00014	0.997622
G7S2U8	Mevalonate kinase OS=Streptococcus suis SS12 GN=SSU12_0273 PE=3 SV=1 - [G7S2U8_STRSU]	nucleotide binding; catalytic activity	cytoplasm	metabolic process	0.937056	0.643075
G7S5B8	3-isopropylmalate dehydrogenase OS=Streptococcus suis SS12 GN=leuB PE=3 SV=1 - [G7S5B8_STRSU]	metal ion binding; catalytic activity; nucleotide binding	cytoplasm	metabolic process	1.51312	0.00976061
G7S1J8	Histidine triad protein OS=Streptococcus suis SS12 GN=SSU12_1167 PE=4 SV=1 - [G7S1J8_STRSU]				1.16581	0.33958
M1TM87	Signaling protein OS=Streptococcus suis SC070731 GN=NJAUSS_1980 PE=4 SV=1 - [M1TM87_STRSU]	catalytic activity; metal ion binding			1.14528	0.398658
C6GMK1	Penicillin-binding protein 2b OS=Streptococcus suis (strain SC84) GN=penA PE=4 SV=1 - [C6GMK1_STRSX]				0.994416	0.965248
G5L248	Putative uncharacterized protein OS=Streptococcus suis R61 GN=SSUR61_2254 PE=4 SV=1 - [G5L248_STRSU]				0.734501	0.0289297
G5KZL6	Aminotransferase class V OS=Streptococcus suis R61 GN=SSUR61_0089 PE=3 SV=1 - [G5KZL6_STRSU]	catalytic activity		metabolic process	0.940056	0.659346
G7S484	rRNA methylase OS=Streptococcus suis SS12 GN=SSU12_1660 PE=4 SV=1 - [G7S484_STRSU]	RNA binding; catalytic activity		metabolic process	1.16539	0.340703
D5AIT2	Putative uncharacterized protein OS=Streptococcus suis (strain GZ1) GN=SSGZ1_1291 PE=4 SV=1 - [D5AIT2_STRGZ]				1.20047	0.2551
A4VSF4	50S ribosomal protein L3 OS=Streptococcus suis (strain 05ZYH33) GN=rplC PE=3 SV=1 - [RL3_STRSY]	RNA binding; structural molecule activity	cytoplasm; ribosome	metabolic process	1.13254	0.438876
R4NJX4	Topoisomerase IV subunit A OS=Streptococcus suis TL13 GN=parC PE=4 SV=1 - [R4NJX4_STRSU]	catalytic activity			1.14003	0.414892
A4VYX6	Elongation factor G OS=Streptococcus suis (strain 98HAH33) GN=fusA PE=3 SV=1 - [EFG_STRS2]	nucleotide binding; RNA binding; catalytic activity	cytoplasm	metabolic process	1.04101	0.80447
G7S6S5	Tagatose 1,6-diphosphate aldolase OS=Streptococcus suis SS12 GN=lacD1 PE=3 SV=1 - [G7S6S5_STRSU]	catalytic activity		metabolic process	0.861884	0.291739
G7S2X6	30S ribosomal protein S14 OS=Streptococcus suis SS12 GN=rpsN PE=3 SV=1 - [G7S2X6_STRSU]	RNA binding; structural molecule activity	cytoplasm; ribosome	metabolic process	1.02878	0.862057
G7SDH9	Putative uncharacterized protein OS=Streptococcus suis D12 GN=SSUD12_0412 PE=4 SV=1 - [G7SDH9_STRSU]	nucleotide binding	membrane		0.555777	3.25664e-05
G7S2Q4	Peptide methionine sulfoxide reductase OS=Streptococcus suis SS12 GN=SSU12_0227 PE=3 SV=1 - [G7S2Q4_STRSU]	catalytic activity		metabolic process	1.01209	0.942967
C6GSW5	Putative alpha amylase OS=Streptococcus suis (strain SC84) GN=SSUSC84_1938 PE=4 SV=1 - [C6GSW5_STRSX]	catalytic activity		metabolic process	1.07856	0.639101
G5KZX3	Holliday junction resolvase RecU OS=Streptococcus suis R61 GN=recU PE=3 SV=1 - [G5KZX3_STRSU]	metal ion binding; catalytic activity	cytoplasm; membrane	metabolic process; response to stimulus	0.950894	0.718987
G7S5C2	Putative uncharacterized protein OS=Streptococcus suis SS12 GN=SSU12_1888 PE=4 SV=1 - [G7S5C2_STRSU]	catalytic activity		metabolic process	0.848597	0.244382
A4W3M3	3-hydroxyacyl-[acyl-carrier-protein] dehydratase FabZ OS=Streptococcus suis (strain 98HAH33) GN=fabZ PE=3 SV=1 - [FABZ_STRS2]	catalytic activity	cytoplasm	metabolic process	0.815854	0.149258
A4W252	50S ribosomal protein L35 OS=Streptococcus suis (strain 98HAH33) GN=rpmI PE=3 SV=1 - [RL35_STRS2]	structural molecule activity	cytoplasm; ribosome	metabolic process	1.12177	0.474982
G7S2D6	Putative uncharacterized protein OS=Streptococcus suis SS12 GN=SSU12_0190 PE=4 SV=1 - [G7S2D6_STRSU]		extracellular; membrane		0.744953	0.0371064
G7S233	Formamidopyrimidine-DNA glycosylase OS=Streptococcus suis SS12 GN=mutM PE=3 SV=1 - [G7S233_STRSU]	DNA binding; catalytic activity; metal ion binding		metabolic process; response to stimulus	0.97309	0.844013
G5KZY9	Transcriptional regulator OS=Streptococcus suis R61 GN=SSUR61_1316 PE=4 SV=1 - [G5KZY9_STRSU]	DNA binding		metabolic process; regulation of biological process	0.86264	0.294583
G5L2L4	Glycosidase OS=Streptococcus suis R61 GN=SSUR61_2190 PE=4 SV=1 - [G5L2L4_STRSU]	catalytic activity	membrane	metabolic process	1.35565	0.0577491
G7S5K9	Membrane-associated Zn-dependent proteases 1 OS=Streptococcus suis SS12 GN=SSU12_1898 PE=3 SV=1 - [G7S5K9_STRSU]	catalytic activity; protein binding	membrane	metabolic process	1.24238	0.176232
A4W1H6	Galactose-6-phosphate isomerase subunit LacB OS=Streptococcus suis (strain 98HAH33) GN=lacB PE=3 SV=1 - [LACB_STRS2]	catalytic activity		metabolic process	1.39123	0.0394481
J7KNH5	ABC transporter substrate-binding protein OS=Streptococcus suis S735 GN=YYK_06285 PE=4 SV=1 - [J7KNH5_STRSU]				0.971457	0.834736
A4W1B6	50S ribosomal protein L7/L12 OS=Streptococcus suis (strain 98HAH33) GN=rplL PE=3 SV=1 - [RL7_STRS2]	structural molecule activity	cytoplasm; ribosome	metabolic process	1.09813	0.561024
A4VX34	UPF0154 protein SSU05_1707 OS=Streptococcus suis (strain 05ZYH33) GN=SSU05_1707 PE=3 SV=1 - [Y1707_STRSY]	metal ion binding	membrane		0.698413	0.0110708
G7SBZ7	Hippurate hydrolase-like protein OS=Streptococcus suis D9 GN=SSUD9_2065 PE=4 SV=1 - [G7SBZ7_STRSU]	catalytic activity		metabolic process	1.10811	0.523552
M1UH09	Fibronectin/fibrinogen binding protein OS=Streptococcus suis SC070731 GN=NJAUSS_1382 PE=4 SV=1 - [M1UH09_STRSU]				1.2777	0.126616
A4W235	Shikimate dehydrogenase OS=Streptococcus suis (strain 98HAH33) GN=aroE PE=3 SV=1 - [AROE_STRS2]	nucleotide binding; catalytic activity		metabolic process	0.966128	0.804521
D5AKB1	Antitoxin of toxin-antitoxin stability system OS=Streptococcus suis (strain GZ1) GN=SSGZ1_1820 PE=4 SV=1 - [D5AKB1_STRGZ]				1.0905	0.590735
G7S4B3	Transcriptional regulator OS=Streptococcus suis SS12 GN=SSU12_1688 PE=4 SV=1 - [G7S4B3_STRSU]	DNA binding			1.07396	0.658272
G7S4P0	Acetyl-coenzyme A carboxylase carboxyl transferase subunit alpha OS=Streptococcus suis SS12 GN=accA PE=3 SV=1 - [G7S4P0_STRSU]	nucleotide binding; catalytic activity	cytoplasm	metabolic process	1.07637	0.648169
A4W3M1	Acetyl-coenzyme A carboxylase carboxyl transferase subunit beta OS=Streptococcus suis (strain 98HAH33) GN=accD PE=3 SV=1 - [ACCD_STRS2]	nucleotide binding; catalytic activity; metal ion binding	cytoplasm	metabolic process	1.00675	0.969275
D5AKA5	Phosphoglycerol transferase-like protein OS=Streptococcus suis (strain GZ1) GN=SSGZ1_1814 PE=4 SV=1 - [D5AKA5_STRGZ]	catalytic activity	membrane	metabolic process	1.0965	0.567294
G7SDX6	50S ribosomal protein L7/L12 OS=Streptococcus suis D12 GN=rplL PE=3 SV=1 - [G7SDX6_STRSU]	structural molecule activity	cytoplasm; ribosome	metabolic process	1.9182	4.77655e-05
G7SLP3	Negative regulator of copper transport operon OS=Streptococcus suis ST1 GN=copY PE=4 SV=1 - [G7SLP3_STRSU]	DNA binding		metabolic process; regulation of biological process	1.10353	0.540558
D5AHL3	50S ribosomal protein L10 OS=Streptococcus suis (strain GZ1) GN=rplJ PE=3 SV=1 - [D5AHL3_STRGZ]	RNA binding	cytoplasm; ribosome; membrane	metabolic process	1.06373	0.702096
G7S1H8	Putative uncharacterized protein OS=Streptococcus suis SS12 GN=SSU12_0037 PE=4 SV=1 - [G7S1H8_STRSU]				0.90272	0.467103
E8UKS0	Pyrroline-5-carboxylate reductase OS=Streptococcus suis (strain JS14) GN=SSUJS14_0521 PE=4 SV=1 - [E8UKS0_STREJ]	nucleotide binding; catalytic activity	cytoplasm; membrane	metabolic process	0.8999	0.453672
G7S9C9	Putative uncharacterized protein OS=Streptococcus suis D9 GN=SSUD9_1583 PE=4 SV=1 - [G7S9C9_STRSU]				0.979405	0.879934
A4VYR7	30S ribosomal protein S11 OS=Streptococcus suis (strain 98HAH33) GN=rpsK PE=3 SV=1 - [RS11_STRS2]	RNA binding; structural molecule activity	cytoplasm; ribosome	metabolic process	1.41649	0.0298641
A4VVH2	NTP pyrophosphohydrolase including oxidative damage repair enzymes OS=Streptococcus suis (strain 05ZYH33) GN=SSU05_1145 PE=3 SV=1 - [A4VVH2_STRSY]	catalytic activity		metabolic process; response to stimulus	0.815804	0.149135
G7S5J3	ABC transporter, ATP-binding/permease protein OS=Streptococcus suis SS12 GN=SSU12_0743 PE=3 SV=1 - [G7S5J3_STRSU]	nucleotide binding; catalytic activity; transporter activity	membrane	metabolic process; transport	1.09305	0.580689
G7S5U2	Histidinol-phosphate/aromatic aminotransferase and cobyric acid decarboxylase OS=Streptococcus suis SS12 GN=SSU12_0764 PE=3 SV=1 - [G7S5U2_STRSU]	catalytic activity		metabolic process	1.14454	0.400923
A4VT67	Fructose-bisphosphate aldolase OS=Streptococcus suis (strain 05ZYH33) GN=SSU05_0338 PE=4 SV=1 - [A4VT67_STRSY]	catalytic activity; metal ion binding		metabolic process	0.995624	0.972089
G5L058	Acyl carrier protein OS=Streptococcus suis R61 GN=acpP PE=3 SV=1 - [G5L058_STRSU]		cytoplasm	metabolic process	0.736191	0.030143
R4NWA0	Phosphate transport ATP-binding protein PstB OS=Streptococcus suis TL13 GN=pstB PE=3 SV=1 - [R4NWA0_STRSU]	nucleotide binding			1.00882	0.95908
G7S2N6	6-phosphogluconolactonase/glucosamine-6-phosphate isomerase/deaminase OS=Streptococcus suis SS12 GN=SSU12_0209 PE=4 SV=1 - [G7S2N6_STRSU]	catalytic activity		metabolic process	0.889003	0.403495
B9WXE0	Phosphatidate cytidylyltransferase OS=Streptococcus suis 89/1591 GN=SsuiDRAFT_2468 PE=3 SV=1 - [B9WXE0_STRSU]	catalytic activity	membrane	metabolic process	1.42823	0.0261856
G5KYI8	Putative uncharacterized protein OS=Streptococcus suis R61 GN=SSUR61_0715 PE=4 SV=1 - [G5KYI8_STRSU]				0.977624	0.869798
G5L1N9	Nucleoid DNA-binding protein OS=Streptococcus suis R61 GN=SSUR61_2022 PE=3 SV=1 - [G5L1N9_STRSU]	DNA binding		cell organization and biogenesis; metabolic process	3.79647	7.96815e-17
G7RWZ2	Phosphomethylpyrimidine kinase OS=Streptococcus suis A7 GN=SSUA7_0292 PE=4 SV=1 - [G7RWZ2_STRSU]	nucleotide binding; catalytic activity		metabolic process	0.870761	0.326146
G5L1U9	Transcriptional regulator, HxlR family OS=Streptococcus suis R61 GN=SSUR61_1570 PE=4 SV=1 - [G5L1U9_STRSU]				1.07788	0.641902
A4W1C8	Ribonuclease HII OS=Streptococcus suis (strain 98HAH33) GN=rnhB PE=3 SV=1 - [RNH2_STRS2]	RNA binding; catalytic activity; metal ion binding	cytoplasm	metabolic process	0.978526	0.874929
F4EF08	Putative uncharacterized protein OS=Streptococcus suis GN=SSUST3_0854 PE=4 SV=1 - [F4EF08_STRSU]				1.00081	0.998762
R4NJR0	4-oxalocrotonate tautomerase Xylose transport system permease protein xylH OS=Streptococcus suis TL13 GN=xylH PE=4 SV=1 - [R4NJR0_STRSU]				1.11177	0.510246
G7S8P6	Putative uncharacterized protein OS=Streptococcus suis D9 GN=SSUD9_0164 PE=4 SV=1 - [G7S8P6_STRSU]			response to stimulus	0.868698	0.317955
G5L1M3	3-hydroxy-3-methylglutaryl CoA synthase OS=Streptococcus suis R61 GN=SSUR61_2006 PE=4 SV=1 - [G5L1M3_STRSU]	catalytic activity		metabolic process	1.04584	0.78218
A4W1D9	Orotidine 5'-phosphate decarboxylase OS=Streptococcus suis (strain 98HAH33) GN=pyrF PE=3 SV=1 - [PYRF_STRS2]	catalytic activity		metabolic process	1.35441	0.0585038
B9WVC9	Putative uncharacterized protein OS=Streptococcus suis 89/1591 GN=SsuiDRAFT_2969 PE=4 SV=1 - [B9WVC9_STRSU]	protein binding			0.950808	0.718511
G7SIH8	Putative uncharacterized protein OS=Streptococcus suis D12 GN=SSUD12_1878 PE=4 SV=1 - [G7SIH8_STRSU]		membrane		1.27439	0.130692
A4VUR4	Uncharacterized protein OS=Streptococcus suis (strain 05ZYH33) GN=SSU05_0887 PE=4 SV=1 - [A4VUR4_STRSY]				1.37969	0.0447053
A4VXA1	5-methyltetrahydropteroyltriglutamate--homocysteine methyltransferase OS=Streptococcus suis (strain 05ZYH33) GN=metE PE=3 SV=1 - [METE_STRSY]	catalytic activity; metal ion binding		metabolic process	1.01881	0.910124
A4W1W3	F0F1-type ATP synthase, subunit a OS=Streptococcus suis (strain 98HAH33) GN=SSU98_1194 PE=4 SV=1 - [A4W1W3_STRS2]	transporter activity	membrane	metabolic process; transport	0.586873	0.00016323
Q4R0Z2	Uncharacterized protein OS=Streptococcus suis PE=4 SV=1 - [Q4R0Z2_STRSU]	DNA binding		metabolic process; regulation of biological process	0.766395	0.0595542
Q9EZW2	Elongation factor Tu (Fragment) OS=Streptococcus suis GN=tuf PE=4 SV=1 - [Q9EZW2_STRSU]	nucleotide binding; RNA binding; catalytic activity		metabolic process	1.73997	0.000546185
R4NKQ6	Chorismate mutase I OS=Streptococcus suis TL13 GN=TL13_1344 PE=4 SV=1 - [R4NKQ6_STRSU]				0.988164	0.929769
M1VDL7	ABC transporter permease protein OS=Streptococcus suis PE=4 SV=1 - [M1VDL7_STRSU]		membrane		1.94218	3.41381e-05
G7SBN9	LPXTG-motif cell wall anchor domain protein OS=Streptococcus suis D9 GN=SSUD9_0696 PE=4 SV=1 - [G7SBN9_STRSU]				1.07848	0.639397
G7S611	Putative uncharacterized protein OS=Streptococcus suis SS12 GN=SSU12_1969 PE=4 SV=1 - [G7S611_STRSU]	catalytic activity; metal ion binding			1.03185	0.847441
G7SD85	Putative uncharacterized protein OS=Streptococcus suis D12 GN=SSUD12_0149 PE=4 SV=1 - [G7SD85_STRSU]	protein binding			1.21268	0.229642
D5AII3	Putative uncharacterized protein OS=Streptococcus suis (strain GZ1) GN=SSGZ1_1191 PE=4 SV=1 - [D5AII3_STRGZ]				1.0066	0.97005
G7S3M8	Response regulator OS=Streptococcus suis SS12 GN=SSU12_0396 PE=4 SV=1 - [G7S3M8_STRSU]	signal transducer activity; DNA binding		cell communication; regulation of biological process; response to stimulus; metabolic process	0.830971	0.189377
G7SKQ9	Phosphoribosylformylglycinamidine synthase domain-containing protein OS=Streptococcus suis ST1 GN=SSUST1_0032 PE=4 SV=1 - [G7SKQ9_STRSU]	catalytic activity	membrane	metabolic process	0.876261	0.348546
J7KFD7	Uncharacterized protein OS=Streptococcus suis S735 GN=YYK_01845 PE=4 SV=1 - [J7KFD7_STRSU]				1.08077	0.629963
R4NL31	MF3-like protein OS=Streptococcus suis TL13 GN=TL13_1495 PE=4 SV=1 - [R4NL31_STRSU]				0.63094	0.00112042
G7S3T6	Hydroxymethylglutaryl-CoA reductase OS=Streptococcus suis SS12 GN=SSU12_1590 PE=3 SV=1 - [G7S3T6_STRSU]	catalytic activity		metabolic process	0.982804	0.899279
M1TL81	N utilization substance protein B homolog OS=Streptococcus suis SC070731 GN=nusB PE=3 SV=1 - [M1TL81_STRSU]	RNA binding		metabolic process; regulation of biological process	0.859274	0.282041
G7S1K8	Cell wall biosynthesis glycosyltransferase OS=Streptococcus suis SS12 GN=SSU12_1177 PE=4 SV=1 - [G7S1K8_STRSU]	catalytic activity			1.20347	0.248651
A4W070	Shikimate kinase OS=Streptococcus suis (strain 98HAH33) GN=aroK PE=3 SV=1 - [AROK_STRS2]	nucleotide binding; metal ion binding; catalytic activity	cytoplasm	metabolic process	0.943538	0.678366
D5AH97	Phosphoribosylformylglycinamidine (FGAM) synthase, synthetase domain protein OS=Streptococcus suis (strain GZ1) GN=SSGZ1_0755 PE=4 SV=1 - [D5AH97_STRGZ]				0.939429	0.655934
A4VUP6	Uncharacterized protein OS=Streptococcus suis (strain 05ZYH33) GN=SSU05_0869 PE=4 SV=1 - [A4VUP6_STRSY]				1.23201	0.193577
J7KJS7	Putative lipoprotein OS=Streptococcus suis S735 GN=YYK_06615 PE=4 SV=1 - [J7KJS7_STRSU]		membrane		1.00525	0.976707
G7SI53	Extracellular ligand-binding receptor OS=Streptococcus suis D12 GN=SSUD12_1504 PE=4 SV=1 - [G7SI53_STRSU]			transport	1.44776	0.0209815
M1UUT2	Phosphomannomutase OS=Streptococcus suis SC070731 GN=NJAUSS_0908 PE=4 SV=1 - [M1UUT2_STRSU]	catalytic activity		metabolic process	0.943582	0.678608
G5KZL3	Putative uncharacterized protein OS=Streptococcus suis R61 GN=SSUR61_0086 PE=4 SV=1 - [G5KZL3_STRSU]				1.16709	0.336108
B9WV55	50S ribosomal protein L36 OS=Streptococcus suis 89/1591 GN=rpmJ PE=3 SV=1 - [B9WV55_STRSU]	structural molecule activity	cytoplasm; ribosome	metabolic process	1.11017	0.516052
J7KR12	Keto-hydroxyglutarate-aldolase/keto-deoxy-phosphogluconate aldolase OS=Streptococcus suis S735 GN=YYK_05040 PE=4 SV=1 - [J7KR12_STRSU]	catalytic activity		metabolic process	0.783453	0.0838946
G7SFU4	Putative uncharacterized protein OS=Streptococcus suis D12 GN=SSUD12_1021 PE=4 SV=1 - [G7SFU4_STRSU]				1.54359	0.00675306
D5AFW7	Gram positive phosphomevalonate kinase OS=Streptococcus suis (strain GZ1) GN=SSGZ1_0267 PE=4 SV=1 - [D5AFW7_STRGZ]	nucleotide binding; catalytic activity	cytoplasm	metabolic process	0.976574	0.863825
G7S292	10 kDa chaperonin OS=Streptococcus suis SS12 GN=groS PE=3 SV=1 - [G7S292_STRSU]	nucleotide binding	cytoplasm	metabolic process	0.821554	0.163631
G7S4L5	Putative uncharacterized protein OS=Streptococcus suis SS12 GN=SSU12_0572 PE=4 SV=1 - [G7S4L5_STRSU]	DNA binding		metabolic process; regulation of biological process	1.00396	0.98313
G5KWW8	Putative uncharacterized protein OS=Streptococcus suis R61 GN=SSUR61_0009 PE=4 SV=1 - [G5KWW8_STRSU]				0.894986	0.430697
G5L0Y0	NifU-like protein OS=Streptococcus suis R61 GN=iscU PE=4 SV=1 - [G5L0Y0_STRSU]	metal ion binding		cell organization and biogenesis; metabolic process	1.09055	0.590532
G7S525	PilT family ATPase OS=Streptococcus suis SS12 GN=SSU12_0653 PE=4 SV=1 - [G7S525_STRSU]				1.29093	0.111392
E9NQ13	CPS16F OS=Streptococcus suis GN=cps16F PE=4 SV=1 - [E9NQ13_STRSU]	catalytic activity	membrane		0.860817	0.287752
G7S6X7	Phosphate-specific transport system accessory protein PhoU OS=Streptococcus suis SS12 GN=SSU12_1012 PE=3 SV=1 - [G7S6X7_STRSU]		cytoplasm	transport	0.909367	0.49945
A4W384	Exodeoxyribonuclease 7 small subunit OS=Streptococcus suis (strain 98HAH33) GN=xseB PE=3 SV=1 - [EX7S_STRS2]	catalytic activity	cytoplasm	metabolic process	0.881579	0.370972
M1UM64	Translation initiation factor 2 GTPase OS=Streptococcus suis SC070731 GN=NJAUSS_0263 PE=4 SV=1 - [M1UM64_STRSU]	RNA binding	extracellular	metabolic process	1.1949	0.26743
G7SHR3	6-phospho-beta-glucosidase 4 OS=Streptococcus suis D12 GN=SSUD12_1805 PE=3 SV=1 - [G7SHR3_STRSU]	catalytic activity		metabolic process	1.32953	0.0757282
D5AGM6	Putative uncharacterized protein OS=Streptococcus suis (strain GZ1) GN=SSGZ1_0526 PE=4 SV=1 - [D5AGM6_STRGZ]		membrane		0.913578	0.520414
G5L0U1	Putative uncharacterized protein OS=Streptococcus suis R61 GN=SSUR61_1721 PE=4 SV=1 - [G5L0U1_STRSU]				0.93542	0.634251
M1TIM7	Methylated DNA-protein cysteine methyltransferase OS=Streptococcus suis SC070731 GN=NJAUSS_0727 PE=4 SV=1 - [M1TIM7_STRSU]	catalytic activity		metabolic process; response to stimulus	2.16158	1.48937e-06
G7S2W9	Transcriptional regulator OS=Streptococcus suis SS12 GN=SSU12_1414 PE=4 SV=1 - [G7S2W9_STRSU]	DNA binding			1.04484	0.786768
R4NU92	Phosphate transport ATP-binding protein PstB OS=Streptococcus suis TL13 GN=pstB PE=3 SV=1 - [R4NU92_STRSU]	nucleotide binding			1.09794	0.56173
G7S7K4	Putative uncharacterized protein OS=Streptococcus suis D9 GN=SSUD9_1198 PE=4 SV=1 - [G7S7K4_STRSU]	catalytic activity		metabolic process	1.64572	0.00187683
Q7X203	D-tyrosyl-tRNA(Tyr) deacylase (Fragment) OS=Streptococcus suis PE=3 SV=1 - [Q7X203_STRSU]	catalytic activity	cytoplasm	metabolic process	1.07297	0.662454
G7S3G3	Transcriptional regulator OS=Streptococcus suis SS12 GN=SSU12_1535 PE=4 SV=1 - [G7S3G3_STRSU]				1.11798	0.488153
G7S6K3	MutT/NUDIX hydrolase family protein OS=Streptococcus suis SS12 GN=SSU12_2081 PE=3 SV=1 - [G7S6K3_STRSU]	catalytic activity			1.06469	0.697939
G5L0T5	ABC transporter related protein OS=Streptococcus suis R61 GN=SSUR61_1714 PE=3 SV=1 - [G5L0T5_STRSU]	nucleotide binding; transporter activity; catalytic activity	membrane	metabolic process; transport	1.11428	0.501223
G7S1A4	Phosphotransferase system, mannose/fructose/N-acetylgalactosamine-specific component IID OS=Streptococcus suis SS12 GN=SSU12_1120 PE=4 SV=1 - [G7S1A4_STRSU]	catalytic activity	membrane	transport	0.909291	0.499076
G7S229	Preprotein translocase subunit SecG OS=Streptococcus suis SS12 GN=secG PE=4 SV=1 - [G7S229_STRSU]	transporter activity	membrane	transport	1.25977	0.150072
G5KYI2	Carbamoyl-phosphate synthase small chain OS=Streptococcus suis R61 GN=carA PE=3 SV=1 - [G5KYI2_STRSU]	nucleotide binding; catalytic activity	membrane	metabolic process	1.41907	0.0290153
A4W3N0	3-oxoacyl-[acyl-carrier-protein] synthase 3 OS=Streptococcus suis (strain 98HAH33) GN=fabH PE=3 SV=1 - [FABH_STRS2]	catalytic activity	cytoplasm; membrane	metabolic process	1.05435	0.743588
B0M0G7	Phosphomethylpyrimidine kinase (Fragment) OS=Streptococcus suis PE=4 SV=1 - [B0M0G7_STRSU]	nucleotide binding; catalytic activity		metabolic process	1.63344	0.00219676
M1UWF4	Transcriptional regulator OS=Streptococcus suis SC070731 GN=NJAUSS_1844 PE=4 SV=1 - [M1UWF4_STRSU]	DNA binding			1.38939	0.0402474
G5KXE3	Glycerol-3-phosphate dehydrogenase [NAD(P)+] OS=Streptococcus suis R61 GN=gpsA PE=3 SV=1 - [G5KXE3_STRSU]	nucleotide binding; catalytic activity	cytoplasm; membrane	metabolic process	1.04909	0.767297
G7RXT3	Uncharacterized protein OS=Streptococcus suis A7 GN=SSUA7_0423 PE=4 SV=1 - [G7RXT3_STRSU]		membrane		0.98452	0.909047
D5AF05	Putative nrdI-like protein OS=Streptococcus suis (strain GZ1) GN=SSGZ1_1942 PE=4 SV=1 - [D5AF05_STRGZ]				0.999533	0.994176
C6GWG4	Uncharacterized protein OS=Streptococcus suis (strain BM407) GN=SSUBM407_0506 PE=4 SV=1 - [C6GWG4_STRS4]				1.03353	0.839502
G7S626	Serine/threonine protein phosphatase OS=Streptococcus suis SS12 GN=SSU12_1984 PE=4 SV=1 - [G7S626_STRSU]	catalytic activity			1.03272	0.843323
G5L1Q9	S4 domain protein YaaA OS=Streptococcus suis R61 GN=SSUR61_1530 PE=4 SV=1 - [G5L1Q9_STRSU]	RNA binding			1.18983	0.27907
A4VXX9	Uncharacterized protein conserved in bacteria OS=Streptococcus suis (strain 05ZYH33) GN=SSU05_2002 PE=4 SV=1 - [A4VXX9_STRSY]				1.03126	0.850246
G9CHY7	Truncated SatR OS=Streptococcus suis PE=4 SV=1 - [G9CHY7_STRSU]				0.922732	0.567149
G7S4A2	Response regulator OS=Streptococcus suis SS12 GN=SSU12_1677 PE=4 SV=1 - [G7S4A2_STRSU]	signal transducer activity; DNA binding		cell communication; regulation of biological process; response to stimulus; metabolic process	1.2153	0.224466
G5L050	DNA repair protein RecO OS=Streptococcus suis R61 GN=recO PE=3 SV=1 - [G5L050_STRSU]	enzyme regulator activity; metal ion binding		metabolic process; response to stimulus; regulation of biological process	0.792959	0.100323
G7S636	3-keto-L-gulonate-6-phosphate decarboxylase OS=Streptococcus suis SS12 GN=ulaD PE=4 SV=1 - [G7S636_STRSU]	catalytic activity		metabolic process	1.15133	0.380531
A4VZK9	UPF0397 protein SSU98_0390 OS=Streptococcus suis (strain 98HAH33) GN=SSU98_0390 PE=3 SV=1 - [Y390_STRS2]		membrane		0.943242	0.676744
A4W3C1	Putative phosphotyrosine protein phosphatase OS=Streptococcus suis (strain 98HAH33) GN=SSU98_1702 PE=4 SV=1 - [A4W3C1_STRS2]	catalytic activity		metabolic process	1.60975	0.0029684
G5L1X6	Maltose/maltodextrin ABC transport system permease protein OS=Streptococcus suis R61 GN=malC PE=3 SV=1 - [G5L1X6_STRSU]	transporter activity	membrane	transport	0.92552	0.581675
G5L0K3	Putative uncharacterized protein OS=Streptococcus suis R61 GN=SSUR61_1632 PE=4 SV=1 - [G5L0K3_STRSU]				0.893138	0.422201
A4VSN1	30S ribosomal protein S12 OS=Streptococcus suis (strain 05ZYH33) GN=rpsL PE=3 SV=1 - [RS12_STRSY]	RNA binding; structural molecule activity	cytoplasm; ribosome	metabolic process	1.13938	0.41696
G5KZE4	Putative uncharacterized protein OS=Streptococcus suis R61 GN=SSUR61_1011 PE=4 SV=1 - [G5KZE4_STRSU]				1.03236	0.845066
G7SN13	UDP-galactopyranose mutase OS=Streptococcus suis ST1 GN=SSUST1_1200 PE=4 SV=1 - [G7SN13_STRSU]	nucleotide binding; catalytic activity	membrane		1.13648	0.426156
A4VSR8	Transcriptional antiterminator OS=Streptococcus suis (strain 05ZYH33) GN=SSU05_0187 PE=4 SV=1 - [A4VSR8_STRSY]	transporter activity; catalytic activity		metabolic process; regulation of biological process; transport	1.03915	0.813125
G7S481	Cysteine aminopeptidase C OS=Streptococcus suis SS12 GN=SSU12_1656 PE=4 SV=1 - [G7S481_STRSU]	catalytic activity		metabolic process	0.922328	0.565055
A4W0T4	GMP reductase OS=Streptococcus suis (strain 98HAH33) GN=guaC PE=3 SV=2 - [GUAC_STRS2]	catalytic activity		metabolic process	1.06629	0.691001
R4NJ37	Lipid A export ATP-binding/permease protein MsbA OS=Streptococcus suis TL13 GN=msbA PE=4 SV=1 - [R4NJ37_STRSU]	nucleotide binding			1.19421	0.268998
G7SPA1	Putative scaffolding protein OS=Streptococcus suis ST1 GN=SSUST1_1324 PE=4 SV=1 - [G7SPA1_STRSU]	structural molecule activity			2.58425	3.057e-09
G7SBK2	Elongation factor Ts OS=Streptococcus suis D9 GN=tsf PE=3 SV=1 - [G7SBK2_STRSU]	RNA binding; protein binding	cytoplasm	metabolic process	2.26652	3.24158e-07
B9WYC7	ABC transporter related protein OS=Streptococcus suis 89/1591 GN=SsuiDRAFT_2024 PE=4 SV=1 - [B9WYC7_STRSU]	nucleotide binding; catalytic activity; transporter activity	membrane	metabolic process; transport	1.0779	0.641835
G7S8T6	CRISPR-associated endonuclease Cas1 OS=Streptococcus suis D9 GN=cas1 PE=3 SV=1 - [G7S8T6_STRSU]	catalytic activity; metal ion binding		cell organization and biogenesis; metabolic process; defense response; response to stimulus	1.03572	0.829204
A4W296	Uncharacterized protein OS=Streptococcus suis (strain 98HAH33) GN=SSU98_1327 PE=4 SV=1 - [A4W296_STRS2]	catalytic activity; metal ion binding		metabolic process	1.83737	0.000146273
A4VZR2	Galactose mutarotase and related enzyme OS=Streptococcus suis (strain 98HAH33) GN=SSU98_0443 PE=4 SV=1 - [A4VZR2_STRS2]	catalytic activity		metabolic process	1.0868	0.60548
A4VV99	DNA repair protein OS=Streptococcus suis (strain 05ZYH33) GN=SSU05_1072 PE=4 SV=1 - [A4VV99_STRSY]				1.54559	0.00658996
G7S5V9	Probable GTP-binding protein EngB OS=Streptococcus suis SS12 GN=engB PE=3 SV=1 - [G7S5V9_STRSU]	nucleotide binding; catalytic activity; transporter activity	membrane	cell division; cell organization and biogenesis; cell communication; regulation of biological process; response to stimulus; transport	0.990025	0.940343
Q1A7A9	Dpr protein (Fragment) OS=Streptococcus suis GN=dpr PE=3 SV=1 - [Q1A7A9_STRSU]	metal ion binding; catalytic activity		cellular homeostasis; response to stimulus; metabolic process	1.01767	0.915673
G7S5E3	Cobalt ABC transporter ATP-binding protein OS=Streptococcus suis SS12 GN=SSU12_0693 PE=4 SV=1 - [G7S5E3_STRSU]	nucleotide binding; catalytic activity		metabolic process	1.30193	0.0999745
G7RZ31	Anaerobic ribonucleoside-triphosphate reductase-activating protein OS=Streptococcus suis A7 GN=SSUA7_1927 PE=3 SV=1 - [G7RZ31_STRSU]	catalytic activity	cytoplasm	metabolic process	1.02427	0.883673
A4VZA9	Uncharacterized protein OS=Streptococcus suis (strain 98HAH33) GN=SSU98_0290 PE=3 SV=1 - [A4VZA9_STRS2]	nucleotide binding; catalytic activity; transporter activity	membrane	metabolic process; transport	1.0635	0.703111
G7S1Z1	Putative uncharacterized protein OS=Streptococcus suis SS12 GN=SSU12_1247 PE=4 SV=1 - [G7S1Z1_STRSU]			response to stimulus	0.917019	0.537802
G7S197	Putative uncharacterized protein OS=Streptococcus suis SS12 GN=SSU12_1111 PE=4 SV=1 - [G7S197_STRSU]				1.34008	0.0679393
G7S1G4	Aromatic amino acid aminotransferase OS=Streptococcus suis SS12 GN=SSU12_0023 PE=3 SV=1 - [G7S1G4_STRSU]	catalytic activity		metabolic process	1.11675	0.492469
G7S681	Putative uncharacterized protein OS=Streptococcus suis SS12 GN=SSU12_2039 PE=4 SV=1 - [G7S681_STRSU]				1.15604	0.366827
G5L354	NsuF OS=Streptococcus suis R61 GN=SSUR61_1118 PE=3 SV=1 - [G5L354_STRSU]	nucleotide binding; catalytic activity		metabolic process	0.907481	0.490175
G5KY37	Putative uncharacterized protein OS=Streptococcus suis R61 GN=SSUR61_0038 PE=4 SV=1 - [G5KY37_STRSU]				1.15177	0.379235
Q5H846	Putative uncharacterized protein OS=Streptococcus suis PE=3 SV=1 - [Q5H846_STRSU]	nucleotide binding; catalytic activity		metabolic process	1.09551	0.571119
G7SI34	D-alanine--poly(phosphoribitol) ligase subunit 1 OS=Streptococcus suis D12 GN=dltA PE=3 SV=1 - [G7SI34_STRSU]	nucleotide binding; catalytic activity	cytoplasm; membrane	metabolic process	1.30056	0.101343
G7S3V1	Putative uncharacterized protein OS=Streptococcus suis SS12 GN=SSU12_1605 PE=4 SV=1 - [G7S3V1_STRSU]	catalytic activity	membrane	metabolic process	1.21229	0.230417
G7SLJ0	Putative competence-damage inducible protein OS=Streptococcus suis ST1 GN=cinA PE=3 SV=1 - [G7SLJ0_STRSU]			metabolic process	0.564703	5.29642e-05
G5L307	Putative uncharacterized protein OS=Streptococcus suis R61 GN=SSUR61_1070 PE=4 SV=1 - [G5L307_STRSU]	catalytic activity	membrane		0.982783	0.89916
F4EFI5	Dihydroorotate dehydrogenase OS=Streptococcus suis GN=pyrD PE=3 SV=1 - [F4EFI5_STRSU]	catalytic activity; nucleotide binding	cytoplasm	metabolic process	1.01694	0.919209
F4EH67	LPXTG-motif cell wall anchor domain protein OS=Streptococcus suis GN=SSUST3_0198 PE=4 SV=1 - [F4EH67_STRSU]		extracellular; membrane		1.40738	0.0330422
G7SD13	ABC transporter related protein OS=Streptococcus suis D9 GN=SSUD9_1022 PE=3 SV=1 - [G7SD13_STRSU]	nucleotide binding; catalytic activity		metabolic process	1.04649	0.779188
A2VC24	Muramidase-released protein OS=Streptococcus suis GN=MRP PE=3 SV=1 - [A2VC24_STRSU]		extracellular; membrane		1.5793	0.00434877
G7S4L6	Putative uncharacterized protein OS=Streptococcus suis SS12 GN=SSU12_0573 PE=4 SV=1 - [G7S4L6_STRSU]				1.23335	0.191258
G7S4B1	Cell division protein FtsL OS=Streptococcus suis SS12 GN=ftsL PE=3 SV=1 - [G7S4B1_STRSU]		membrane	cell division; reproduction	1.14256	0.407016
G7S5S1	Glyoxalase/bleomycin resistance protein/dioxygenase superfamily protein OS=Streptococcus suis SS12 GN=SSU12_1960 PE=4 SV=1 - [G7S5S1_STRSU]	catalytic activity		metabolic process	1.0029	0.988404
B0M0G6	Amino acid permease (Fragment) OS=Streptococcus suis PE=4 SV=1 - [B0M0G6_STRSU]	transporter activity	membrane	transport	1.15388	0.373071
G7SPK9	Putative uncharacterized protein OS=Streptococcus suis ST1 GN=SSUST1_1930 PE=4 SV=1 - [G7SPK9_STRSU]	DNA binding	membrane		0.92437	0.575668
G7SJT4	Response regulator OS=Streptococcus suis ST1 GN=SSUST1_2012 PE=4 SV=1 - [G7SJT4_STRSU]	DNA binding			1.24002	0.180062
B9WXV2	ABC transporter related protein OS=Streptococcus suis 89/1591 GN=SsuiDRAFT_2265 PE=3 SV=1 - [B9WXV2_STRSU]	nucleotide binding; catalytic activity		metabolic process	0.8814	0.370204
R4NK04	4-hydroxy-tetrahydrodipicolinate synthase OS=Streptococcus suis TL13 GN=dapA PE=3 SV=1 - [R4NK04_STRSU]				1.04055	0.806601
M1VRH4	Putative glycosyltransferase OS=Streptococcus suis GN=cps26L PE=4 SV=1 - [M1VRH4_STRSU]	catalytic activity		metabolic process	1.27267	0.13285
M1VRG0	Uncharacterized protein OS=Streptococcus suis GN=cps22M PE=4 SV=1 - [M1VRG0_STRSU]				1.13673	0.425346
F4EDX7	Ribonuclease M5 OS=Streptococcus suis GN=rnmV PE=3 SV=1 - [F4EDX7_STRSU]	metal ion binding; RNA binding; catalytic activity	cytoplasm	metabolic process	1.0933	0.579725
G5KZC0	Major head protein OS=Streptococcus suis R61 GN=SSUR61_0986 PE=4 SV=1 - [G5KZC0_STRSU]				0.973003	0.843517
D5AIK1	Major cell-binding factor (CBF1) OS=Streptococcus suis (strain GZ1) GN=SSGZ1_1209 PE=4 SV=1 - [D5AIK1_STRGZ]	transporter activity		transport	0.998132	0.986266
A4W1B7	Ribosomal protein L10 OS=Streptococcus suis (strain 98HAH33) GN=SSU98_0998 PE=3 SV=1 - [A4W1B7_STRS2]		cytoplasm; ribosome		1.14429	0.401685
G5KWW4	Glycosyltransferase Gtf1 OS=Streptococcus suis R61 GN=gtf1 PE=3 SV=1 - [G5KWW4_STRSU]	catalytic activity	cytoplasm; membrane	metabolic process	0.905386	0.479964
A4W104	Tyrosine recombinase XerS OS=Streptococcus suis (strain 98HAH33) GN=xerS PE=3 SV=2 - [XERS_STRS2]	DNA binding; catalytic activity	cytoplasm; membrane	metabolic process; cell division	1.19	0.278667
B2LW80	Site-specific recombinase (Fragment) OS=Streptococcus suis PE=4 SV=1 - [B2LW80_STRSU]	DNA binding		metabolic process	1.46873	0.0164763
S6B433	RecN protein (Fragment) OS=Streptococcus suis GN=recN PE=4 SV=1 - [S6B433_STRSU]				3.00724	6.17163e-12
G5L2K3	Putative uncharacterized protein OS=Streptococcus suis R61 GN=SSUR61_2178 PE=4 SV=1 - [G5L2K3_STRSU]		membrane		1.02985	0.85699
G7SP92	Putative uncharacterized protein OS=Streptococcus suis ST1 GN=SSUST1_1315 PE=4 SV=1 - [G7SP92_STRSU]		membrane		1.65845	0.00159292
G7SFV1	Putative uncharacterized protein OS=Streptococcus suis D12 GN=SSUD12_1028 PE=4 SV=1 - [G7SFV1_STRSU]				1.46043	0.0181393
A4W361	Uridine kinase OS=Streptococcus suis (strain 98HAH33) GN=SSU98_1642 PE=3 SV=1 - [A4W361_STRS2]	nucleotide binding; catalytic activity		metabolic process	1.3105	0.0918026
G5L3A6	Putative uncharacterized protein OS=Streptococcus suis R61 GN=SSUR61_0101 PE=4 SV=1 - [G5L3A6_STRSU]				0.797436	0.108822
R4NZ92	TPR repeat-containing protein OS=Streptococcus suis TL13 GN=TL13_1991 PE=4 SV=1 - [R4NZ92_STRSU]				0.902235	0.464784
B9WXF6	Cell wall/surface repeat protein OS=Streptococcus suis 89/1591 GN=SsuiDRAFT_2637 PE=4 SV=1 - [B9WXF6_STRSU]				0.786292	0.088575
R4NVK5	DNA gyrase subunit B OS=Streptococcus suis TL13 GN=gyrB PE=3 SV=1 - [R4NVK5_STRSU]				1.2811	0.122541
G7S2N4	ABC transporter ATP-binding protein OS=Streptococcus suis SS12 GN=SSU12_0207 PE=3 SV=1 - [G7S2N4_STRSU]	nucleotide binding; catalytic activity		metabolic process	1.13943	0.416779
R4NW55	Plasmid replication protein Rep and AAA-class ATPase domain protein OS=Streptococcus suis TL13 GN=TL13_1699 PE=4 SV=1 - [R4NW55_STRSU]				2.77977	1.72316e-10
G7SIQ5	Putative uncharacterized protein OS=Streptococcus suis D12 GN=SSUD12_1958 PE=4 SV=1 - [G7SIQ5_STRSU]		membrane		2.4517	2.14922e-08
R4NST6	Hydrolase (HAD superfamily) OS=Streptococcus suis TL13 GN=TL13_0281 PE=4 SV=1 - [R4NST6_STRSU]	catalytic activity			0.95474	0.740425
F4EC05	Putative uncharacterized protein OS=Streptococcus suis GN=SSUST3_0263 PE=4 SV=1 - [F4EC05_STRSU]				1.57743	0.00445132
E9NQ29	CPS16V OS=Streptococcus suis GN=cps16U PE=4 SV=1 - [E9NQ29_STRSU]	catalytic activity		metabolic process	0.452748	2.09981e-08
G7S7E3	Helicase OS=Streptococcus suis D9 GN=SSUD9_1128 PE=4 SV=1 - [G7S7E3_STRSU]	nucleotide binding; DNA binding; catalytic activity		metabolic process; regulation of biological process	1.51692	0.00932506
B9WUV5	Transcriptional regulator, DeoR family OS=Streptococcus suis 89/1591 GN=SsuiDRAFT_3109 PE=4 SV=1 - [B9WUV5_STRSU]	DNA binding		metabolic process; regulation of biological process	2.65073	1.14897e-09
B0FYB8	Neprilysin (Fragment) OS=Streptococcus suis PE=4 SV=1 - [B0FYB8_STRSU]	catalytic activity		metabolic process	1.14605	0.396341
G7SD52	ABC superfamily ATP binding cassette transporter, membrane protein OS=Streptococcus suis D12 GN=SSUD12_0116 PE=4 SV=1 - [G7SD52_STRSU]	catalytic activity; motor activity; protein binding	cytoplasm; membrane; cytoskeleton	cell organization and biogenesis; transport	3.20158	3.67875e-13
G7SM99	Type I site-specific restriction-modification system, R (Restriction) subunit and related helicase OS=Streptococcus suis ST1 GN=SSUST1_1671 PE=4 SV=1 - [G7SM99_STRSU]	nucleotide binding; DNA binding; catalytic activity		metabolic process; defense response; response to stimulus	0.506277	1.48002e-06
G5L0Y1	ABC-type transport system involved in Fe-S cluster assembly, permease component OS=Streptococcus suis R61 GN=SSUR61_1762 PE=4 SV=1 - [G5L0Y1_STRSU]		membrane	cell organization and biogenesis; metabolic process	0.712334	0.0163509
C6GT52	Chloramphenicol acetyltransferase OS=Streptococcus suis (strain BM407) GN=cat PE=3 SV=1 - [C6GT52_STRS4]	catalytic activity		response to stimulus	1.10235	0.544996
G7S7A9	FAD-dependent pyridine nucleotide-disulfide oxidoreductase OS=Streptococcus suis D9 GN=SSUD9_1094 PE=4 SV=1 - [G7S7A9_STRSU]	catalytic activity; nucleotide binding	cytoplasm	metabolic process; cellular homeostasis; regulation of biological process	1.97036	2.29645e-05
